# Supplementary material
Source: Royal Society of Chemistry journal article supplement (doi:10.1039/d6gc01222a)

## Supplementary Information

### Sustainable access to *B,B',B''*-tri(aryl)borazines via a triflic anhydride-promoted/microwave approach

Ejdi Cela,<sup>+a</sup> Filippo Campana,<sup>+a</sup> Alireza Nazari Khodadadi,<sup>a</sup> Dario Marchionni,<sup>a</sup> Fan Huang,<sup>a</sup> and Luigi Vaccaro<sup>\*a</sup>

<sup>a</sup>Laboratory of Green S.O.C. – Dipartimento di Chimica, biologia e Biotecnologie, Università degli Studi di Perugia, Via Elce di Sotto 8, 06123 – Perugia, Italy; <http://www.dccb.unipg.it/greensoc>.

e-mail: [luigi.vaccaro@unipg.it](mailto:luigi.vaccaro@unipg.it)

### Table of Contents

|                                                                                                                     |    |
|---------------------------------------------------------------------------------------------------------------------|----|
| 1. General Remarks .....                                                                                            | 2  |
| 2. General procedure A: Reactions performed under conventional heating mode .....                                   | 3  |
| 3. General procedure B: Catalyst screening under microwave heating .....                                            | 4  |
| 4. General procedure C: Synthesis of differently substituted <i>B,B',B''</i> -tri(aryl) substituted borazines ..... | 5  |
| 5. E-factor, Space-Time Yield (STY), EcoScale and Safety/Hazard Score (SHS) calculations .....                      | 6  |
| 6. Synthesis and characterization of the starting materials .....                                                   | 8  |
| 7. Synthesis and characterization of <i>B,B',B''</i> -tri(aryl)substituted borazines .....                          | 12 |
| 8. References.....                                                                                                  | 28 |
| 9. Copies of NMR spectra .....                                                                                      | 28 |

### List of abbreviations

|                            |                    |
|----------------------------|--------------------|
| Diethyl ether              | Et <sub>2</sub> O  |
| Dichlorophenylborane       | PhBCl <sub>2</sub> |
| Hexamethyldisilazane       | HMDS               |
| Hexamethylcyclotrisilazane | HMCS               |
| Triflic anhydride          | Tf <sub>2</sub> O  |

## 1. General Remarks

Unless otherwise stated, chemicals were purchased from Merck, TCI, Fluorochem and used as obtained from commercial sources without further purification.

GLC analyses were performed by using Agilent 6850 Series GC System equipped with a capillary column BB-5MS (30 m, 0.32 mm), a FID detector and helium as gas carrier. GC-EIMS analyses were carried out by using Agilent 9890 GC System/5977C MSD equipped with an electron impact ionizer at 70eV. Nuclear magnetic resonance (NMR) characterizations were recorded on a Bruker DRX-ADVANCE 400 MHz ( $^1\text{H}$  at 400 MHz,  $^{13}\text{C}$  at 100.6 MHz,  $^{19}\text{F}$  at 376.4 MHz, and  $^{11}\text{B}$  NMR spectra at 128 MHz) using the solvent residual signal as an internal reference ( $\text{CDCl}_3$ :  $\delta\text{H} = 7.26$  ppm,  $\delta\text{C} = 77.16$  ppm and  $\text{DMSO}$ :  $\delta\text{H} = 2.50$  ppm,  $\delta\text{C} = 39.7$  ppm). Precisely,  $^{13}\text{C}$  NMR spectra were recorded using the "zgflqn" pulse sequence, a J-modulated spin-echo experiment. This sequence was specifically chosen to unambiguously assign carbon multiplicities and to ensure a flat baseline, which is critical when characterizing boron-containing compounds, where signals are often broadened due to quadrupolar relaxation of  $^{11}\text{B}$  nuclei. In the recorded spectra, the phase was adjusted according to the J-modulation, so that quaternary and secondary carbons (as well as the selected solvent) appear negative, while primary and tertiary carbons appear positive. Boron chemical shifts are reported in ppm, referenced to the external standard boron signal of  $\text{BF}_3 \cdot \text{Et}_2\text{O}$  ( $\delta\text{B} = 0$  ppm). Chemical shifts are reported in ppm ( $\delta$ ), coupling constant (J) in hertz and multiplicity are reported as follows: s = singlet, bs = broad singlet, d = doublet, dd = double doublet, td = double triplet, t = triplet, t = triplet triplet, m = multiplet.

MW assisted reactions were performed in CEM Discover SP microwave oven equipped with 10 mL tubes in sealed reaction vessel mode and temperature was measured with the external surface IR sensor. The method used was Dynamic, with parameters wet as follows: T: 150 °C, t: 1 h,  $\mu\lambda=150$  W, Pressure: 300 psi, Mixing: high, PowerMax: On, Stage 1 of 1.

Boronic esters (**1-1r**) were synthesized according to literature available procedures.<sup>1</sup> In the case of new compounds, they were fully characterized (**1e**, **1i**, **1m**, **1p**).

Compounds **4**,<sup>2</sup> **8**<sup>3</sup> and **9**<sup>4</sup> were synthesised according to previously reported procedures.

## 2. General procedure A: Reactions performed under conventional heating mode

### 2.1 Screening of boron source

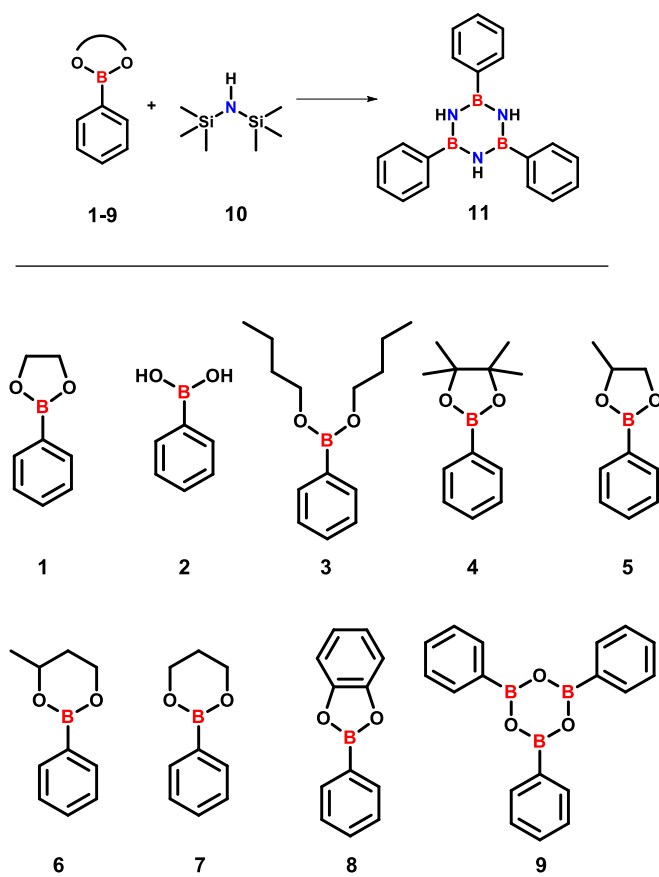

**Figure SI-1.** Screening of boron source.

An 8 mL screw-capped vial, pre-dried in oven, was evacuated and flushed with argon. To the vial, 1 mmol of the boronate ester was added (1-9) followed by another cycle of evacuation and argon filling. Next, 3 mL of HMDS was introduced, and the reaction mixture was heated to 150 °C for 72 hours. After completion, the reaction was allowed to cool to room temperature. The mixture was then treated with 3 mL of heptane, and the resulting precipitate was collected by filtration.

### 3. General procedure B: Catalyst screening under microwave heating

Table SI-1 Catalysts screening

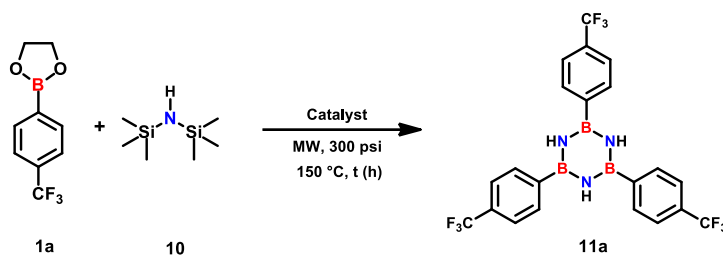

| Entry | Catalyst/activator (30 mol%)     | Time (h) | Yield (%) |
|-------|----------------------------------|----------|-----------|
| 1     | -                                | 5        | 31        |
| 2     | H <sub>2</sub> SO <sub>4</sub>   | 3        | 38        |
| 3     | BBr <sub>3</sub>                 | 3        | 0         |
| 4     | BCl <sub>3</sub> <sup>a</sup>    | 3        | Traces    |
| 5     | BF <sub>3</sub> OEt <sub>2</sub> | 3        | <10       |
| 6     | AlCl <sub>3</sub>                | 3        | 0         |
| 7     | FeCl <sub>3</sub>                | 3        | 0         |
| 8     | TfOH                             | 3        | 49        |
| 9     | TMS-OTf                          | 3        | <20       |
| 10    | TBDMS-OTf                        | 3        | 51        |
| 11    | Tf <sub>2</sub> O                | 3        | 75        |

Reaction condition: **1a** (1 mmol), **10** (3 mL); <sup>a</sup>300  $\mu$ L in hexane 1M solution

**General procedure for entries 1-5, 8-11:** A microwave vessel, pre-dried in oven, was evacuated and flushed with argon. To the vessel, 1 mmol of 2-(4-(trifluoromethyl)phenyl)-1,3,2-dioxaborolane (**1a**, 216 mg) was added, followed by another cycle of evacuation and argon filling. Next, 3 mL of HMDS (**10**) were introduced. The appropriate quantity of catalyst was then added dropwise. The vessel was placed in the microwave synthesizer and subjected to 150 °C for the reported time at 150 W microwave power, with a pressure of 300 psi (20.7 bar), high mixing, and PowerMax enabled. After cooling to room temperature, the mixture was transferred to a round-bottom flask, and HMDS was removed under reduced pressure. The product **11a** was isolated by precipitation with 3 mL of heptane.

**General procedure for entries 6 and 7:** A microwave vessel, pre-dried in oven, was evacuated and flushed with argon. To the vessel, 1 mmol of 2-(4-(trifluoromethyl)phenyl)-1,3,2-dioxaborolane (**1a**, 216 mg) and the appropriate quantity of catalyst were added, followed by another cycle of evacuation and argon filling. Next, 3 mL of HMDS (**10**) were introduced. The vessel was placed in the microwave synthesizer and subjected to 150 °C for the reported time at 150 W microwave power, with a pressure of 300 psi (20.7 bar), high mixing, and PowerMax enabled. After cooling to room temperature, the mixture was transferred to a round-bottom flask, and HMDS was removed under reduced pressure. The resulting solid was treated with Et<sub>2</sub>O and stirred at room temperature for 30 minutes. The catalyst

was then removed by filtration. Et<sub>2</sub>O was evaporated under reduced pressure, and the product **11a** was isolated by precipitation with 3 mL of heptane.

#### 4. General procedure C: Synthesis of differently substituted *B,B',B''*-tri(aryl) substituted borazines

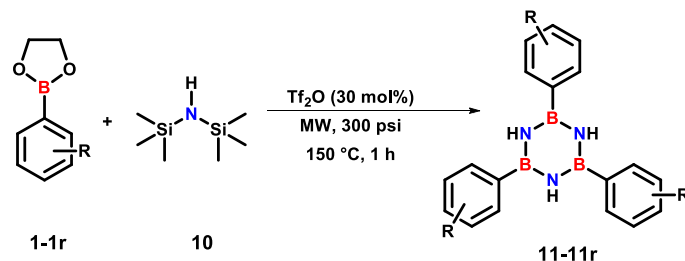

**Scheme SI-1.** General procedure for the synthesis of *B,B',B''*-tri(aryl) substituted borazines.

A microwave vessel, pre-dried in oven, was evacuated and flushed with argon. To the vessel, 1 mmol of 2-aryl-1,3,2-dioxaborolane (**1-1r**) was added, followed by another cycle of evacuation and argon filling. Next, 1 mL of HMDS (**10**) was introduced and 30 mol% of  $\text{Tf}_2\text{O}$  (50  $\mu\text{L}$ ) were added dropwise. The vessel was placed in the microwave synthesizer and subjected to 150 °C for 1 hour at 150 W microwave power, with a pressure of 300 psi (20.7 bar), high mixing, and PowerMax enabled. After cooling to room temperature, 3 mL of heptane were added, and the mixture was stirred for 30 minutes. The product (**11-11r**) was then isolated by filtration.

## 5. E-factor, Space-Time Yield (STY), EcoScale and Safety/Hazard Score (SHS) calculations

**Table SI-2.** E-Factor calculations and comparison among this work and the reference procedures.

| References                    | E-Factor calculation                                                                                                                                                                                                                                                                                                                        |
|-------------------------------|---------------------------------------------------------------------------------------------------------------------------------------------------------------------------------------------------------------------------------------------------------------------------------------------------------------------------------------------|
| Nöth et al., 1974             | $[16 \text{ g (HMCS)} + 23 \text{ g (PhBCl}_2) + 574.2 \text{ g (hexane)}^a + 876.5 \text{ g (benzene)}] - [5.4 \text{ g (product 11)} + 5.3 \text{ g (monosilaborazine)}] / 5.4 \text{ g (product 11)} = \mathbf{273.89}$                                                                                                                  |
| Svatikov et al., 1991         | $[11.707 \text{ mg (DBPB)} + 10.9755 \text{ mg (HMCS)} + 0.01471 \text{ mg (H}_2\text{SO}_4) + 198 \text{ mg (hexane)}^a] - [1.85 \text{ mg (product 11)} + 3.2926 \text{ mg (HMCS recovered)} + 3.7462 \text{ mg (DBPB recovered)}] / 1.85 \text{ mg (product 11)} = \mathbf{114.49}$                                                      |
| Gruzinova et al., 1987        | $[2.19 \text{ g (HMCS)} + 3.12 \text{ g (9)} + 0.0056 \text{ g (KOH)} + 52.722 \text{ g (benzene for extraction)}^a + 60 \text{ g (water for extraction)}^a + 20.385 \text{ (heptane)}^a] - [1.2 \text{ g (product 11)} + 0.04342 \text{ g (CH}_4) + 0.23433 \text{ g (benzene recovered)}] / 1.2 \text{ g (product 11)} = \mathbf{114.12}$ |
| Nöth et al., 2005             | $[72.6 \text{ g (10)} + 75 \text{ g (PhBCl}_2) + 332.5 \text{ g (DCM)} + 1155 \text{ g (Et}_2\text{O)}^a] - [45.4 \text{ g (product 11)}] / 45.4 \text{ g (product 11)} = \mathbf{35.01}$                                                                                                                                                   |
| <b>This work</b> (product 10) | $[770 \text{ mg (10)} + 147.97 \text{ mg (1)} + 84 \text{ mg (Tf}_2\text{O)} + 2038.5 \text{ mg (heptane)}] - [101 \text{ mg (product 11)}] / 101 \text{ mg (product 11)} = \mathbf{29.1}$                                                                                                                                                  |

<sup>a</sup> Solvent quantity used for purification and isolation steps for the literature references were estimated based on our expertise, as the authors did not provide specific information.

**Table SI-3.** Space-Time Yield calculations

| References                    | Space-Time Yield calculation                                                                                                                                                                                                                  |
|-------------------------------|-----------------------------------------------------------------------------------------------------------------------------------------------------------------------------------------------------------------------------------------------|
| Nöth et al., 1974             | $5.4 \text{ g (product 11)} / [(1 \text{ L (benzene)} + 0.017 \text{ L (HMCS)} + 0.019 \text{ L (PhBCl}_2))] \times 36 \text{ h} = \mathbf{0.15 \text{ g L}^{-1} \text{ h}^{-1}}$                                                             |
| Svatikov et al., 1991         | $[0.00185 \text{ g (product 11)}] / [(1.27 \times 10^{-5} \text{ L (PhB(OBu)}_2) + 1.19 \times 10^{-5} \text{ L (HMCS)} + 8.03 \times 10^{-9} \text{ (H}_2\text{SO}_4))] \times 11 \text{ h} = \mathbf{6.83 \text{ g L}^{-1} \text{ h}^{-1}}$ |
| Gruzinova et al., 1987        | $1.2 \text{ g (product 11)} / [(0.0024 \text{ L (HMCS)} + 0.0028 \text{ L (PBA)} + 0.000023 \text{ L (KOH)}) \times 4 \text{ h}] = \mathbf{57.44 \text{ g L}^{-1} \text{ h}^{-1}}$                                                            |
| Nöth et al., 2005             | $45.4 \text{ g (product 11)} / [(0.250 \text{ L (benzene)} + 0.094 \text{ L (10)} + 0.061 \text{ L (PhBCl}_2))] \times 240 \text{ h} = \mathbf{0.47 \text{ g L}^{-1} \text{ h}^{-1}}$                                                         |
| <b>This work</b> (product 10) | $0.101 \text{ mg (product 11)} / [(0.001 \text{ L (10)} + 0.00005 \text{ (Tf}_2\text{O)} + 1.36 \times 10^{-4} \text{ L (1)}) \times 1 \text{ h}] = \mathbf{85.16 \text{ g L}^{-1} \text{ h}^{-1}}$                                           |

**Table SI-4.** EcoScale calculations.<sup>a</sup>

| Reference               | Yield (PPts) | Price (PPts) | Safety (PPts) | Technical setup (PPts) | Temperature/time (PPts) | Workup and purification (PPts) | Ecoscale value <sup>a</sup> |
|-------------------------|--------------|--------------|---------------|------------------------|-------------------------|--------------------------------|-----------------------------|
| Nöth et al., 1974       | 32           | 18           | 20            | 0                      | 2                       | 3                              | <b>25</b>                   |
| Svatikov et al., 1991   | 32           | 13           | 15            | 0                      | 3                       | 11                             | <b>26</b>                   |
| Gruzinova et al., 1987  | 30           | 18           | 25            | 3                      | 3                       | 4                              | <b>17</b>                   |
| Nöth et al., 2005       | 1            | 11           | 20            | 1                      | 8                       | 4                              | <b>55</b>                   |
| <b><i>This work</i></b> | 1            | 16           | 15            | 0                      | 2                       | 0                              | <b>66</b>                   |

<sup>a</sup>PPts= Penalty points;  $100 - \sum \text{PPts}$

**Table SI-5.** Safety/Hazard Score (SHS) calculations.

| Solvent       | CGP   | CLP   | FP    | OBP   | XVP   | OELP    | SDP     | RPP   | TOTAL        |
|---------------|-------|-------|-------|-------|-------|---------|---------|-------|--------------|
| Benzene       | 0.001 | 0.272 | 0.870 | 0.768 | 1.214 | 994.146 | 4.710   | 3.603 | 1005.586     |
| Diethyl ether | 1.000 | 1.858 | 1.000 | 0.648 | 0.895 | 0.252   | 479.001 | 0.878 | 485.531      |
| Hexane        | 0.003 | 1.125 | 0.908 | 0.882 | 1.360 | 1.952   | 0.004   | 2.615 | 8.849        |
| Heptane       | 0.005 | 1.125 | 0.848 | 0.878 | 1.619 | 1.167   | 0.478   | 1.282 | <b>7.402</b> |

## 6. Synthesis and characterization of the starting materials

| Chem. Name                                                                                                                                                                                                                                                                                                                                                                                                                                                                                                                                                                                                                         |         | 2-(4-iodophenyl)-1,3,2-dioxaborolane ( <b>1e</b> ) |       |            |        |
|------------------------------------------------------------------------------------------------------------------------------------------------------------------------------------------------------------------------------------------------------------------------------------------------------------------------------------------------------------------------------------------------------------------------------------------------------------------------------------------------------------------------------------------------------------------------------------------------------------------------------------|---------|----------------------------------------------------|-------|------------|--------|
| 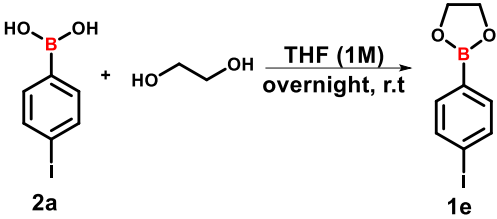 <p style="text-align: center;">M. W.: 273.863</p>                                                                                                                                                                                                                                                                                                                                                                                                                                                                                               |         |                                                    |       |            |        |
| <p><b>METHOD:</b> In an oven dried round bottom flask were added 5 mmol of 4-iodophenylboronic acid (<b>2a</b>, 1.239 g) and 4 mL of dry THF. After solubilization, ethylene glycol (17.88 mmol, 1 mL) was added and the reaction mixture was allowed to stir overnight at room temperature. Afterwards, the mixture was concentrated under reduced pressure and 5 mL of diethyl ether were added. The resulting solution was transferred to 1 g of dry CaCl<sub>2</sub> powder and, after filtration and evaporation under vacuum, the product (<b>1e</b>) was collected as a pale-brown solid (1.092 g, 80% isolated yield).</p> |         |                                                    |       |            |        |
| Mol Formula                                                                                                                                                                                                                                                                                                                                                                                                                                                                                                                                                                                                                        |         | C <sub>8</sub> H <sub>8</sub> BIO <sub>2</sub>     |       | m.p        | 100 °C |
| <sup>1</sup> H NMR<br>400<br>MHz<br>CDCl <sub>3</sub>                                                                                                                                                                                                                                                                                                                                                                                                                                                                                                                                                                              | δ value | No. H                                              | Mult. | j value/Hz |        |
|                                                                                                                                                                                                                                                                                                                                                                                                                                                                                                                                                                                                                                    | 4.38    | 4                                                  | s     | -          |        |
|                                                                                                                                                                                                                                                                                                                                                                                                                                                                                                                                                                                                                                    | 7.52    | 2                                                  | d     | 8.13       |        |
|                                                                                                                                                                                                                                                                                                                                                                                                                                                                                                                                                                                                                                    | 7.74    | 2                                                  | d     | 8.09       |        |
| <p><sup>13</sup>C NMR (100.6 MHz, CDCl<sub>3</sub>) δ: 137.11, 136.33, 99.15, 66.14. The signal for the carbon atom attached to boron atom was not detected because of the quadrupolar relaxation of the boron atom.</p>                                                                                                                                                                                                                                                                                                                                                                                                           |         |                                                    |       |            |        |
| <p><sup>11</sup>B NMR (128 MHz, CDCl<sub>3</sub>) δ: 31.66</p>                                                                                                                                                                                                                                                                                                                                                                                                                                                                                                                                                                     |         |                                                    |       |            |        |
| <p><b>GC-EIMS (m/z, %):</b> 275 (M+ +1, 19), 274 (M+, 100), 273 (M+ -1, 41), 217 (13), 1147.1 (42), 146.1 (11), 121 (19), 117.1 (14), 103.1 (49), 77.1 (31), 76.1 (11)</p>                                                                                                                                                                                                                                                                                                                                                                                                                                                         |         |                                                    |       |            |        |

| Chem. Name                                                                                                                                                                                                                                                                                                                                                                                                                                                                                                                                                                                                                     | 2-(4-tert-butylphenyl)-1,3,2-dioxaborolane (1i) |              |              |                   |
|--------------------------------------------------------------------------------------------------------------------------------------------------------------------------------------------------------------------------------------------------------------------------------------------------------------------------------------------------------------------------------------------------------------------------------------------------------------------------------------------------------------------------------------------------------------------------------------------------------------------------------|-------------------------------------------------|--------------|--------------|-------------------|
| 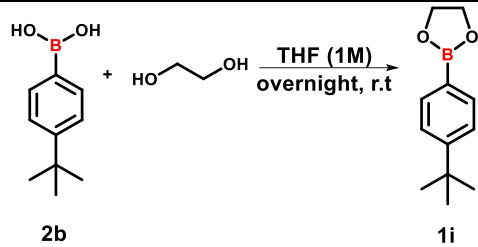 <p style="text-align: center;">M. W.: 204.073</p>                                                                                                                                                                                                                                                                                                                                                                                                                                                                                           |                                                 |              |              |                   |
| <b>METHOD:</b> In an oven dried round bottom flask were added 5 mmol of 4-tert-butylphenylboronic acid ( <b>2b</b> , 890 mg) and 4 mL of dry THF. After solubilization ethylene glycol (17.88 mmol, 1 mL) was added and the reaction mixture was allowed to stir overnight at room temperature. Afterwards, the mixture was concentrated under reduced pressure and 5 mL of diethyl ether were added. The resulting solution was transferred to 1 g of dry CaCl <sub>2</sub> powder and, after filtration and evaporation under vacuum, the product ( <b>1i</b> ) was collected as a white solid (835 mg, 82% isolated yield). |                                                 |              |              |                   |
| <b>Mol Formula</b>                                                                                                                                                                                                                                                                                                                                                                                                                                                                                                                                                                                                             | C <sub>12</sub> H <sub>17</sub> BO <sub>2</sub> |              | <b>m.p</b>   | 80 °C             |
| <b><sup>1</sup>H NMR</b><br>400<br>MHz<br>CDCl <sub>3</sub>                                                                                                                                                                                                                                                                                                                                                                                                                                                                                                                                                                    | <b>δ value</b>                                  | <b>No. H</b> | <b>Mult.</b> | <b>j value/Hz</b> |
|                                                                                                                                                                                                                                                                                                                                                                                                                                                                                                                                                                                                                                | 1.33                                            | 9            | s            | -                 |
|                                                                                                                                                                                                                                                                                                                                                                                                                                                                                                                                                                                                                                | 4.37                                            | 4            | s            | -                 |
|                                                                                                                                                                                                                                                                                                                                                                                                                                                                                                                                                                                                                                | 7.42                                            | 2            | d            | 8.2               |
|                                                                                                                                                                                                                                                                                                                                                                                                                                                                                                                                                                                                                                | 7.76                                            | 2            | d            | 8.2               |
| <b><sup>13</sup>C NMR</b> (100.6 MHz, CDCl <sub>3</sub> ) δ: 154.72, 134.76, 124.85, 65.98, 34.93, 31.19. The signal for the carbon atom attached to boron atom was not detected because of the quadrupolar relaxation of the boron atom.                                                                                                                                                                                                                                                                                                                                                                                      |                                                 |              |              |                   |
| <b><sup>11</sup>B NMR</b> (128 MHz, CDCl <sub>3</sub> ) δ: 31.64                                                                                                                                                                                                                                                                                                                                                                                                                                                                                                                                                               |                                                 |              |              |                   |
| <b>GC-EIMS (m/z, %):</b> 204.1 (M+, 20), 190.1 (17), 189.1 (100), 188.1 (22), 184 (11), 161.1 (25), 117.1 (20), 105.1 (13), 91.1 (26)                                                                                                                                                                                                                                                                                                                                                                                                                                                                                          |                                                 |              |              |                   |

| Chem. Name                                                                                                                                                                                                                                                                                                                                                                                                                                                                                                                                                                                                        | 2-(3-bromophenyl)-1,3,2-dioxaborolane (1m)      |              |              |                   |  |
|-------------------------------------------------------------------------------------------------------------------------------------------------------------------------------------------------------------------------------------------------------------------------------------------------------------------------------------------------------------------------------------------------------------------------------------------------------------------------------------------------------------------------------------------------------------------------------------------------------------------|-------------------------------------------------|--------------|--------------|-------------------|--|
| <p style="text-align: center;"><b>M. W.: 226.863</b></p>                                                                                                                                                                                                                                                                                                                                                                                                                                                                                                                                                          |                                                 |              |              |                   |  |
| <b>METHOD:</b> In an oven dried round bottom flask were added 5 mmol of 3-bromophenylboronic acid ( <b>2c</b> , 1.004 g) and 4 mL of dry THF. After solubilization ethylene glycol (17.88 mmol, 1 mL) was added and the reaction mixture was allowed to stir overnight at room temperature. Afterwards, the mixture was concentrated under reduced pressure and 5 mL of diethyl ether were added. The resulting solution was transferred to 1 g of dry CaCl <sub>2</sub> powder and, after filtration and evaporation under vacuum, the product ( <b>1m</b> ) was collected as a colorless liquid (1.010 g, 89%). |                                                 |              |              |                   |  |
| <b>Mol Formula</b>                                                                                                                                                                                                                                                                                                                                                                                                                                                                                                                                                                                                | C <sub>8</sub> H <sub>8</sub> BBrO <sub>2</sub> |              |              |                   |  |
| <b><sup>1</sup>H NMR</b><br>400<br>MHz<br>CDCl <sub>3</sub>                                                                                                                                                                                                                                                                                                                                                                                                                                                                                                                                                       | <b>δ value</b>                                  | <b>No. H</b> | <b>Mult.</b> | <b>j value/Hz</b> |  |
|                                                                                                                                                                                                                                                                                                                                                                                                                                                                                                                                                                                                                   | 4.33                                            | 4            | <i>s</i>     | -                 |  |
|                                                                                                                                                                                                                                                                                                                                                                                                                                                                                                                                                                                                                   | 7.19-7.23                                       | 1            | <i>m</i>     | -                 |  |
|                                                                                                                                                                                                                                                                                                                                                                                                                                                                                                                                                                                                                   | 7.54-7.56                                       | 1            | <i>m</i>     | -                 |  |
|                                                                                                                                                                                                                                                                                                                                                                                                                                                                                                                                                                                                                   | 7.67                                            | 1            | <i>d</i>     | 7.3               |  |
|                                                                                                                                                                                                                                                                                                                                                                                                                                                                                                                                                                                                                   | 7.89                                            | 1            | <i>s</i>     | -                 |  |
| <b><sup>13</sup>C NMR</b> (100.6 MHz, CDCl <sub>3</sub> ) δ: 137.62, 134.43, 133.19, 129.65, 122.50, 66.18. The signal for the carbon atom attached to boron atom was not detected because of the quadrupolar relaxation of the boron atom.                                                                                                                                                                                                                                                                                                                                                                       |                                                 |              |              |                   |  |
| <b><sup>11</sup>B NMR</b> (128 MHz, CDCl <sub>3</sub> ) δ: 31.14                                                                                                                                                                                                                                                                                                                                                                                                                                                                                                                                                  |                                                 |              |              |                   |  |
| <b>GC-EIMS (m/z, %):</b> 228 (M+ +2, 100), 227 (M+ +1, 42), 226 (M+, 100), 225 (M+ -1, 30), 198 (28), 197 (12), 196 (29), 171 (70), 169 (72), 117.1 (54), 116.1 (13), 103 (34), 91 (14), 90 (16), 89.1 (10), 77 (31), 76 (16), 75 (14), 73 (20), 65 (11), 51 (10)                                                                                                                                                                                                                                                                                                                                                 |                                                 |              |              |                   |  |

| Chem. Name                                                                                                                                                                                                                                                                                                                                                                                                                                                                                                                                                                                                                              | 2-(2,4-difluorophenyl)-1,3,2-dioxaborolane (1p)              |              |              |                   |
|-----------------------------------------------------------------------------------------------------------------------------------------------------------------------------------------------------------------------------------------------------------------------------------------------------------------------------------------------------------------------------------------------------------------------------------------------------------------------------------------------------------------------------------------------------------------------------------------------------------------------------------------|--------------------------------------------------------------|--------------|--------------|-------------------|
| <p style="text-align: center;"> <chem>Oc1cc(F)c(B(O)O)cc1</chem> + <chem>OCCO</chem> <math>\xrightarrow[\text{overnight, r.t.}]{\text{THF (1M)}}</math> <chem>Oc1cc(F)c(B1OCCO1)cc1</chem> </p> <p style="text-align: center;"> <b>2d</b> <span style="margin-left: 150px;"></span> <b>1p</b> </p> <p style="text-align: center;"><b>M. W.: 183.948</b></p>                                                                                                                                                                                                                                                                             |                                                              |              |              |                   |
| <b>METHOD:</b> In an oven dried round bottom flask were added 5.83 mmol of 2,4-difluorophenylboronic acid ( <b>2d</b> , 920 mg) and 4 mL of dry THF. After solubilization ethylene glycol (17.88 mmol, 1 mL) was added and the reaction mixture was allowed to stir overnight at room temperature. Afterwards, the mixture was concentrated under reduced pressure and 5 mL of diethyl ether were added. The resulting solution was transferred to 1 g of dry CaCl <sub>2</sub> powder and, after filtration and evaporation under vacuum, the product ( <b>1p</b> ) was collected as an off-white solid (0.776 g, isolated yield 84%). |                                                              |              |              |                   |
| <b>Mol Formula</b>                                                                                                                                                                                                                                                                                                                                                                                                                                                                                                                                                                                                                      | C <sub>8</sub> H <sub>7</sub> BF <sub>2</sub> O <sub>2</sub> |              | <b>m.p</b>   | 90 °C             |
| <b><sup>1</sup>H NMR</b><br>400<br>MHz<br>CDCl <sub>3</sub>                                                                                                                                                                                                                                                                                                                                                                                                                                                                                                                                                                             | <b>δ value</b>                                               | <b>No. H</b> | <b>Mult.</b> | <b>j value/Hz</b> |
|                                                                                                                                                                                                                                                                                                                                                                                                                                                                                                                                                                                                                                         | 4.40                                                         | 4            | <i>s</i>     | -                 |
|                                                                                                                                                                                                                                                                                                                                                                                                                                                                                                                                                                                                                                         | 6.77-6.82                                                    | 1            | <i>m</i>     | -                 |
|                                                                                                                                                                                                                                                                                                                                                                                                                                                                                                                                                                                                                                         | 6.87-6.92                                                    | 1            | <i>m</i>     | -                 |
|                                                                                                                                                                                                                                                                                                                                                                                                                                                                                                                                                                                                                                         | 7.72-7.78                                                    | 1            | <i>m</i>     | -                 |
| <b><sup>13</sup>C NMR</b> (100.6 MHz, CDCl <sub>3</sub> ) δ: 168.16 (dd, <sup>1</sup> J <sub>C-F</sub> =225.6Hz, <sup>4</sup> J <sub>C-F</sub> =12.3Hz), 165.64 (dd, <sup>1</sup> J <sub>C-F</sub> =225.3Hz, <sup>4</sup> J <sub>C-F</sub> =12.2Hz), 138.32 (t, <sup>2</sup> J <sub>C-F</sub> =9.9Hz), 111.42 (dd, <sup>3</sup> J <sub>C-F</sub> =20.4Hz, <sup>5</sup> J <sub>C-F</sub> =3.5Hz), 103.87 (dd, <sup>2</sup> J <sub>C-F</sub> =27.9Hz, <sup>2</sup> J <sub>C-F</sub> =24.4Hz), 66.05. The signal for the carbon atom attached to boron atom was not detected because of the quadrupolar relaxation of the boron atom.      |                                                              |              |              |                   |
| <b><sup>11</sup>B NMR</b> (128 MHz, CDCl <sub>3</sub> ) δ: 30.67                                                                                                                                                                                                                                                                                                                                                                                                                                                                                                                                                                        |                                                              |              |              |                   |
| <b><sup>19</sup>F NMR</b> (376.4 MHz, CDCl <sub>3</sub> ) δ: -99.04, -104.37                                                                                                                                                                                                                                                                                                                                                                                                                                                                                                                                                            |                                                              |              |              |                   |
| <b>GC-EIMS (m/z, %):</b> 185.1 (M+ +1, 12), 184 (M+, 100), 183 (M + -1, 46), 166 (38), 165.1 (16), 154 (28), 153 (69), 152 (10), 147.1 (37), 136 (20), 135 (18), 127 (29), 125 (22), 124 (14), 109 (46), 108 (42), 107 (29), 94 (13), 75 (15), 74 (13), 73 (859), 71.1 (10), 57.1 (12), 51 (12)                                                                                                                                                                                                                                                                                                                                         |                                                              |              |              |                   |

## 7. Synthesis and characterization of *B,B',B''*-tri(aryl)borazines

| Chem. Name                                                                                                                                                                                                                                                                                                                                                                                                                                                                                                                                                                                                                                                                                                                                                         | <i>B,B',B''</i> -tri(phenyl)borazine ( <b>11</b> ) |                                                               |              |                   |        |
|--------------------------------------------------------------------------------------------------------------------------------------------------------------------------------------------------------------------------------------------------------------------------------------------------------------------------------------------------------------------------------------------------------------------------------------------------------------------------------------------------------------------------------------------------------------------------------------------------------------------------------------------------------------------------------------------------------------------------------------------------------------------|----------------------------------------------------|---------------------------------------------------------------|--------------|-------------------|--------|
| <p style="text-align: center;"><b>1</b> + <b>10</b> <math>\xrightarrow[\text{150 } ^\circ\text{C, 1 h}]{\text{Tf}_2\text{O (30\%) MW, 300 psi}}</math> <b>11</b></p> <p style="text-align: center;">M. W.: 308.789</p>                                                                                                                                                                                                                                                                                                                                                                                                                                                                                                                                             |                                                    |                                                               |              |                   |        |
| <p><b>METHOD:</b> A microwave vessel, pre-dried in oven, was evacuated and flushed with argon. To the vessel, 1 mmol of 2-phenyl-1,3,2-dioxaborolane (<b>1</b>, 148 mg) was added, followed by another cycle of evacuation and argon filling. Next, 1 mL of HMDS (<b>10</b>) was introduced and 30 mol% of Tf<sub>2</sub>O (50 μL) was added dropwise. The vessel was placed in the microwave synthesizer and left at 150 °C for 1 hour at 150 W microwave power, with a pressure of 300 psi (20.7 bar), high mixing, and PowerMax enabled. After cooling to room temperature, 3 mL of heptane were added, and the mixture was stirred for 30 minutes. The product (<b>11</b>) was then isolated by filtration as a white powder (101 mg, isolated yield 99%).</p> |                                                    |                                                               |              |                   |        |
| <b>Mol Formula</b>                                                                                                                                                                                                                                                                                                                                                                                                                                                                                                                                                                                                                                                                                                                                                 |                                                    | C <sub>18</sub> H <sub>18</sub> B <sub>3</sub> N <sub>3</sub> |              | <b>m.p.</b>       | 175 °C |
| <b><sup>1</sup>H NMR</b><br>400 MHz<br>CDCl <sub>3</sub>                                                                                                                                                                                                                                                                                                                                                                                                                                                                                                                                                                                                                                                                                                           | <b>δ value</b>                                     | <b>No. H</b>                                                  | <b>Mult.</b> | <b>j value/Hz</b> |        |
|                                                                                                                                                                                                                                                                                                                                                                                                                                                                                                                                                                                                                                                                                                                                                                    | 5.91                                               | 3                                                             | <i>s</i>     | -                 |        |
|                                                                                                                                                                                                                                                                                                                                                                                                                                                                                                                                                                                                                                                                                                                                                                    | 7.46-7.48                                          | 9                                                             | <i>m</i>     | -                 |        |
|                                                                                                                                                                                                                                                                                                                                                                                                                                                                                                                                                                                                                                                                                                                                                                    | 7.78-7.80                                          | 6                                                             | <i>m</i>     | -                 |        |
| <p><b><sup>13</sup>C NMR</b> (100.6 MHz, CDCl<sub>3</sub>) δ: 131.94, 130.03, 128.22. The signal for the carbon atom attached to boron atom was not detected because of the quadrupolar relaxation of the boron atom.</p>                                                                                                                                                                                                                                                                                                                                                                                                                                                                                                                                          |                                                    |                                                               |              |                   |        |
| <p><b><sup>11</sup>B NMR</b> (128 MHz, CDCl<sub>3</sub>) δ: 33.55</p>                                                                                                                                                                                                                                                                                                                                                                                                                                                                                                                                                                                                                                                                                              |                                                    |                                                               |              |                   |        |

| Chem. Name                                                                                                                                                                                                                                                                                                                                                                                                                                                                                                                                                                                                                                                                                                                                                                                | <b><i>B,B',B''</i>-tri(4-(trifluoromethyl)phenyl)borazine (11a)</b> |                                                                                             |              |                   |        |
|-------------------------------------------------------------------------------------------------------------------------------------------------------------------------------------------------------------------------------------------------------------------------------------------------------------------------------------------------------------------------------------------------------------------------------------------------------------------------------------------------------------------------------------------------------------------------------------------------------------------------------------------------------------------------------------------------------------------------------------------------------------------------------------------|---------------------------------------------------------------------|---------------------------------------------------------------------------------------------|--------------|-------------------|--------|
| <div style="text-align: center;"> 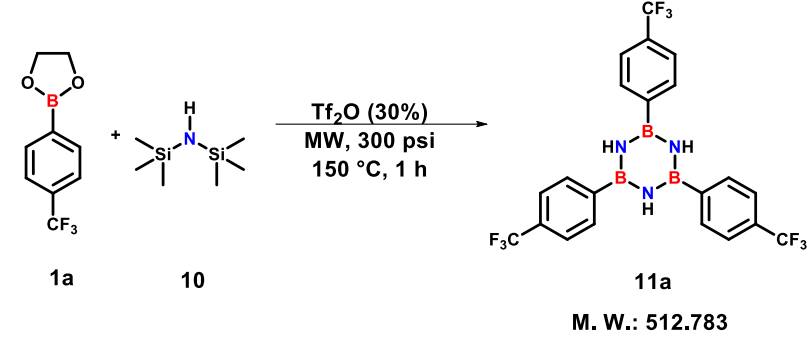 <p><b>1a</b>                      <b>10</b>                      <b>11a</b></p> <p><b>M. W.: 512.783</b></p> </div>                                                                                                                                                                                                                                                                                                                                                                                                                                                                                                                                                  |                                                                     |                                                                                             |              |                   |        |
| <p><b>METHOD:</b> A microwave vessel, pre-dried in oven, was evacuated and flushed with argon. To the vessel, 1 mmol of 2-(4-(trifluoromethyl)phenyl)-1,3,2-dioxaborolane (<b>1a</b>, 216 mg) was added, followed by another cycle of evacuation and argon filling. Next, 1 mL of HMDS (<b>10</b>) was introduced and 30 mol% of Tf<sub>2</sub>O (50 μL) was added dropwise. The vessel was placed in the microwave synthesizer and left at 150 °C for 1 hour at 150 W microwave power, with a pressure of 300 psi (20.7 bar), high mixing, and PowerMax enabled. After cooling to room temperature, 3 mL of heptane were added, and the mixture was stirred for 30 minutes. The product (<b>11a</b>) was then isolated by filtration as a white powder (166 mg, isolated yield 98%).</p> |                                                                     |                                                                                             |              |                   |        |
| <b>Mol Formula</b>                                                                                                                                                                                                                                                                                                                                                                                                                                                                                                                                                                                                                                                                                                                                                                        |                                                                     | C <sub>21</sub> H <sub>15</sub> B <sub>3</sub> N <sub>3</sub> F <sub>9</sub> N <sub>3</sub> |              | <b>m.p.</b>       | 244 °C |
| <b><sup>1</sup>H NMR</b><br><br><b>400 MHz</b><br><br><b>CDCl<sub>3</sub></b>                                                                                                                                                                                                                                                                                                                                                                                                                                                                                                                                                                                                                                                                                                             | <b>δ value</b>                                                      | <b>No. H</b>                                                                                | <b>Mult.</b> | <b>j value/Hz</b> |        |
|                                                                                                                                                                                                                                                                                                                                                                                                                                                                                                                                                                                                                                                                                                                                                                                           | 5.94                                                                | 3                                                                                           | s            | -                 |        |
|                                                                                                                                                                                                                                                                                                                                                                                                                                                                                                                                                                                                                                                                                                                                                                                           | 7.73                                                                | 6                                                                                           | d            | 7.81              |        |
| 7.88                                                                                                                                                                                                                                                                                                                                                                                                                                                                                                                                                                                                                                                                                                                                                                                      |                                                                     | 6                                                                                           | d            | 7.75              |        |
| <p><b><sup>13</sup>C NMR</b> (100.6 MHz, CDCl<sub>3</sub>) δ: 132.23, 132.07 (q, <sup>2</sup>J<sub>C-F</sub>=32.8 Hz), 124.99 (q, <sup>3</sup>J<sub>C-F</sub> = 3.8 Hz), 124.13 (q, <sup>1</sup>J<sub>C-F</sub>=272.2 Hz). The signal for the carbon atom attached to boron atom was not detected because of the quadrupolar relaxation of the boron atom.</p>                                                                                                                                                                                                                                                                                                                                                                                                                            |                                                                     |                                                                                             |              |                   |        |
| <p><b><sup>11</sup>B NMR</b> (128 MHz, CDCl<sub>3</sub>) δ: 33.42</p>                                                                                                                                                                                                                                                                                                                                                                                                                                                                                                                                                                                                                                                                                                                     |                                                                     |                                                                                             |              |                   |        |
| <p><b><sup>19</sup>F NMR</b> (376.4 MHz, CDCl<sub>3</sub>) δ: -62.88</p>                                                                                                                                                                                                                                                                                                                                                                                                                                                                                                                                                                                                                                                                                                                  |                                                                     |                                                                                             |              |                   |        |

| Chem. Name                                                                                                                                                                                                                                                                                                                                                                                                                                                                                                                                                                                                                                                                                                                                                                      | <i>B,B',B''</i> -tri(4-fluorophenyl)borazine ( <b>11b</b> )                  |              |              |                   |        |
|---------------------------------------------------------------------------------------------------------------------------------------------------------------------------------------------------------------------------------------------------------------------------------------------------------------------------------------------------------------------------------------------------------------------------------------------------------------------------------------------------------------------------------------------------------------------------------------------------------------------------------------------------------------------------------------------------------------------------------------------------------------------------------|------------------------------------------------------------------------------|--------------|--------------|-------------------|--------|
| <p style="text-align: center;"><b>11b</b><br/>M. W.: 362.760</p>                                                                                                                                                                                                                                                                                                                                                                                                                                                                                                                                                                                                                                                                                                                |                                                                              |              |              |                   |        |
| <b>METHOD:</b> A microwave vessel, pre-dried in oven, was evacuated and flushed with argon. To the vessel, 1 mmol of 2-(4-fluorophenyl)-1,3,2-dioxaborolane ( <b>1b</b> , 166 mg) was added, followed by another cycle of evacuation and argon filling. Next, 1 mL of HMDS ( <b>10</b> ) was introduced and 30 mol% of Tf <sub>2</sub> O (50 μL) was added dropwise. The vessel was placed in the microwave synthesizer and left at 150 °C for 1 hour at 150 W microwave power, with a pressure of 300 psi (20.7 bar), high mixing, and PowerMax enabled. After cooling to room temperature, 3 mL of heptane were added, and the mixture was stirred for 30 minutes. The product ( <b>11b</b> ) was then isolated by filtration as a white powder (108 mg, isolated yield 90%). |                                                                              |              |              |                   |        |
| <b>Mol Formula</b>                                                                                                                                                                                                                                                                                                                                                                                                                                                                                                                                                                                                                                                                                                                                                              | C <sub>18</sub> H <sub>15</sub> B <sub>3</sub> F <sub>3</sub> N <sub>3</sub> |              |              | <b>m.p.</b>       | 269 °C |
| <b><sup>1</sup>H NMR</b><br>400<br>MHz<br>CDCl <sub>3</sub>                                                                                                                                                                                                                                                                                                                                                                                                                                                                                                                                                                                                                                                                                                                     | <b>δ value</b>                                                               | <b>No. H</b> | <b>Mult.</b> | <b>j value/Hz</b> |        |
|                                                                                                                                                                                                                                                                                                                                                                                                                                                                                                                                                                                                                                                                                                                                                                                 | 5.78                                                                         | 3            | <i>s</i>     | -                 |        |
|                                                                                                                                                                                                                                                                                                                                                                                                                                                                                                                                                                                                                                                                                                                                                                                 | 7.14-7.18                                                                    | 6            | <i>m</i>     | -                 |        |
|                                                                                                                                                                                                                                                                                                                                                                                                                                                                                                                                                                                                                                                                                                                                                                                 | 7.74-7.77                                                                    | 6            | <i>m</i>     | -                 |        |
| <b><sup>13</sup>C NMR</b> (100.6 MHz, CDCl <sub>3</sub> ) δ: 164.38(d, <sup>1</sup> J <sub>C-F</sub> =249.24Hz), 133.91 (d, <sup>3</sup> J <sub>C-F</sub> =7.82Hz), 115.33 (d, <sup>2</sup> J <sub>C-F</sub> =20.13Hz). The signal for the carbon atom attached to boron atom was not detected because of the quadrupolar relaxation of the boron atom.                                                                                                                                                                                                                                                                                                                                                                                                                         |                                                                              |              |              |                   |        |
| <b><sup>11</sup>B NMR</b> (128 MHz, CDCl <sub>3</sub> ) δ: 33.20                                                                                                                                                                                                                                                                                                                                                                                                                                                                                                                                                                                                                                                                                                                |                                                                              |              |              |                   |        |
| <b><sup>19</sup>F NMR</b> (376.4 MHz, CDCl <sub>3</sub> ) δ: -110.56                                                                                                                                                                                                                                                                                                                                                                                                                                                                                                                                                                                                                                                                                                            |                                                                              |              |              |                   |        |

| Chem. Name                                                                                                                                                                                                                                                                                                                                                                                                                                                                                                                                                                                                                                                                                                                                                                     |                                                                               | <i>B,B',B''</i> -tri(4-chlorophenyl)borazine ( <b>11c</b> ) |              |                   |        |
|--------------------------------------------------------------------------------------------------------------------------------------------------------------------------------------------------------------------------------------------------------------------------------------------------------------------------------------------------------------------------------------------------------------------------------------------------------------------------------------------------------------------------------------------------------------------------------------------------------------------------------------------------------------------------------------------------------------------------------------------------------------------------------|-------------------------------------------------------------------------------|-------------------------------------------------------------|--------------|-------------------|--------|
| <p style="text-align: center;"><b>1c</b>                      <b>10</b>                      <b>11c</b></p> <p style="text-align: center;"><b>M. W.: 412.124</b></p>                                                                                                                                                                                                                                                                                                                                                                                                                                                                                                                                                                                                           |                                                                               |                                                             |              |                   |        |
| <b>METHOD:</b> A microwave vessel, pre-dried in oven, was evacuated and flushed with argon. To the vessel, 1 mmol of 2-(4-chlorophenyl)-1,3,2-dioxaborolane ( <b>1c</b> , 182 mg) was added, followed by another cycle of evacuation and argon filling. Next, 1 mL of HMDS ( <b>10</b> ) was introduced and 30 mol% of Tf <sub>2</sub> O (50 μL) was added dropwise. The vessel was placed in the microwave synthesizer and left at 150 °C for 1 hour at 150 W microwave power, with a pressure of 300 psi (20.7 bar), high mixing, and PowerMax enabled. After cooling to room temperature, 3 mL of heptane were added, and the mixture was stirred for 30 minutes. The product ( <b>11c</b> ) was then isolated by filtration as a white powder (90 mg, isolated yield 66%). |                                                                               |                                                             |              |                   |        |
| <b>Mol Formula</b>                                                                                                                                                                                                                                                                                                                                                                                                                                                                                                                                                                                                                                                                                                                                                             | C <sub>18</sub> H <sub>15</sub> B <sub>3</sub> Cl <sub>3</sub> N <sub>3</sub> |                                                             |              | <b>m.p.</b>       | 260 °C |
| <b><sup>1</sup>H NMR</b><br>400<br>MHz<br>CDCl <sub>3</sub>                                                                                                                                                                                                                                                                                                                                                                                                                                                                                                                                                                                                                                                                                                                    | <b>δ value</b>                                                                | <b>No. H</b>                                                | <b>Mult.</b> | <b>j value/Hz</b> |        |
|                                                                                                                                                                                                                                                                                                                                                                                                                                                                                                                                                                                                                                                                                                                                                                                | 5.82                                                                          | 3                                                           | <i>s</i>     | -                 |        |
|                                                                                                                                                                                                                                                                                                                                                                                                                                                                                                                                                                                                                                                                                                                                                                                | 7.47                                                                          | 6                                                           | <i>d</i>     | 8.18              |        |
|                                                                                                                                                                                                                                                                                                                                                                                                                                                                                                                                                                                                                                                                                                                                                                                | 7.71                                                                          | 6                                                           | <i>d</i>     | 8.25              |        |
| <b><sup>13</sup>C NMR</b> (100.6 MHz, CDCl <sub>3</sub> ) δ: 136.44, 133.30, 128.51. The signal for the carbon atom attached to boron atom was not detected because of the quadrupolar relaxation of the boron atom.                                                                                                                                                                                                                                                                                                                                                                                                                                                                                                                                                           |                                                                               |                                                             |              |                   |        |
| <b><sup>11</sup>B NMR</b> (128 MHz, CDCl <sub>3</sub> ) δ: 33.23                                                                                                                                                                                                                                                                                                                                                                                                                                                                                                                                                                                                                                                                                                               |                                                                               |                                                             |              |                   |        |

| Chem. Name                                                                                                                                                                                                                                                                                                                                                                                                                                                                                                                                                                                                                                                                                                                                                                     |                | <i>B,B',B''</i> -tri(4-bromophenyl)borazine ( <b>11d</b> )                    |              |                   |        |
|--------------------------------------------------------------------------------------------------------------------------------------------------------------------------------------------------------------------------------------------------------------------------------------------------------------------------------------------------------------------------------------------------------------------------------------------------------------------------------------------------------------------------------------------------------------------------------------------------------------------------------------------------------------------------------------------------------------------------------------------------------------------------------|----------------|-------------------------------------------------------------------------------|--------------|-------------------|--------|
| <p style="text-align: center;"><b>11d</b><br/>M. W.: 545.477</p>                                                                                                                                                                                                                                                                                                                                                                                                                                                                                                                                                                                                                                                                                                               |                |                                                                               |              |                   |        |
| <b>METHOD:</b> A microwave vessel, pre-dried in oven, was evacuated and flushed with argon. To the vessel, 1 mmol of 2-(4-bromophenyl)-1,3,2-dioxaborolane ( <b>1d</b> , 227 mg) was added, followed by another cycle of evacuation and argon filling. Next, 1 mL of HMDS ( <b>10</b> ) was introduced and 30 mol% of Tf <sub>2</sub> O (50 μL) was added dropwise. The vessel was placed in the microwave synthesizer and left at 150 °C for 1 hour at 150 W microwave power, with a pressure of 300 psi (20.7 bar), high mixing, and PowerMax enabled. After cooling to room temperature, 3 mL of heptane were added, and the mixture was stirred for 30 minutes. The product ( <b>11d</b> ) was then isolated by filtration as a white powder (164 mg, isolated yield 91%). |                |                                                                               |              |                   |        |
| <b>Mol Formula</b>                                                                                                                                                                                                                                                                                                                                                                                                                                                                                                                                                                                                                                                                                                                                                             |                | C <sub>18</sub> H <sub>15</sub> B <sub>3</sub> Br <sub>3</sub> N <sub>3</sub> |              | <b>m.p.</b>       | 275 °C |
| <b><sup>1</sup>H NMR</b><br>400<br>MHz<br>CDCl <sub>3</sub>                                                                                                                                                                                                                                                                                                                                                                                                                                                                                                                                                                                                                                                                                                                    | <b>δ value</b> | <b>No. H</b>                                                                  | <b>Mult.</b> | <b>j value/Hz</b> |        |
|                                                                                                                                                                                                                                                                                                                                                                                                                                                                                                                                                                                                                                                                                                                                                                                | 5.80           | 3                                                                             | s            | -                 |        |
|                                                                                                                                                                                                                                                                                                                                                                                                                                                                                                                                                                                                                                                                                                                                                                                | 7.59-7.63      | 12                                                                            | m            | -                 |        |
| <b><sup>13</sup>C NMR</b> (100.6 MHz, CDCl <sub>3</sub> ) δ: 133.52, 131.45, 124.94. The signal for the carbon atom attached to boron atom was not detected because of the quadrupolar relaxation of the boron atom.                                                                                                                                                                                                                                                                                                                                                                                                                                                                                                                                                           |                |                                                                               |              |                   |        |
| <b><sup>11</sup>B NMR</b> (128 MHz, CDCl <sub>3</sub> ) δ: 33.24                                                                                                                                                                                                                                                                                                                                                                                                                                                                                                                                                                                                                                                                                                               |                |                                                                               |              |                   |        |

| Chem. Name                                                                                                                                                                                                                                                                                                                                                                                                                                                                                                                                                                                                                                                                                                                                                                   | <b><i>B,B',B''</i>-tri(4-iodophenyl)borazine (11e)</b>                       |              |              |                   |        |
|------------------------------------------------------------------------------------------------------------------------------------------------------------------------------------------------------------------------------------------------------------------------------------------------------------------------------------------------------------------------------------------------------------------------------------------------------------------------------------------------------------------------------------------------------------------------------------------------------------------------------------------------------------------------------------------------------------------------------------------------------------------------------|------------------------------------------------------------------------------|--------------|--------------|-------------------|--------|
| <div style="text-align: center;"> 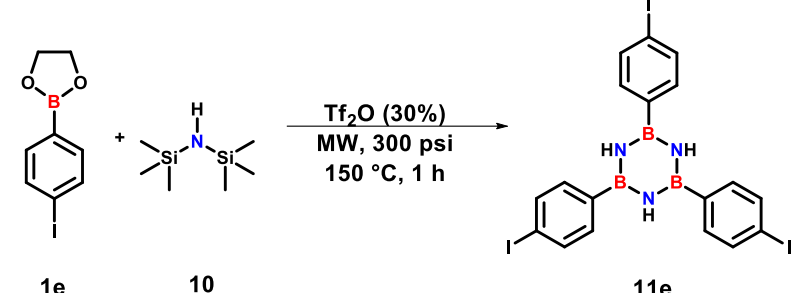 <p data-bbox="478 492 1117 526"><b>1e</b>                      <b>10</b>                                              <b>11e</b></p> <p data-bbox="1005 537 1181 571"><b>M. W.: 686.478</b></p> </div>                                                                                                                                                                                                                                                                                                                                                                                                                                                  |                                                                              |              |              |                   |        |
| <p><b>METHOD:</b> A microwave vessel, pre-dried in oven, was evacuated and flushed with argon. To the vessel, 1 mmol of 2-(4-iodophenyl)-1,3,2-dioxaborolane (<b>1e</b>, 274 mg) was added, followed by another cycle of evacuation and argon filling. Next, 1 mL of HMDS (<b>10</b>) was introduced and 30 mol% of Tf<sub>2</sub>O (50 μL) was added dropwise. The vessel was placed in the microwave synthesizer and left at 150 °C for 1 hour at 150 W microwave power, with a pressure of 300 psi (20.7 bar), high mixing, and PowerMax enabled. After cooling to room temperature, 3 mL of heptane were added, and the mixture was stirred for 30 minutes. The product (<b>11e</b>) was then isolated by filtration as a white powder (201 mg, isolated yield 89%).</p> |                                                                              |              |              |                   |        |
| <b>Mol Formula</b>                                                                                                                                                                                                                                                                                                                                                                                                                                                                                                                                                                                                                                                                                                                                                           | C <sub>18</sub> H <sub>15</sub> B <sub>3</sub> I <sub>3</sub> N <sub>3</sub> |              |              | <b>m.p.</b>       | 260 °C |
| <b><sup>1</sup>H NMR</b><br><b>400</b><br><b>MHz</b><br><b>CDCl<sub>3</sub></b>                                                                                                                                                                                                                                                                                                                                                                                                                                                                                                                                                                                                                                                                                              | <b>δ value</b>                                                               | <b>No. H</b> | <b>Mult.</b> | <b>j value/Hz</b> |        |
|                                                                                                                                                                                                                                                                                                                                                                                                                                                                                                                                                                                                                                                                                                                                                                              | 5.79                                                                         | 3            | <i>s</i>     | -                 |        |
|                                                                                                                                                                                                                                                                                                                                                                                                                                                                                                                                                                                                                                                                                                                                                                              | 7.47                                                                         | 6            | <i>d</i>     | 7.97              |        |
| 7.81                                                                                                                                                                                                                                                                                                                                                                                                                                                                                                                                                                                                                                                                                                                                                                         | 6                                                                            | <i>d</i>     | 8.04         |                   |        |
| <p><b><sup>13</sup>C NMR</b> (100.6 MHz, CDCl<sub>3</sub>) δ: 137.39, 133.56, 97.14. The signal for the carbon atom attached to boron atom was not detected because of the quadrupolar relaxation of the boron atom.</p>                                                                                                                                                                                                                                                                                                                                                                                                                                                                                                                                                     |                                                                              |              |              |                   |        |
| <p><b><sup>11</sup>B NMR</b> (128 MHz, CDCl<sub>3</sub>) δ: 33.22</p>                                                                                                                                                                                                                                                                                                                                                                                                                                                                                                                                                                                                                                                                                                        |                                                                              |              |              |                   |        |

| Chem. Name                                                                                                                                                                                                                                                                                                                                                                                                                                                                                                                                                                                                                                                                                                                                                                               |                | <i>B,B',B''</i> -tri(4- diphenylaminophenyl)borazine ( <b>11f</b> ) |              |                   |        |
|------------------------------------------------------------------------------------------------------------------------------------------------------------------------------------------------------------------------------------------------------------------------------------------------------------------------------------------------------------------------------------------------------------------------------------------------------------------------------------------------------------------------------------------------------------------------------------------------------------------------------------------------------------------------------------------------------------------------------------------------------------------------------------------|----------------|---------------------------------------------------------------------|--------------|-------------------|--------|
| <p style="text-align: center;"><b>M. W.: 810.408</b></p>                                                                                                                                                                                                                                                                                                                                                                                                                                                                                                                                                                                                                                                                                                                                 |                |                                                                     |              |                   |        |
| <b>METHOD:</b> A microwave vessel, pre-dried in oven, was evacuated and flushed with argon. To the vessel, 1 mmol of 2-(4-(diphenylamino)phenyl)-1,3,2-dioxaborolane ( <b>1f</b> , 315 mg) was added, followed by another cycle of evacuation and argon filling. Next, 1 mL of HMDS ( <b>10</b> ) was introduced and 30 mol% of Tf <sub>2</sub> O (50 μL) was added dropwise. The vessel was placed in the microwave synthesizer and left at 150 °C for 1 hour at 150 W microwave power, with a pressure of 300 psi (20.7 bar), high mixing, and PowerMax enabled. After cooling to room temperature, 3 mL of heptane were added, and the mixture was stirred for 30 minutes. The product ( <b>11f</b> ) was then isolated by filtration as a white powder (201 mg, isolated yield 75%). |                |                                                                     |              |                   |        |
| <b>Mol Formula</b>                                                                                                                                                                                                                                                                                                                                                                                                                                                                                                                                                                                                                                                                                                                                                                       |                | C <sub>54</sub> H <sub>45</sub> B <sub>3</sub> N <sub>6</sub>       |              | <b>m.p.</b>       | 268 °C |
| <b><sup>1</sup>H NMR</b><br>400<br>MHz<br>CDCl <sub>3</sub>                                                                                                                                                                                                                                                                                                                                                                                                                                                                                                                                                                                                                                                                                                                              | <b>δ value</b> | <b>No. H</b>                                                        | <b>Mult.</b> | <b>j value/Hz</b> |        |
|                                                                                                                                                                                                                                                                                                                                                                                                                                                                                                                                                                                                                                                                                                                                                                                          | 5.75           | 3                                                                   | <i>s</i>     | -                 |        |
|                                                                                                                                                                                                                                                                                                                                                                                                                                                                                                                                                                                                                                                                                                                                                                                          | 7.03-7.14      | 24                                                                  | <i>m</i>     | -                 |        |
|                                                                                                                                                                                                                                                                                                                                                                                                                                                                                                                                                                                                                                                                                                                                                                                          | 7.26-7.29      | 12                                                                  | <i>m</i>     | -                 |        |
|                                                                                                                                                                                                                                                                                                                                                                                                                                                                                                                                                                                                                                                                                                                                                                                          | 7.63           | 6                                                                   | <i>d</i>     | 8.39              |        |
| <b><sup>13</sup>C NMR</b> (100.6 MHz, CDCl <sub>3</sub> ) δ 149.53, 147.51, 132.97, 129.32, 124.80, 123.23, 122.55. The signal for the carbon atom attached to boron atom was not detected because of the quadrupolar relaxation of the boron atom.                                                                                                                                                                                                                                                                                                                                                                                                                                                                                                                                      |                |                                                                     |              |                   |        |

| Chem. Name                                                                                                                                                                                                                                                                                                                                                                                                                                                                                                                                                                                                                                                                                                                                                                           | <i>B,B',B''</i> -tri(4-methoxyphenyl)borazine ( <b>11g</b> )                 |              |              |                   |        |
|--------------------------------------------------------------------------------------------------------------------------------------------------------------------------------------------------------------------------------------------------------------------------------------------------------------------------------------------------------------------------------------------------------------------------------------------------------------------------------------------------------------------------------------------------------------------------------------------------------------------------------------------------------------------------------------------------------------------------------------------------------------------------------------|------------------------------------------------------------------------------|--------------|--------------|-------------------|--------|
| <p style="text-align: center;"><b>1g</b>                      <b>10</b>                      <b>11g</b></p> <p style="text-align: center;"><b>M. W.: 398.867</b></p>                                                                                                                                                                                                                                                                                                                                                                                                                                                                                                                                                                                                                 |                                                                              |              |              |                   |        |
| <p><b>METHOD:</b> A microwave vessel, pre-dried in oven, was evacuated and flushed with argon. To the vessel, 1 mmol of 2-(4-methoxyphenyl)-1,3,2-dioxaborolane (<b>1g</b>, 178 mg) was added, followed by another cycle of evacuation and argon filling. Next, 1 mL of HMDS (<b>10</b>) was introduced and 30 mol% of Tf<sub>2</sub>O (50 μL) was added dropwise. The vessel was placed in the microwave synthesizer and subjected to 150 °C for 1 hour at 150 W microwave power, with a pressure of 300 psi (20.7 bar), high mixing, and PowerMax enabled. After cooling to room temperature, 3 mL of heptane were added, and the mixture was stirred for 30 minutes. The product (<b>11g</b>) was then isolated by filtration as a white powder (125 mg, isolated yield 95%).</p> |                                                                              |              |              |                   |        |
| <b>Mol Formula</b>                                                                                                                                                                                                                                                                                                                                                                                                                                                                                                                                                                                                                                                                                                                                                                   | C <sub>21</sub> H <sub>24</sub> B <sub>3</sub> N <sub>3</sub> O <sub>3</sub> |              |              | <b>m.p.</b>       | 160 °C |
| <b><sup>1</sup>H NMR</b><br>400<br>MHz<br>CDCl <sub>3</sub>                                                                                                                                                                                                                                                                                                                                                                                                                                                                                                                                                                                                                                                                                                                          | <b>δ value</b>                                                               | <b>No. H</b> | <b>Mult.</b> | <b>j value/Hz</b> |        |
|                                                                                                                                                                                                                                                                                                                                                                                                                                                                                                                                                                                                                                                                                                                                                                                      | 3.87                                                                         | 9            | <i>s</i>     | -                 |        |
|                                                                                                                                                                                                                                                                                                                                                                                                                                                                                                                                                                                                                                                                                                                                                                                      | 5.75                                                                         | 3            | <i>s</i>     | -                 |        |
|                                                                                                                                                                                                                                                                                                                                                                                                                                                                                                                                                                                                                                                                                                                                                                                      | 7.00                                                                         | 6            | <i>d</i>     | 8.53              |        |
|                                                                                                                                                                                                                                                                                                                                                                                                                                                                                                                                                                                                                                                                                                                                                                                      | 7.73                                                                         | 6            | <i>d</i>     | 8.55              |        |
| <p><b><sup>13</sup>C NMR</b> (100.6 MHz, CDCl<sub>3</sub>) δ: 161.21, 133.50, 113.75, 55.18. The signal for the carbon atom attached to boron atom was not detected because of the quadrupolar relaxation of the boron atom.</p>                                                                                                                                                                                                                                                                                                                                                                                                                                                                                                                                                     |                                                                              |              |              |                   |        |
| <p><b><sup>11</sup>B NMR</b> (128 MHz, CDCl<sub>3</sub>) δ: 33.81</p>                                                                                                                                                                                                                                                                                                                                                                                                                                                                                                                                                                                                                                                                                                                |                                                                              |              |              |                   |        |

| Chem. Name                                                                                                                                                                                                                                                                                                                                                                                                                                                                                                                                                                                                                                                                                                                                                                                | <b><i>B,B',B''</i>-tri(4-(methylthio)phenyl)borazine (11h)</b>               |              |              |                   |        |
|-------------------------------------------------------------------------------------------------------------------------------------------------------------------------------------------------------------------------------------------------------------------------------------------------------------------------------------------------------------------------------------------------------------------------------------------------------------------------------------------------------------------------------------------------------------------------------------------------------------------------------------------------------------------------------------------------------------------------------------------------------------------------------------------|------------------------------------------------------------------------------|--------------|--------------|-------------------|--------|
| <div style="text-align: center;"> 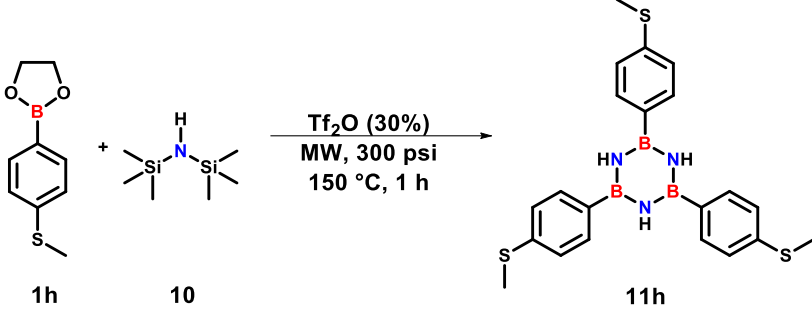 <p style="text-align: center;"><b>1h</b>                      <b>10</b>                      <b>11h</b></p> <p style="text-align: center;"><b>M. W.: 447.063</b></p> </div>                                                                                                                                                                                                                                                                                                                                                                                                                                                                                          |                                                                              |              |              |                   |        |
| <p><b>METHOD:</b> A microwave vessel, pre-dried in oven, was evacuated and flushed with argon. To the vessel, 1 mmol of 2-(4-(methylthio)phenyl)-1,3,2-dioxaborolane (<b>1h</b>, 194 mg) was added, followed by another cycle of evacuation and argon filling. Next, 1 mL of HMDS (<b>10</b>) was introduced and 30 mol% of Tf<sub>2</sub>O (50 μL) was added dropwise. The vessel was placed in the microwave synthesizer and subjected to 150 °C for 1 hour at 150 W microwave power, with a pressure of 300 psi (20.7 bar), high mixing, and PowerMax enabled. After cooling to room temperature, 3 mL of heptane were added, and the mixture was stirred for 30 minutes. The product (<b>11h</b>) was then isolated by filtration as a white powder (143 mg, isolated yield 97%).</p> |                                                                              |              |              |                   |        |
| <b>Mol Formula</b>                                                                                                                                                                                                                                                                                                                                                                                                                                                                                                                                                                                                                                                                                                                                                                        | C <sub>21</sub> H <sub>24</sub> B <sub>3</sub> N <sub>3</sub> S <sub>3</sub> |              |              | <b>m.p.</b>       | 197 °C |
| <b><sup>1</sup>H NMR</b><br><b>400</b><br><b>MHz</b><br><b>CDCl<sub>3</sub></b>                                                                                                                                                                                                                                                                                                                                                                                                                                                                                                                                                                                                                                                                                                           | <b>δ value</b>                                                               | <b>No. H</b> | <b>Mult.</b> | <b>j value/Hz</b> |        |
|                                                                                                                                                                                                                                                                                                                                                                                                                                                                                                                                                                                                                                                                                                                                                                                           | 2.53                                                                         | 9            | <i>s</i>     | -                 |        |
|                                                                                                                                                                                                                                                                                                                                                                                                                                                                                                                                                                                                                                                                                                                                                                                           | 5.80                                                                         | 3            | <i>s</i>     | -                 |        |
|                                                                                                                                                                                                                                                                                                                                                                                                                                                                                                                                                                                                                                                                                                                                                                                           | 7.34                                                                         | 6            | <i>d</i>     | 8.15              |        |
| 7.68                                                                                                                                                                                                                                                                                                                                                                                                                                                                                                                                                                                                                                                                                                                                                                                      | 6                                                                            | <i>d</i>     | 8.18         |                   |        |
| <p><b><sup>13</sup>C NMR</b> (100.6 MHz, CDCl<sub>3</sub>) δ: 141.03, 132.37, 125.80, 15.34. The signal for the carbon atom attached to boron atom was not detected because of the quadrupolar relaxation of the boron atom.</p>                                                                                                                                                                                                                                                                                                                                                                                                                                                                                                                                                          |                                                                              |              |              |                   |        |
| <p><b><sup>11</sup>B NMR</b> (128 MHz, CDCl<sub>3</sub>) δ: 33.26</p>                                                                                                                                                                                                                                                                                                                                                                                                                                                                                                                                                                                                                                                                                                                     |                                                                              |              |              |                   |        |

| Chem. Name                                                                                                                                                                                                                                                                                                                                                                                                                                                                                                                                                                                                                                                                                                                                                                                     | <b><i>B,B',B''</i>-tri(4-<i>tert</i>-butylphenyl)borazine (11i)</b> |              |              |                    |
|------------------------------------------------------------------------------------------------------------------------------------------------------------------------------------------------------------------------------------------------------------------------------------------------------------------------------------------------------------------------------------------------------------------------------------------------------------------------------------------------------------------------------------------------------------------------------------------------------------------------------------------------------------------------------------------------------------------------------------------------------------------------------------------------|---------------------------------------------------------------------|--------------|--------------|--------------------|
| 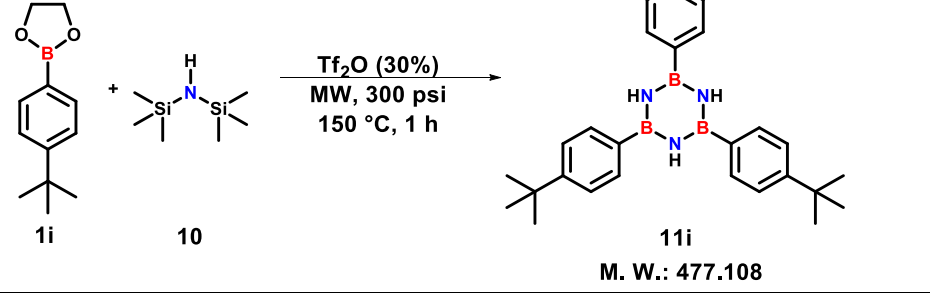 <p style="text-align: center;">M. W.: 477.108</p>                                                                                                                                                                                                                                                                                                                                                                                                                                                                                                                                                                                                                                                           |                                                                     |              |              |                    |
| <p><b>METHOD:</b> A microwave vessel, pre-dried in oven, was evacuated and flushed with argon. To the vessel, 1 mmol of 2-(4-<i>tert</i>-butylphenyl)-1,3,2-dioxaborolane (<b>1i</b>, 204 mg) was added, followed by another cycle of evacuation and argon filling. Next, 1 mL of HMDS (<b>10</b>) was introduced and 30 mol% of Tf<sub>2</sub>O (50 μL) was added dropwise. The vessel was placed in the microwave synthesizer and subjected to 150 °C for 1 hour at 150 W microwave power, with a pressure of 300 psi (20.7 bar), high mixing, and PowerMax enabled. After cooling to room temperature, 3 mL of heptane were added, and the mixture was stirred for 30 minutes. The product (<b>11i</b>) was then isolated by filtration as a white powder (140 mg, isolated yield 89%).</p> |                                                                     |              |              |                    |
| <b>Mol Formula</b>                                                                                                                                                                                                                                                                                                                                                                                                                                                                                                                                                                                                                                                                                                                                                                             | C <sub>30</sub> H <sub>42</sub> B <sub>3</sub> N <sub>3</sub>       |              |              | <b>m.p.</b> 230 °C |
| <b><sup>1</sup>H NMR</b><br>400<br>MHz<br>CDCl <sub>3</sub>                                                                                                                                                                                                                                                                                                                                                                                                                                                                                                                                                                                                                                                                                                                                    | <b>δ value</b>                                                      | <b>No. H</b> | <b>Mult.</b> | <b>j value/Hz</b>  |
|                                                                                                                                                                                                                                                                                                                                                                                                                                                                                                                                                                                                                                                                                                                                                                                                | 1.37                                                                | 27           | <i>s</i>     | -                  |
|                                                                                                                                                                                                                                                                                                                                                                                                                                                                                                                                                                                                                                                                                                                                                                                                | 5.85                                                                | 3            | <i>s</i>     | -                  |
|                                                                                                                                                                                                                                                                                                                                                                                                                                                                                                                                                                                                                                                                                                                                                                                                | 7.50                                                                | 6            | <i>d</i>     | 8.1                |
| 7.72                                                                                                                                                                                                                                                                                                                                                                                                                                                                                                                                                                                                                                                                                                                                                                                           | 6                                                                   | <i>d</i>     | 8.0          |                    |
| <p><b><sup>13</sup>C NMR</b> (100.6 MHz, CDCl<sub>3</sub>) δ: 153.07, 131.85, 125.15, 34.79, 31.29. The signal for the carbon atom attached to boron atom was not detected because of the quadrupolar relaxation of the boron atom.</p>                                                                                                                                                                                                                                                                                                                                                                                                                                                                                                                                                        |                                                                     |              |              |                    |
| <p><b><sup>11</sup>B NMR</b> (128 MHz, CDCl<sub>3</sub>) δ: 33.51</p>                                                                                                                                                                                                                                                                                                                                                                                                                                                                                                                                                                                                                                                                                                                          |                                                                     |              |              |                    |

| Chem. Name                                                                                                                                                                                                                                                                                                                                                                                                                                                                                                                                                                                                                                                                                                                                                                          | <b><i>B,B',B''</i>-tri(4-methylphenyl)borazine (11j)</b> |                                                               |              |                   |        |
|-------------------------------------------------------------------------------------------------------------------------------------------------------------------------------------------------------------------------------------------------------------------------------------------------------------------------------------------------------------------------------------------------------------------------------------------------------------------------------------------------------------------------------------------------------------------------------------------------------------------------------------------------------------------------------------------------------------------------------------------------------------------------------------|----------------------------------------------------------|---------------------------------------------------------------|--------------|-------------------|--------|
| <div style="text-align: center;"> 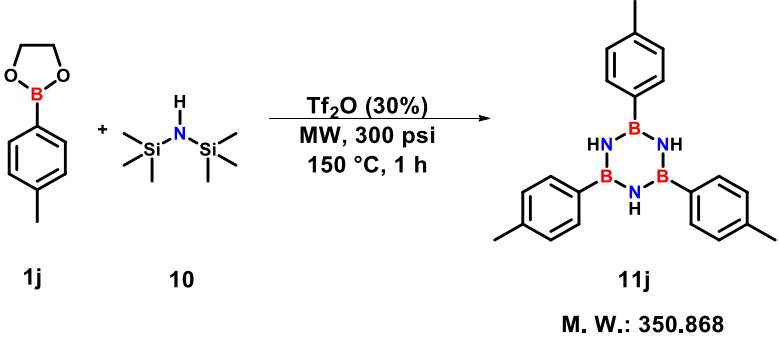 <p>1j                      10                      11j</p> <p>M. W.: 350.868</p> </div>                                                                                                                                                                                                                                                                                                                                                                                                                                                                                                                                                                        |                                                          |                                                               |              |                   |        |
| <p><b>METHOD:</b> A microwave vessel, pre-dried in oven, was evacuated and flushed with argon. To the vessel, 1 mmol of 2-(4-methylphenyl)-1,3,2-dioxaborolane (<b>1j</b>, 162 mg) was added, followed by another cycle of evacuation and argon filling. Next, 1 mL of HMDS (<b>10</b>) was introduced and 30 mol% of Tf<sub>2</sub>O (50 μL) was added dropwise. The vessel was placed in the microwave synthesizer and subjected to 150 °C for 1 hour at 150 W microwave power, with a pressure of 300 psi (20.7 bar), high mixing, and PowerMax enabled. After cooling to room temperature, 3 mL of heptane were added, and the mixture was stirred for 30 minutes. The product (<b>11j</b>) was then isolated by filtration as a white powder (113 mg, isolated yield 98%).</p> |                                                          |                                                               |              |                   |        |
| <b>Mol Formula</b>                                                                                                                                                                                                                                                                                                                                                                                                                                                                                                                                                                                                                                                                                                                                                                  |                                                          | C <sub>21</sub> H <sub>24</sub> B <sub>3</sub> N <sub>3</sub> |              | <b>m.p.</b>       | 197 °C |
| <b><sup>1</sup>H NMR</b><br>400<br>MHz<br>CDCl <sub>3</sub>                                                                                                                                                                                                                                                                                                                                                                                                                                                                                                                                                                                                                                                                                                                         | <b>δ value</b>                                           | <b>No. H</b>                                                  | <b>Mult.</b> | <b>j value/Hz</b> |        |
|                                                                                                                                                                                                                                                                                                                                                                                                                                                                                                                                                                                                                                                                                                                                                                                     | 2.42                                                     | 9                                                             | s            | -                 |        |
|                                                                                                                                                                                                                                                                                                                                                                                                                                                                                                                                                                                                                                                                                                                                                                                     | 5.84                                                     | 3                                                             | s            | -                 |        |
|                                                                                                                                                                                                                                                                                                                                                                                                                                                                                                                                                                                                                                                                                                                                                                                     | 7.28                                                     | 6                                                             | d            | 7.56              |        |
|                                                                                                                                                                                                                                                                                                                                                                                                                                                                                                                                                                                                                                                                                                                                                                                     | 7.69                                                     | 6                                                             | d            | 7.65              |        |
| <p><b><sup>13</sup>C NMR</b> (100.6 MHz, CDCl<sub>3</sub>) δ: 139.96, 132.00, 128.97, 21.56. The signal for the carbon atom attached to boron atom was not detected because of the quadrupolar relaxation of the boron atom.</p>                                                                                                                                                                                                                                                                                                                                                                                                                                                                                                                                                    |                                                          |                                                               |              |                   |        |
| <p><b><sup>11</sup>B NMR</b> (128 MHz, CDCl<sub>3</sub>) δ: 33.22</p>                                                                                                                                                                                                                                                                                                                                                                                                                                                                                                                                                                                                                                                                                                               |                                                          |                                                               |              |                   |        |

| Chem. Name                                                                                                                                                                                                                                                                                                                                                                                                                                                                                                                                                                                                                                                                                                                                                                               | <b><i>B,B',B''</i>-tri(3-fluorophenyl)borazine (11k)</b> |                                                                              |              |                   |        |
|------------------------------------------------------------------------------------------------------------------------------------------------------------------------------------------------------------------------------------------------------------------------------------------------------------------------------------------------------------------------------------------------------------------------------------------------------------------------------------------------------------------------------------------------------------------------------------------------------------------------------------------------------------------------------------------------------------------------------------------------------------------------------------------|----------------------------------------------------------|------------------------------------------------------------------------------|--------------|-------------------|--------|
| <div style="text-align: center;"> 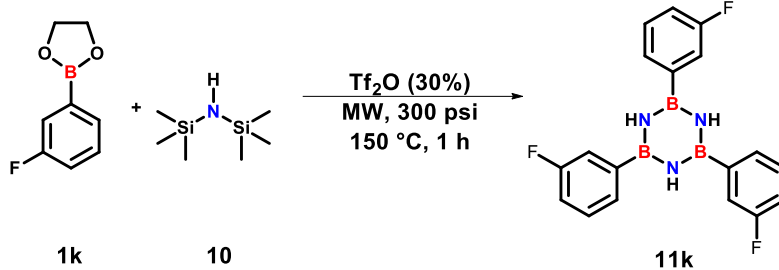 <p style="text-align: center;"><b>11k</b><br/>M. W.: 362.760</p> </div>                                                                                                                                                                                                                                                                                                                                                                                                                                                                                                                                                                                             |                                                          |                                                                              |              |                   |        |
| <p><b>METHOD:</b> A microwave vessel, pre-dried in oven, was evacuated and flushed with argon. To the vessel, 1 mmol of 2-(3-fluorophenyl)-1,3,2-dioxaborolane (<b>1k</b>, 166 mg) was added, followed by another cycle of evacuation and argon filling. Next, 1 mL of HMDS (<b>10</b>) was introduced and 30 mol% of Tf<sub>2</sub>O (50 μL) was added dropwise. The vessel was placed in the microwave synthesizer and subjected to 150 °C for 1 hour at 150 W microwave power, with a pressure of 300 psi (20.7 bar), high mixing, and PowerMax enabled. After cooling to room temperature, 3 mL of heptane were added, and the mixture was stirred for 30 minutes. The product (<b>11k</b>) was then isolated by filtration as an off-white powder (108 mg, isolated yield 90%).</p> |                                                          |                                                                              |              |                   |        |
| <b>Mol Formula</b>                                                                                                                                                                                                                                                                                                                                                                                                                                                                                                                                                                                                                                                                                                                                                                       |                                                          | C <sub>18</sub> H <sub>15</sub> B <sub>3</sub> F <sub>3</sub> N <sub>3</sub> |              | <b>m.p.</b>       | 190 °C |
| <b><sup>1</sup>H NMR</b><br><br>400<br>MHz<br>CDCl <sub>3</sub>                                                                                                                                                                                                                                                                                                                                                                                                                                                                                                                                                                                                                                                                                                                          | <b>δ value</b>                                           | <b>No. H</b>                                                                 | <b>Mult.</b> | <b>j value/Hz</b> |        |
|                                                                                                                                                                                                                                                                                                                                                                                                                                                                                                                                                                                                                                                                                                                                                                                          | 5.84                                                     | 3                                                                            | <i>s</i>     | -                 |        |
|                                                                                                                                                                                                                                                                                                                                                                                                                                                                                                                                                                                                                                                                                                                                                                                          | 7.14-7.12                                                | 3                                                                            | <i>m</i>     | -                 |        |
|                                                                                                                                                                                                                                                                                                                                                                                                                                                                                                                                                                                                                                                                                                                                                                                          | 7.41-7.48                                                | 6                                                                            | <i>m</i>     | -                 |        |
|                                                                                                                                                                                                                                                                                                                                                                                                                                                                                                                                                                                                                                                                                                                                                                                          | 7.52-7.54                                                | 3                                                                            | <i>m</i>     | -                 |        |
| <p><b><sup>13</sup>C NMR</b> (100.6 MHz, CDCl<sub>3</sub>) δ: 163.01 (d, <sup>1</sup>J<sub>C-F</sub> = 247.4 Hz), 130.09 (d, <sup>4</sup>J<sub>C-F</sub> = 7.3 Hz), 127.47 (d, <sup>3</sup>J<sub>C-F</sub> = 2.9 Hz), 118.35 (d, <sup>2</sup>J<sub>C-F</sub> = 18.9 Hz), 117.04 (d, <sup>2</sup>J<sub>C-F</sub> = 21.1 Hz). The signal for the carbon atom attached to boron atom was not detected because of the quadrupolar relaxation of the boron atom.</p>                                                                                                                                                                                                                                                                                                                          |                                                          |                                                                              |              |                   |        |
| <p><b><sup>11</sup>B NMR</b> (128 MHz, CDCl<sub>3</sub>) δ: 33.19</p>                                                                                                                                                                                                                                                                                                                                                                                                                                                                                                                                                                                                                                                                                                                    |                                                          |                                                                              |              |                   |        |
| <p><b><sup>19</sup>F NMR</b> (376.4 MHz, CDCl<sub>3</sub>) δ: -113.38</p>                                                                                                                                                                                                                                                                                                                                                                                                                                                                                                                                                                                                                                                                                                                |                                                          |                                                                              |              |                   |        |

| Chem. Name                                                                                                                                                                                                                                                                                                                                                                                                                                                                                                                                                                                                                                                                                                                                                                          | <b><i>B,B',B''</i>-tri(3-chlorophenyl)borazine (11I)</b> |                                                                               |              |                   |  |
|-------------------------------------------------------------------------------------------------------------------------------------------------------------------------------------------------------------------------------------------------------------------------------------------------------------------------------------------------------------------------------------------------------------------------------------------------------------------------------------------------------------------------------------------------------------------------------------------------------------------------------------------------------------------------------------------------------------------------------------------------------------------------------------|----------------------------------------------------------|-------------------------------------------------------------------------------|--------------|-------------------|--|
| <div style="text-align: center;"> 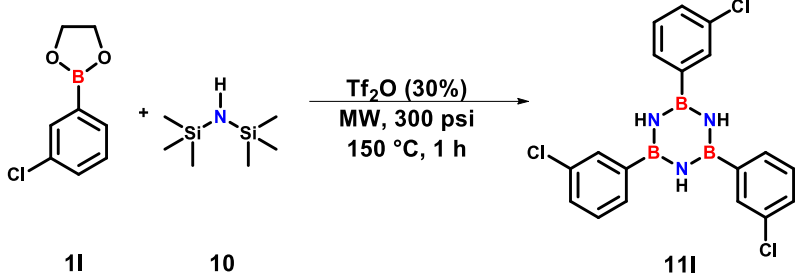 <p style="text-align: center;"> <b>1I</b>                      <b>10</b>                      <b>11I</b><br/> <b>M. W.: 412.124</b> </p> </div>                                                                                                                                                                                                                                                                                                                                                                                                                                                                                                                |                                                          |                                                                               |              |                   |  |
| <p><b>METHOD:</b> A microwave vessel, pre-dried in oven, was evacuated and flushed with argon. To the vessel, 1 mmol of 2-(3-chlorophenyl)-1,3,2-dioxaborolane (<b>1I</b>, 182 mg) was added, followed by another cycle of evacuation and argon filling. Next, 1 mL of HMDS (<b>10</b>) was introduced and 30 mol% of Tf<sub>2</sub>O (50 μL) was added dropwise. The vessel was placed in the microwave synthesizer and subjected to 150 °C for 1 hour at 150 W microwave power, with a pressure of 300 psi (20.7 bar), high mixing, and PowerMax enabled. After cooling to room temperature, 3 mL of heptane were added, and the mixture was stirred for 30 minutes. The product (<b>11I</b>) was then isolated by filtration as a white powder (117 mg, isolated yield 86%).</p> |                                                          |                                                                               |              |                   |  |
| <b>Mol Formula</b>                                                                                                                                                                                                                                                                                                                                                                                                                                                                                                                                                                                                                                                                                                                                                                  |                                                          | C <sub>18</sub> H <sub>15</sub> B <sub>3</sub> Cl <sub>3</sub> N <sub>3</sub> |              |                   |  |
| <b><sup>1</sup>H NMR</b><br><br><b>400 MHz</b><br><br><b>CDCl<sub>3</sub></b>                                                                                                                                                                                                                                                                                                                                                                                                                                                                                                                                                                                                                                                                                                       | <b>δ value</b>                                           | <b>No. H</b>                                                                  | <b>Mult.</b> | <b>j value/Hz</b> |  |
|                                                                                                                                                                                                                                                                                                                                                                                                                                                                                                                                                                                                                                                                                                                                                                                     | 5.83                                                     | 3                                                                             | <i>s</i>     | -                 |  |
|                                                                                                                                                                                                                                                                                                                                                                                                                                                                                                                                                                                                                                                                                                                                                                                     | 6-39-7.48                                                | 6                                                                             | <i>m</i>     | -                 |  |
|                                                                                                                                                                                                                                                                                                                                                                                                                                                                                                                                                                                                                                                                                                                                                                                     | 7.63                                                     | 3                                                                             | <i>d</i>     | 7.09              |  |
|                                                                                                                                                                                                                                                                                                                                                                                                                                                                                                                                                                                                                                                                                                                                                                                     | 7.71                                                     | 3                                                                             | <i>s</i>     | -                 |  |
| <p><b><sup>13</sup>C NMR</b> (100.6 MHz, CDCl<sub>3</sub>) δ: 134.65, 131.91, 130.20, 129.93, 129.75. The signal for the carbon atom attached to boron atom was not detected because of the quadrupolar relaxation of the boron atom.</p>                                                                                                                                                                                                                                                                                                                                                                                                                                                                                                                                           |                                                          |                                                                               |              |                   |  |
| <p><b><sup>11</sup>B NMR</b> (128 MHz, CDCl<sub>3</sub>) δ: 32.91</p>                                                                                                                                                                                                                                                                                                                                                                                                                                                                                                                                                                                                                                                                                                               |                                                          |                                                                               |              |                   |  |

| Chem. Name                                                                                                                                                                                                                                                                                                                                                                                                                                                                                                                                                                                                                                                                                                                                                                          | <b><i>B,B',B''</i>-tri(3-bromophenyl)borazine (11m)</b> |                                                                               |              |                   |        |
|-------------------------------------------------------------------------------------------------------------------------------------------------------------------------------------------------------------------------------------------------------------------------------------------------------------------------------------------------------------------------------------------------------------------------------------------------------------------------------------------------------------------------------------------------------------------------------------------------------------------------------------------------------------------------------------------------------------------------------------------------------------------------------------|---------------------------------------------------------|-------------------------------------------------------------------------------|--------------|-------------------|--------|
| <div style="text-align: center;"> 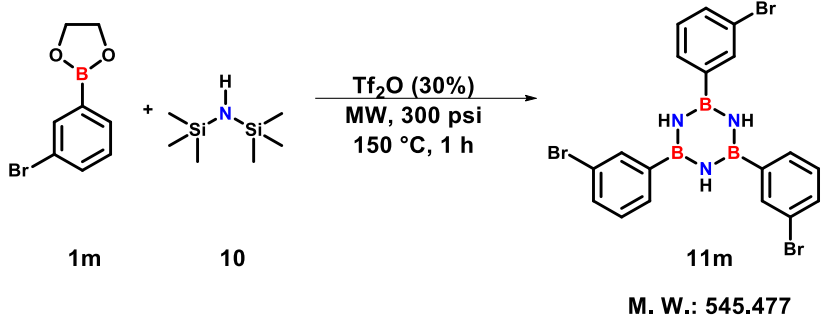 <p><b>1m</b>                      <b>10</b>                      <b>11m</b></p> <p><b>M. W.: 545.477</b></p> </div>                                                                                                                                                                                                                                                                                                                                                                                                                                                                                                                                            |                                                         |                                                                               |              |                   |        |
| <p><b>METHOD:</b> A microwave vessel, pre-dried in oven, was evacuated and flushed with argon. To the vessel, 1 mmol of 2-(3-bromophenyl)-1,3,2-dioxaborolane (<b>1m</b>, 227 mg) was added, followed by another cycle of evacuation and argon filling. Next, 1 mL of HMDS (<b>10</b>) was introduced and 30 mol% of Tf<sub>2</sub>O (50 μL) was added dropwise. The vessel was placed in the microwave synthesizer and subjected to 150 °C for 1 hour at 150 W microwave power, with a pressure of 300 psi (20.7 bar), high mixing, and PowerMax enabled. After cooling to room temperature, 3 mL of heptane were added, and the mixture was stirred for 30 minutes. The product (<b>11m</b>) was then isolated by filtration as an white powder (128 mg, isolated yield 71%).</p> |                                                         |                                                                               |              |                   |        |
| <b>Mol Formula</b>                                                                                                                                                                                                                                                                                                                                                                                                                                                                                                                                                                                                                                                                                                                                                                  |                                                         | C <sub>18</sub> H <sub>15</sub> B <sub>3</sub> Br <sub>3</sub> N <sub>3</sub> |              | <b>m.p.</b>       | 175 °C |
| <b><sup>1</sup>H NMR</b><br><br>400<br>MHz<br>CDCl <sub>3</sub>                                                                                                                                                                                                                                                                                                                                                                                                                                                                                                                                                                                                                                                                                                                     | <b>δ value</b>                                          | <b>No. H</b>                                                                  | <b>Mult.</b> | <b>j value/Hz</b> |        |
|                                                                                                                                                                                                                                                                                                                                                                                                                                                                                                                                                                                                                                                                                                                                                                                     | 5.81                                                    | 3                                                                             | <i>s</i>     | -                 |        |
|                                                                                                                                                                                                                                                                                                                                                                                                                                                                                                                                                                                                                                                                                                                                                                                     | 7.36                                                    | 3                                                                             | <i>d</i>     | 7.6               |        |
|                                                                                                                                                                                                                                                                                                                                                                                                                                                                                                                                                                                                                                                                                                                                                                                     | 7.71-7.58                                               | 6                                                                             | <i>m</i>     | -                 |        |
| 7.87                                                                                                                                                                                                                                                                                                                                                                                                                                                                                                                                                                                                                                                                                                                                                                                | 3                                                       | <i>m</i>                                                                      | -            |                   |        |
| <p><b><sup>13</sup>C NMR</b> (100.6 MHz, CDCl<sub>3</sub>) δ:134.84, 133.13, 130.39, 130.06, 123.15. The signal for the carbon atom attached to boron atom was not detected because of the quadrupolar relaxation of the boron atom.</p>                                                                                                                                                                                                                                                                                                                                                                                                                                                                                                                                            |                                                         |                                                                               |              |                   |        |
| <p><b><sup>11</sup>B NMR</b> (128 MHz, CDCl<sub>3</sub>) δ:33.03</p>                                                                                                                                                                                                                                                                                                                                                                                                                                                                                                                                                                                                                                                                                                                |                                                         |                                                                               |              |                   |        |

| Chem. Name                                                                                                                                                                                                                                                                                                                                                                                                                                                                                                                                                                                                                                                                                                                                                                           | <i>B,B',B''</i> -tri(3-methoxyphenyl)borazine ( <b>11n</b> ) |                                                                              |              |                   |        |
|--------------------------------------------------------------------------------------------------------------------------------------------------------------------------------------------------------------------------------------------------------------------------------------------------------------------------------------------------------------------------------------------------------------------------------------------------------------------------------------------------------------------------------------------------------------------------------------------------------------------------------------------------------------------------------------------------------------------------------------------------------------------------------------|--------------------------------------------------------------|------------------------------------------------------------------------------|--------------|-------------------|--------|
| <div style="text-align: center;"> 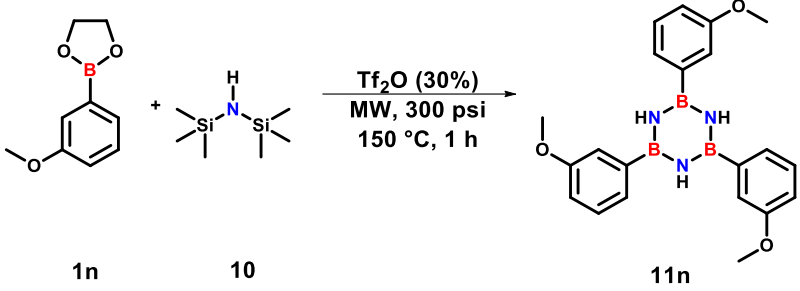 <p style="text-align: center;"><b>1n</b>                      <b>10</b>                                              <b>11n</b></p> <p style="text-align: right;"><b>M. W.: 398.867</b></p> </div>                                                                                                                                                                                                                                                                                                                                                                                                                                                              |                                                              |                                                                              |              |                   |        |
| <p><b>METHOD:</b> A microwave vessel, pre-dried in oven, was evacuated and flushed with argon. To the vessel, 1 mmol of 2-(3-methoxyphenyl)-1,3,2-dioxaborolane (<b>1n</b>, 178 mg) was added, followed by another cycle of evacuation and argon filling. Next, 1 mL of HMDS (<b>10</b>) was introduced and 30 mol% of Tf<sub>2</sub>O (50 μL) was added dropwise. The vessel was placed in the microwave synthesizer and subjected to 150 °C for 1 hour at 150 W microwave power, with a pressure of 300 psi (20.7 bar), high mixing, and PowerMax enabled. After cooling to room temperature, 3 mL of heptane were added, and the mixture was stirred for 30 minutes. The product (<b>11n</b>) was then isolated by filtration as a white powder (125 mg, isolated yield 95%).</p> |                                                              |                                                                              |              |                   |        |
| <b>Mol Formula</b>                                                                                                                                                                                                                                                                                                                                                                                                                                                                                                                                                                                                                                                                                                                                                                   |                                                              | C <sub>21</sub> H <sub>24</sub> B <sub>3</sub> N <sub>3</sub> O <sub>3</sub> |              | <b>m.p.</b>       | 144 °C |
| <b><sup>1</sup>H NMR</b><br><br>400<br>MHz<br>CDCl <sub>3</sub>                                                                                                                                                                                                                                                                                                                                                                                                                                                                                                                                                                                                                                                                                                                      | <b>δ value</b>                                               | <b>No. H</b>                                                                 | <b>Mult.</b> | <b>j value/Hz</b> |        |
|                                                                                                                                                                                                                                                                                                                                                                                                                                                                                                                                                                                                                                                                                                                                                                                      | 3.88                                                         | 9                                                                            | s            | -                 |        |
|                                                                                                                                                                                                                                                                                                                                                                                                                                                                                                                                                                                                                                                                                                                                                                                      | 5.85                                                         | 3                                                                            | s            | -                 |        |
|                                                                                                                                                                                                                                                                                                                                                                                                                                                                                                                                                                                                                                                                                                                                                                                      | 7.00-7.03                                                    | 3                                                                            | m            | -                 |        |
|                                                                                                                                                                                                                                                                                                                                                                                                                                                                                                                                                                                                                                                                                                                                                                                      | 7.28-7.29                                                    | 3                                                                            | m            | -                 |        |
| 7.34-7.42                                                                                                                                                                                                                                                                                                                                                                                                                                                                                                                                                                                                                                                                                                                                                                            | 6                                                            | m                                                                            | -            |                   |        |
| <p><b><sup>13</sup>C NMR</b> (100.6 MHz, CDCl<sub>3</sub>) δ: 159.46, 129.46, 124.26, 117.52, 115.15, 55.29. The signal for the carbon atom attached to boron atom was not detected because of the quadrupolar relaxation of the boron atom.</p>                                                                                                                                                                                                                                                                                                                                                                                                                                                                                                                                     |                                                              |                                                                              |              |                   |        |
| <p><b><sup>11</sup>B NMR</b> (128 MHz, CDCl<sub>3</sub>) δ: 33.57</p>                                                                                                                                                                                                                                                                                                                                                                                                                                                                                                                                                                                                                                                                                                                |                                                              |                                                                              |              |                   |        |

| Chem. Name                                                                                                                                                                                                                                                                                                                                                                                                                                                                                                                                                                                                                                                                                                                                                                            |                | <i>B,B',B''</i> -tri( <i>m</i> -tolyl)borazine ( <b>11o</b> ) |              |                   |        |
|---------------------------------------------------------------------------------------------------------------------------------------------------------------------------------------------------------------------------------------------------------------------------------------------------------------------------------------------------------------------------------------------------------------------------------------------------------------------------------------------------------------------------------------------------------------------------------------------------------------------------------------------------------------------------------------------------------------------------------------------------------------------------------------|----------------|---------------------------------------------------------------|--------------|-------------------|--------|
| <p style="text-align: center;"><b>1o</b>                      <b>10</b>                      <b>11o</b></p> <p style="text-align: center;"><b>M. W.: 350.868</b></p>                                                                                                                                                                                                                                                                                                                                                                                                                                                                                                                                                                                                                  |                |                                                               |              |                   |        |
| <b>METHOD:</b> A microwave vessel, pre-dried in oven, was evacuated and flushed with argon. To the vessel, 1 mmol of 2-( <i>m</i> -tolyl)-1,3,2-dioxaborolane ( <b>1o</b> , 162 mg) was added, followed by another cycle of evacuation and argon filling. Next, 1 mL of HMDS ( <b>10</b> ) was introduced and 30 mol% of Tf <sub>2</sub> O (50 μL) was added dropwise. The vessel was placed in the microwave synthesizer and subjected to 150 °C for 1 hour at 150 W microwave power, with a pressure of 300 psi (20.7 bar), high mixing, and PowerMax enabled. After cooling to room temperature, 3 mL of heptane were added, and the mixture was stirred for 30 minutes. The product ( <b>11o</b> ) was then isolated by filtration as a white powder (70 mg, isolated yield 60%). |                |                                                               |              |                   |        |
| <b>Mol Formula</b>                                                                                                                                                                                                                                                                                                                                                                                                                                                                                                                                                                                                                                                                                                                                                                    |                | C <sub>21</sub> H <sub>24</sub> B <sub>3</sub> N <sub>3</sub> |              | <b>m.p.</b>       | 140 °C |
| <b><sup>1</sup>H NMR</b><br>400 MHz<br>CDCl <sub>3</sub>                                                                                                                                                                                                                                                                                                                                                                                                                                                                                                                                                                                                                                                                                                                              | <b>δ value</b> | <b>No. H</b>                                                  | <b>Mult.</b> | <b>j value/Hz</b> |        |
|                                                                                                                                                                                                                                                                                                                                                                                                                                                                                                                                                                                                                                                                                                                                                                                       | 2.45           | 9                                                             | <i>s</i>     | -                 |        |
|                                                                                                                                                                                                                                                                                                                                                                                                                                                                                                                                                                                                                                                                                                                                                                                       | 5.87           | 3                                                             | <i>s</i>     | -                 |        |
|                                                                                                                                                                                                                                                                                                                                                                                                                                                                                                                                                                                                                                                                                                                                                                                       | 7.29-7.31      | 3                                                             | <i>m</i>     | -                 |        |
|                                                                                                                                                                                                                                                                                                                                                                                                                                                                                                                                                                                                                                                                                                                                                                                       | 7.35-7.39      | 3                                                             | <i>m</i>     | -                 |        |
|                                                                                                                                                                                                                                                                                                                                                                                                                                                                                                                                                                                                                                                                                                                                                                                       | 7.59           | 6                                                             | <i>s</i>     | -                 |        |
| <b><sup>13</sup>C NMR</b> (100.6 MHz, CDCl <sub>3</sub> ) δ: 137.55, 132.70, 130.73, 129.00, 128.14, 21.59. The signal for the carbon atom attached to boron atom was not detected because of the quadrupolar relaxation of the boron atom.                                                                                                                                                                                                                                                                                                                                                                                                                                                                                                                                           |                |                                                               |              |                   |        |
| <b><sup>11</sup>B NMR</b> (128 MHz, CDCl <sub>3</sub> ) δ: 33.46                                                                                                                                                                                                                                                                                                                                                                                                                                                                                                                                                                                                                                                                                                                      |                |                                                               |              |                   |        |

| Chem. Name                                                                                                                                                                                                                                                                                                                                                                                                                                                                                                                                                                                                                                                                                                                                                                                 | <i>B,B',B''</i> -tri(2,4-difluorophenyl)borazine ( <b>11p</b> )              |              |              |                   |
|--------------------------------------------------------------------------------------------------------------------------------------------------------------------------------------------------------------------------------------------------------------------------------------------------------------------------------------------------------------------------------------------------------------------------------------------------------------------------------------------------------------------------------------------------------------------------------------------------------------------------------------------------------------------------------------------------------------------------------------------------------------------------------------------|------------------------------------------------------------------------------|--------------|--------------|-------------------|
| <p style="text-align: center;">M. W.: 416.731</p>                                                                                                                                                                                                                                                                                                                                                                                                                                                                                                                                                                                                                                                                                                                                          |                                                                              |              |              |                   |
| <b>METHOD:</b> A microwave vessel, pre-dried in oven, was evacuated and flushed with argon. To the vessel, 1 mmol of 2-(2,4-difluorophenyl)-1,3,2-dioxaborolane ( <b>1p</b> , 184 mg) was added, followed by another cycle of evacuation and argon filling. Next, 1 mL of HMDMS ( <b>10</b> ) was introduced and 30 mol% of Tf <sub>2</sub> O (50 μL) were added dropwise. The vessel was placed in the microwave synthesizer and subjected to 150 °C for 1 hour at 150 W microwave power, with a pressure of 300 psi (20.7 bar), high mixing, and PowerMax enabled. After cooling to room temperature, 3 mL of heptane were added, and the mixture was stirred for 30 minutes. The product ( <b>11p</b> ) was then isolated by filtration as a white powder (132 mg, isolated yield 96%). |                                                                              |              |              |                   |
| <b>Mol Formula</b>                                                                                                                                                                                                                                                                                                                                                                                                                                                                                                                                                                                                                                                                                                                                                                         | C <sub>18</sub> H <sub>12</sub> B <sub>3</sub> F <sub>6</sub> N <sub>3</sub> |              | <b>m.p.</b>  | 210 °C            |
| <b><sup>1</sup>H NMR</b><br>400<br>MHz<br>CDCl <sub>3</sub>                                                                                                                                                                                                                                                                                                                                                                                                                                                                                                                                                                                                                                                                                                                                | <b>δ value</b>                                                               | <b>No. H</b> | <b>Mult.</b> | <b>j value/Hz</b> |
|                                                                                                                                                                                                                                                                                                                                                                                                                                                                                                                                                                                                                                                                                                                                                                                            | 6.28                                                                         | 3            | <i>s</i>     | -                 |
|                                                                                                                                                                                                                                                                                                                                                                                                                                                                                                                                                                                                                                                                                                                                                                                            | 6.84-6.89                                                                    | 3            | <i>m</i>     | -                 |
|                                                                                                                                                                                                                                                                                                                                                                                                                                                                                                                                                                                                                                                                                                                                                                                            | 6.96-7.01                                                                    | 3            | <i>m</i>     | -                 |
|                                                                                                                                                                                                                                                                                                                                                                                                                                                                                                                                                                                                                                                                                                                                                                                            | 7.62-7.68                                                                    | 3            | <i>m</i>     | -                 |
| <b><sup>11</sup>B NMR</b> (128 MHz, CDCl <sub>3</sub> ) δ: 31.69                                                                                                                                                                                                                                                                                                                                                                                                                                                                                                                                                                                                                                                                                                                           |                                                                              |              |              |                   |
| <b><sup>19</sup>F NMR</b> (376.4 MHz, CDCl <sub>3</sub> ) δ: -106.89, -103.05                                                                                                                                                                                                                                                                                                                                                                                                                                                                                                                                                                                                                                                                                                              |                                                                              |              |              |                   |

## 8. References

- (1) Ranjani, G.; Nagarajan, R. Insight into Copper Catalysis: In Situ Formed Nano Cu<sub>2</sub>O in Suzuki–Miyaura Cross-Coupling of Aryl/Indolyl Boronates. *Org. Lett.* **2017**, *19* (15), 3974–3977. <https://doi.org/10.1021/acs.orglett.7b01669>.
- (2) Ishiyama, T.; Murata, M.; Miyaura, N. Palladium(0)-Catalyzed Cross-Coupling Reaction of Alkoxydiboron with Haloarenes: A Direct Procedure for Arylboronic Esters. *J. Org. Chem.* **1995**, *60* (23), 7508–7510. <https://doi.org/10.1021/jo00128a024>.
- (3) Kaupp, G.; Naimi-Jamal, M. R.; Stepanenko, V. Waste-Free and Facile Solid-State Protection of Diamines, Anthranilic Acid, Diols, and Polyols with Phenylboronic Acid. *Chem. – Eur. J.* **2003**, *9* (17), 4156–4161. <https://doi.org/10.1002/chem.200304793>.
- (4) Liu, C.; Guo, Z.; Weng, J.; Lu, G.; Chan, A. S. C. Chiral 1,1'-binaphthylazepine-derived Amino Alcohol Catalyzed Asymmetric Aryl Transfer Reactions with Boroxine as Aryl Source. *Chirality* **2010**, *22* (1), 159–164. <https://doi.org/10.1002/chir.20721>.

## 9. Copies of NMR spectra

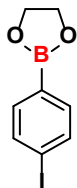

**1e, 80%**

7.75  
7.73  
7.53  
7.51  
7.26

4.38

1.55

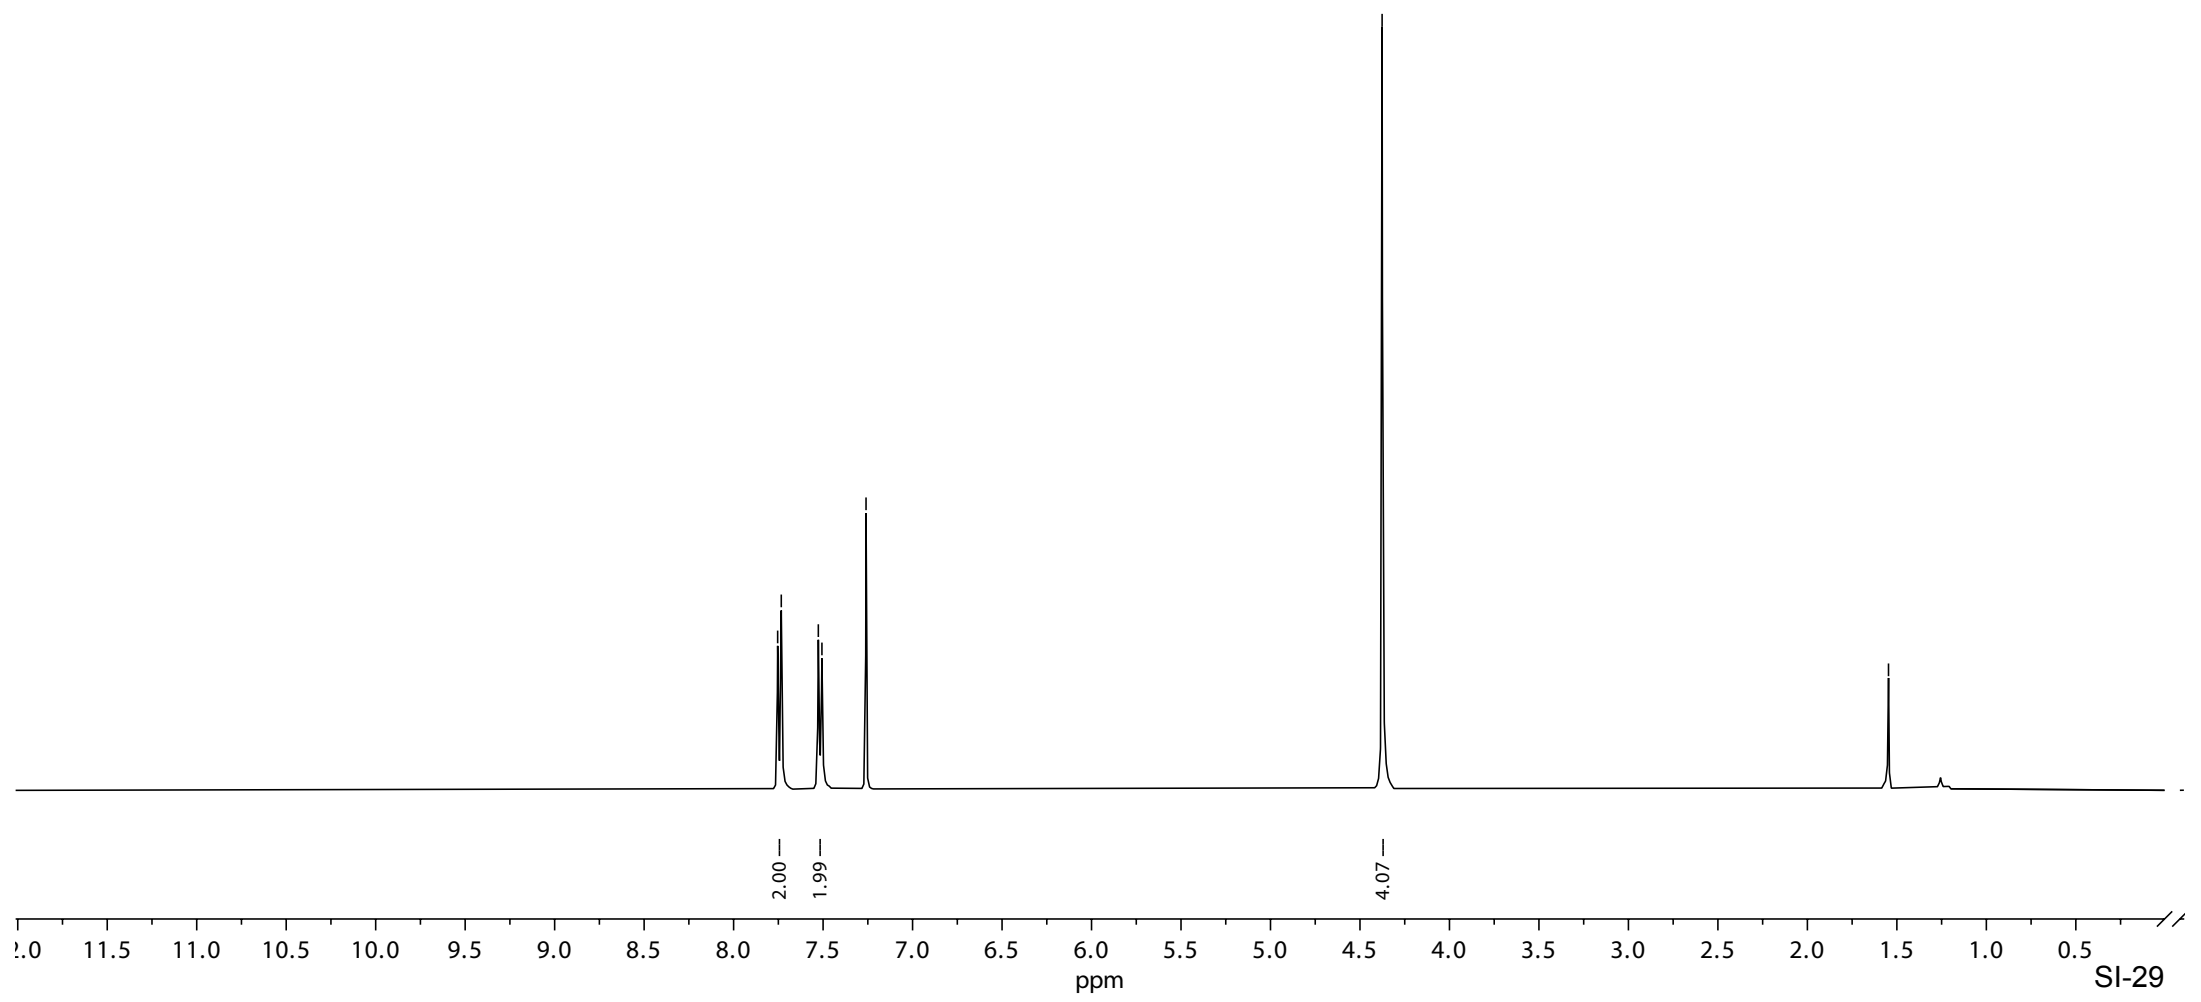

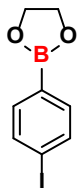

**1e, 80%**

—31.66

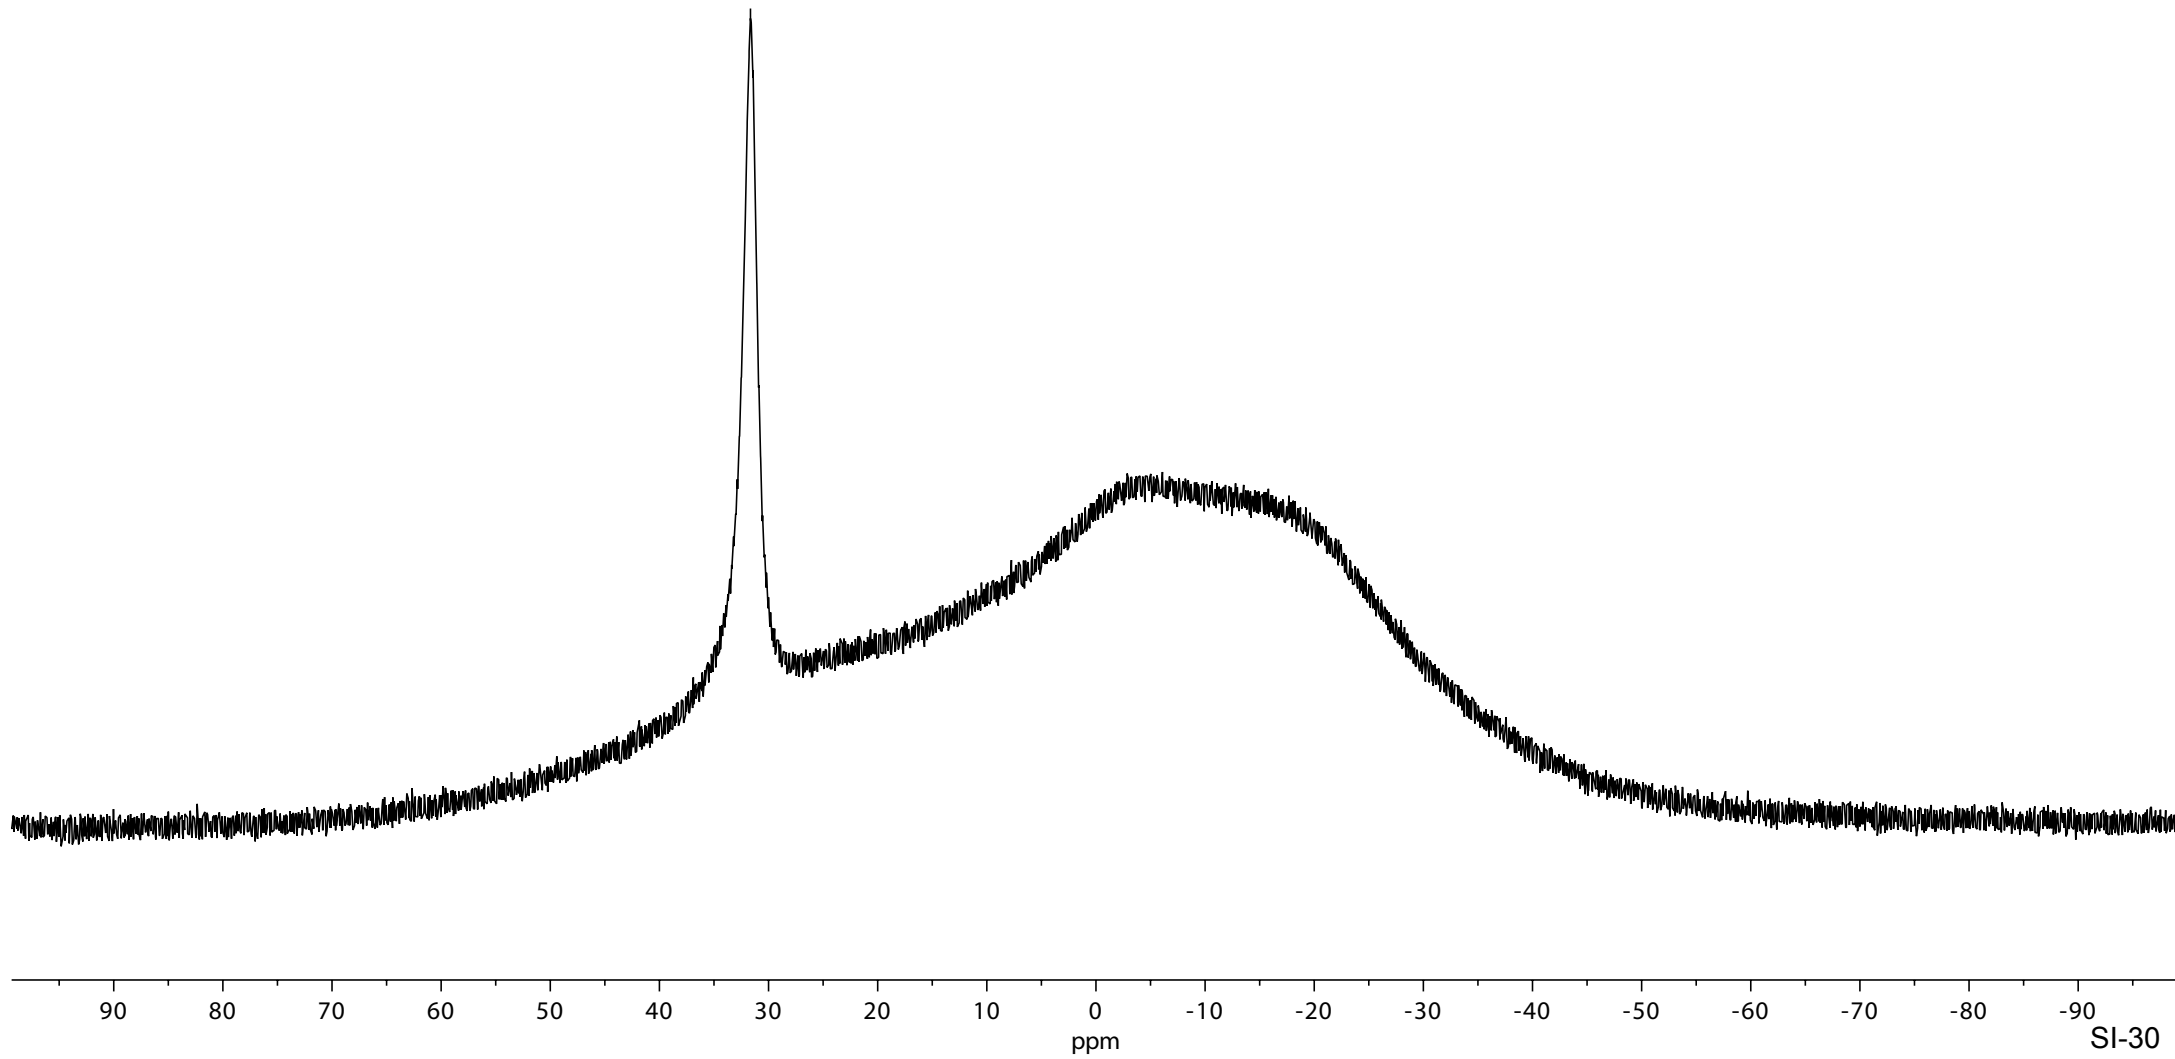

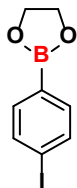

**1e, 80%**

137.11  
136.33

99.15

77.34  
77.02  
76.70

66.14

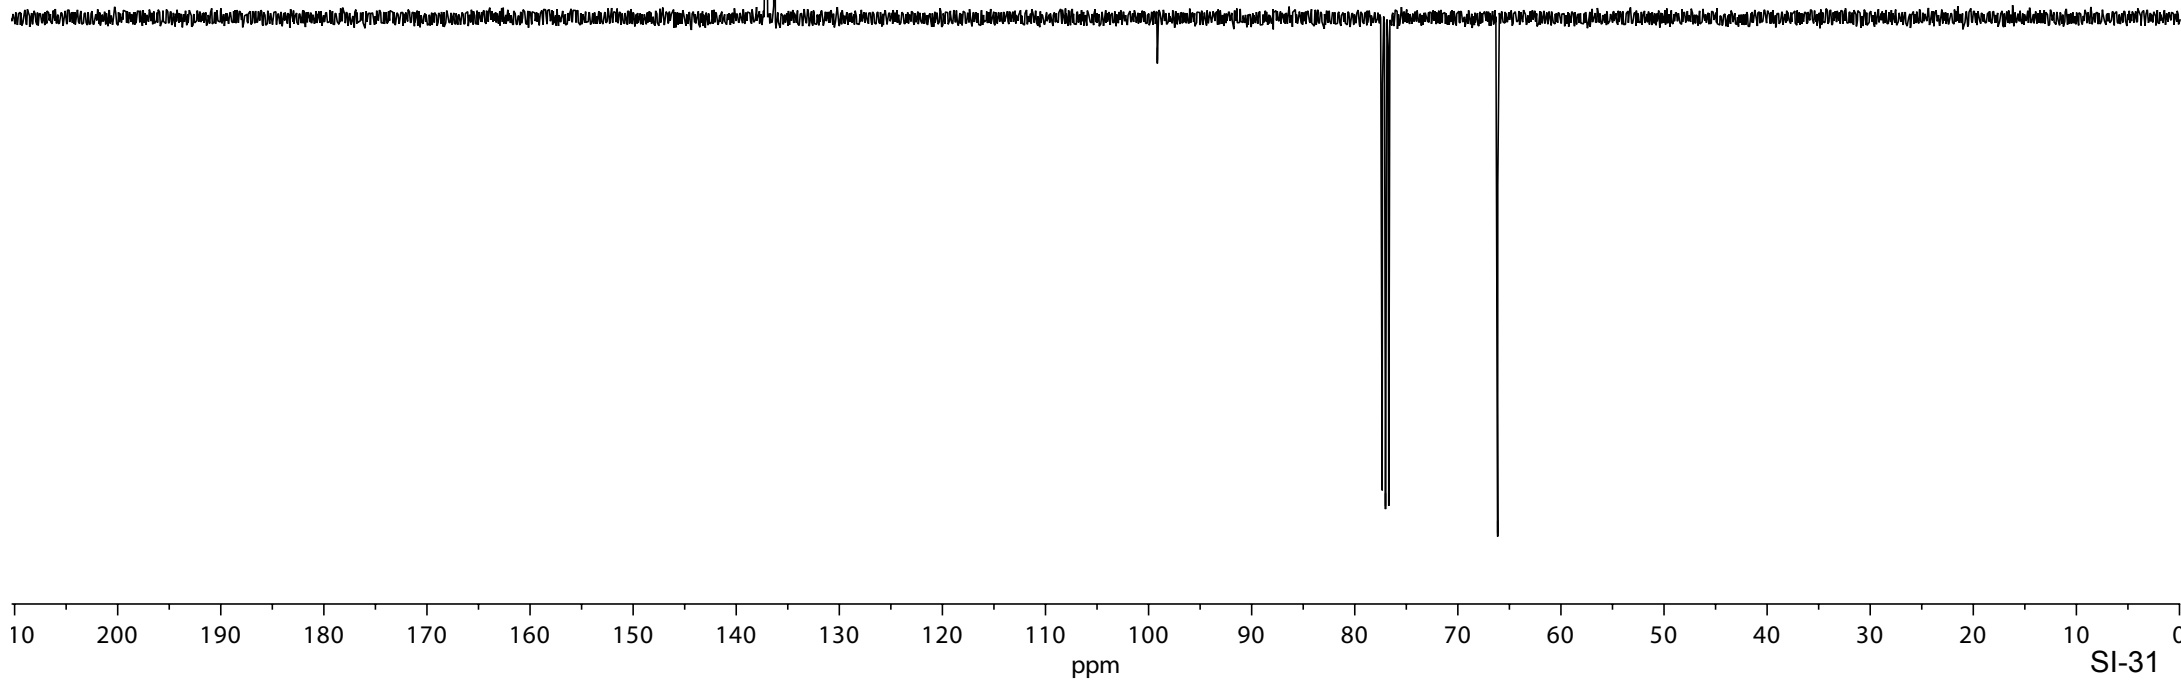

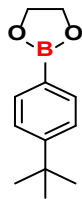

**1i, 82%**

7.77  
7.75  
7.43  
7.41  
7.26

4.37

1.55  
1.33

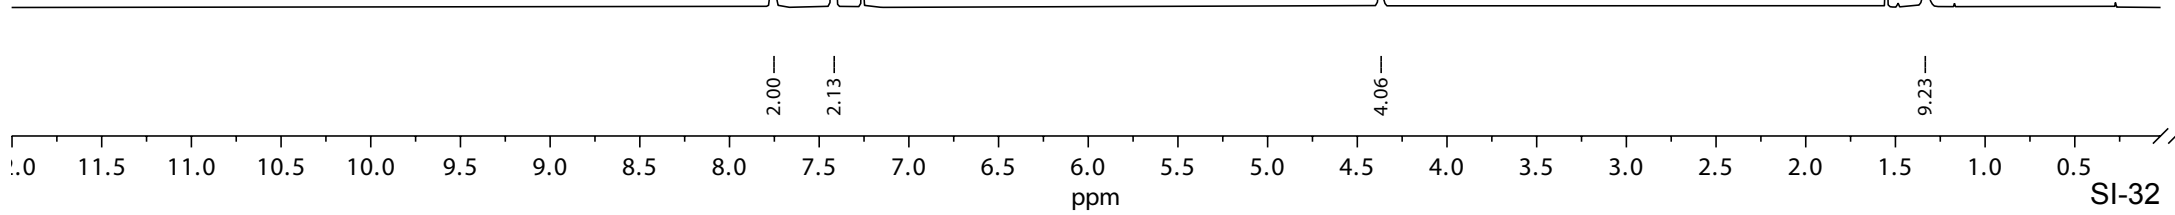

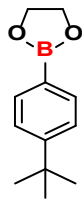

**1i, 82%**

—31.64

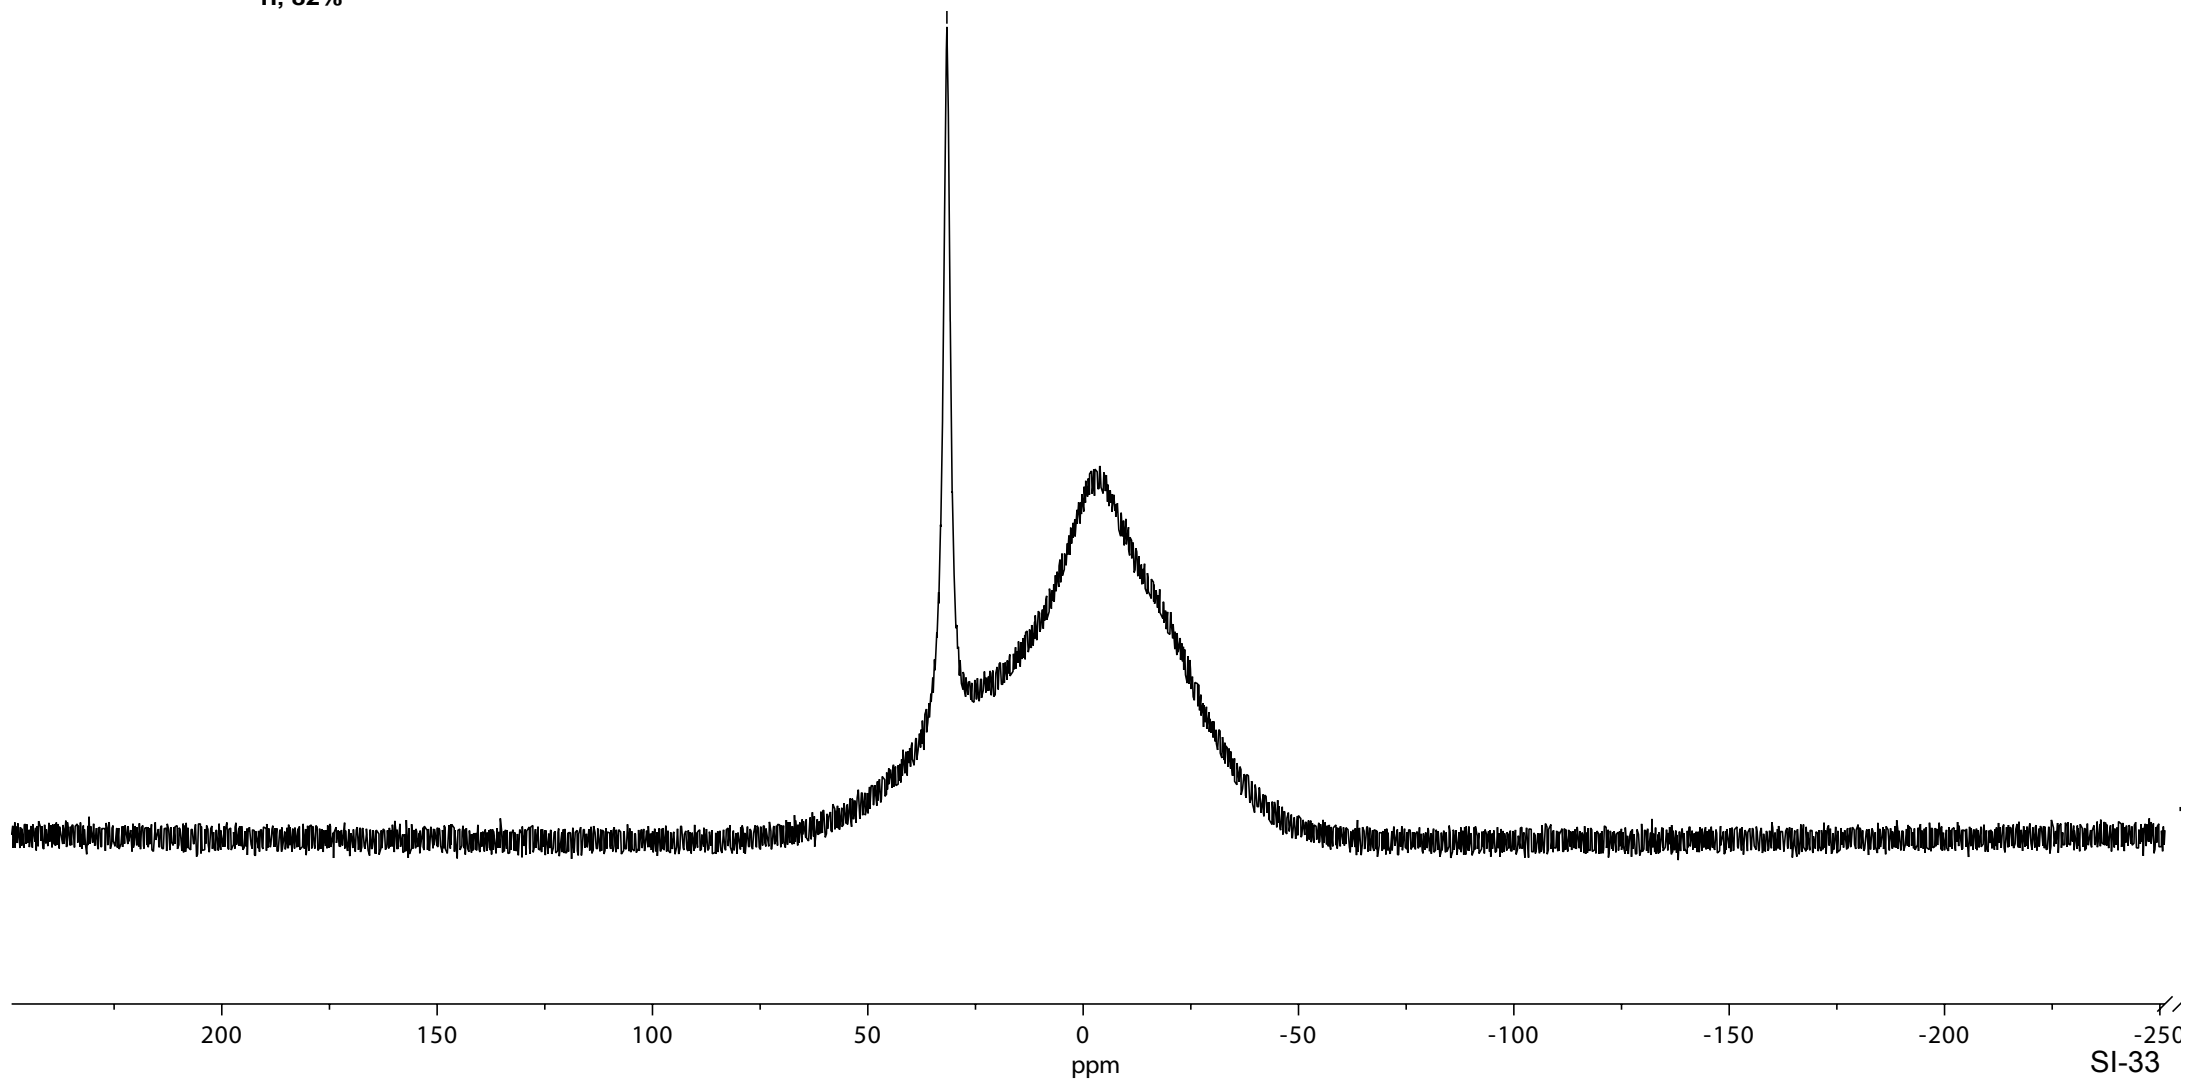

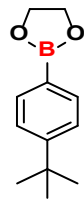

**1i, 82%**

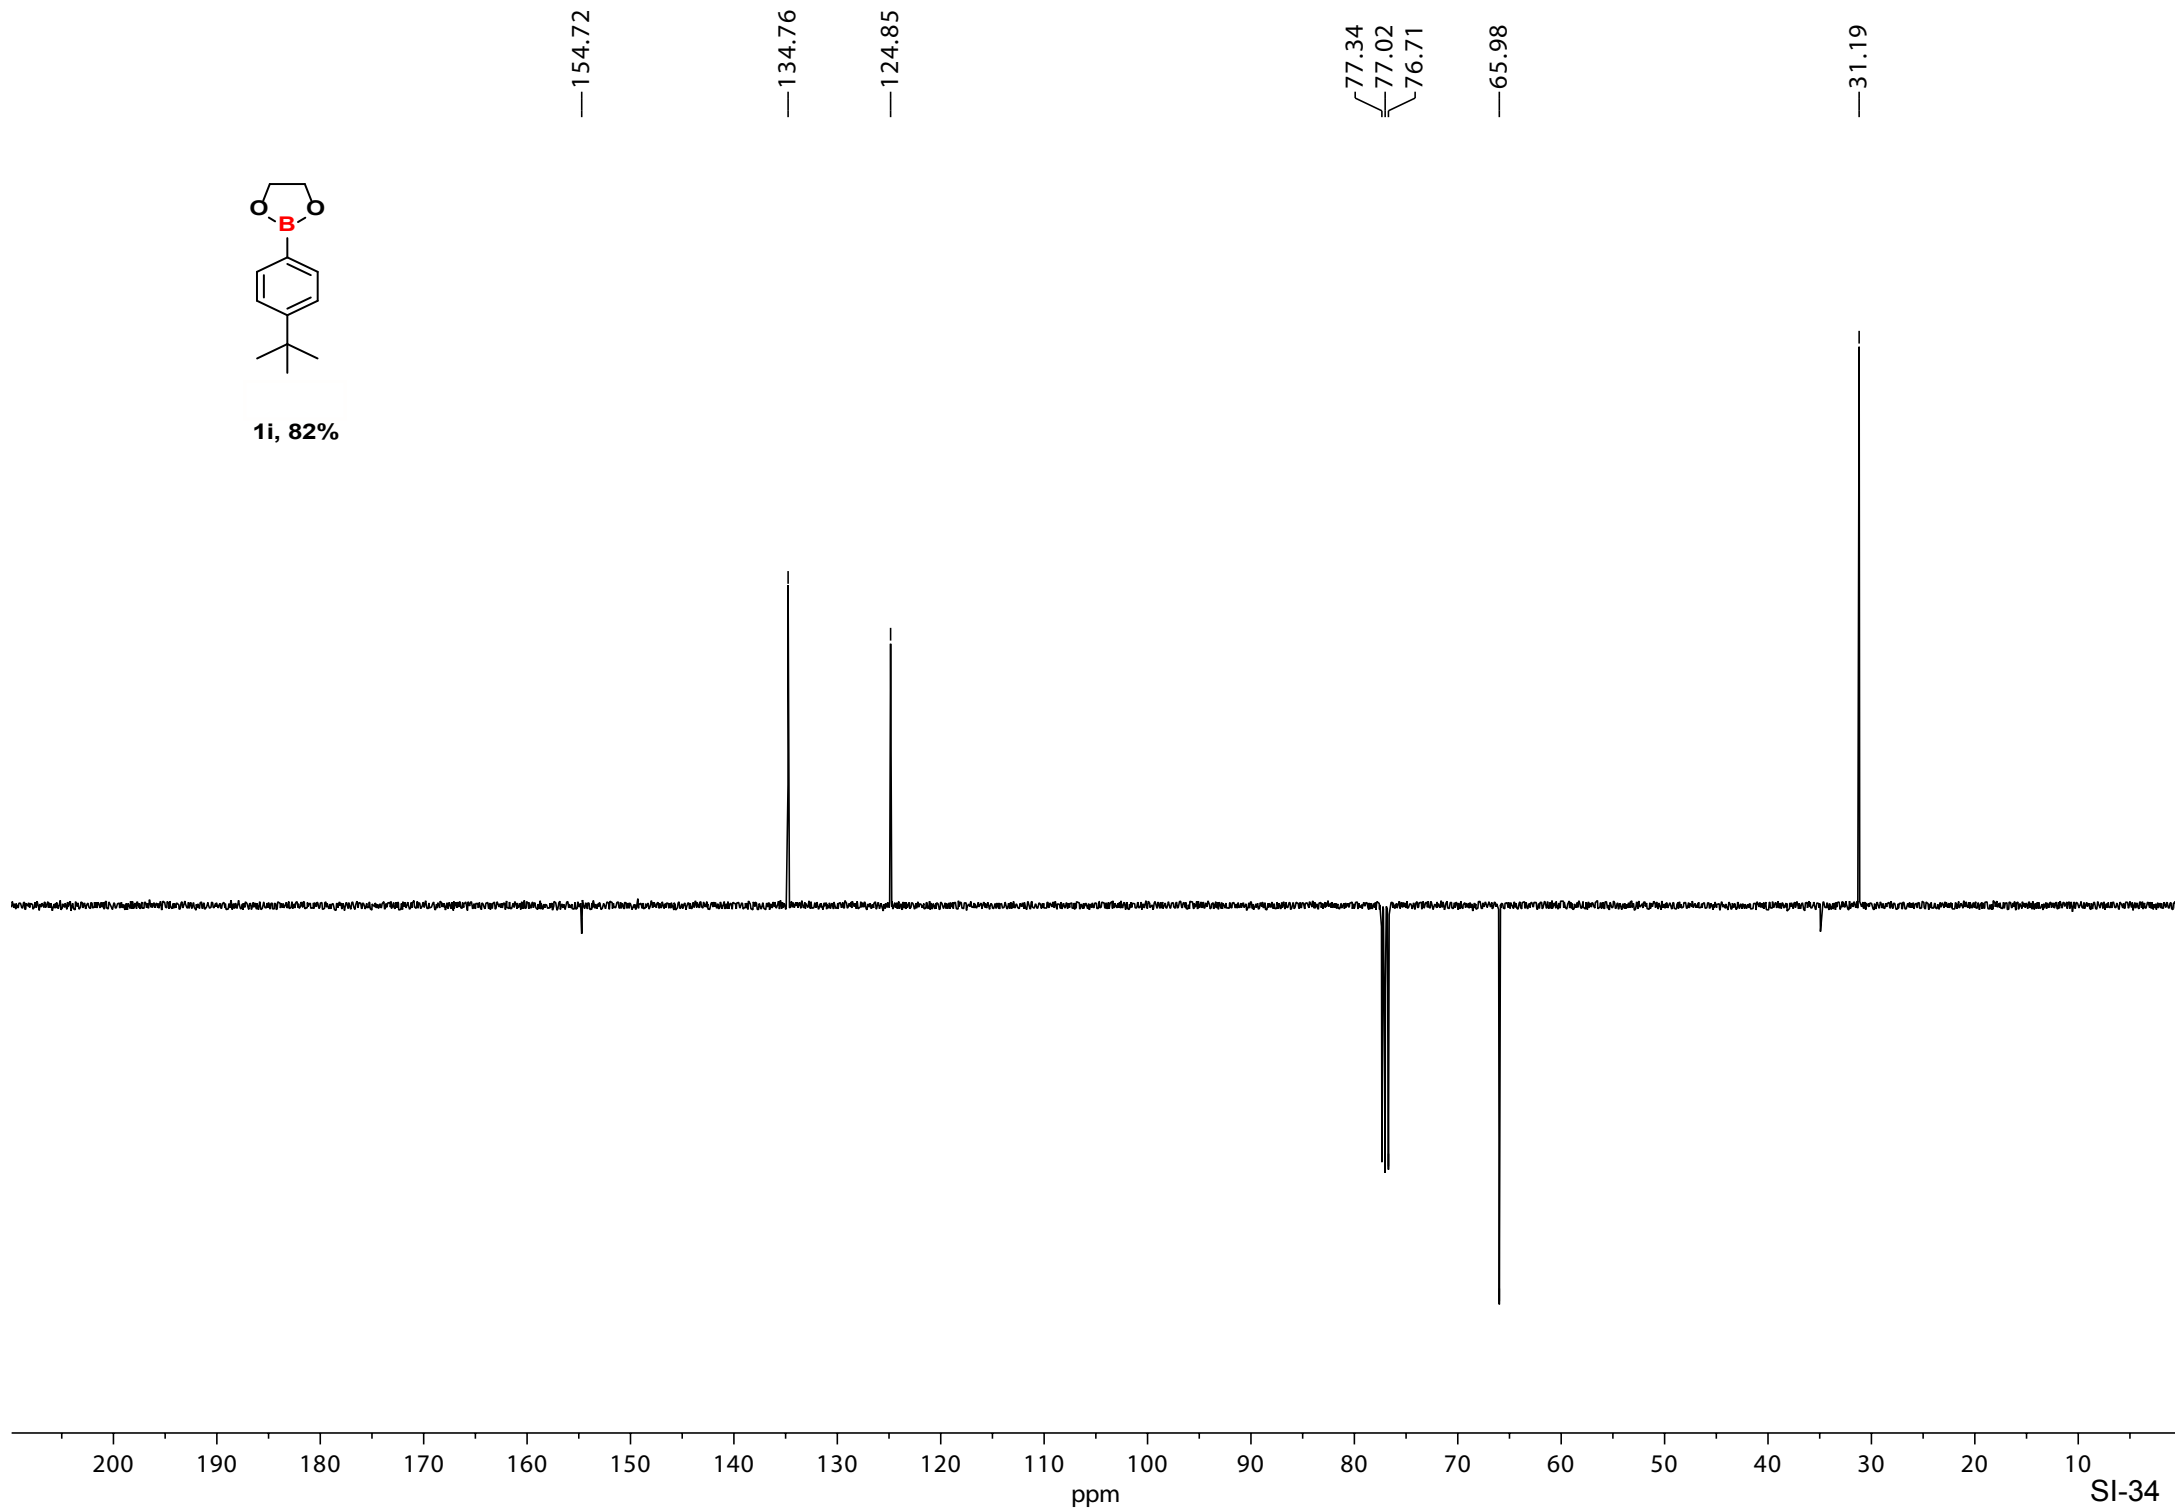

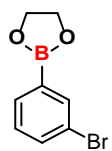

1m, 89%

7.89  
7.68  
7.66  
7.56  
7.54  
7.23  
7.21  
7.19

4.33

1.56

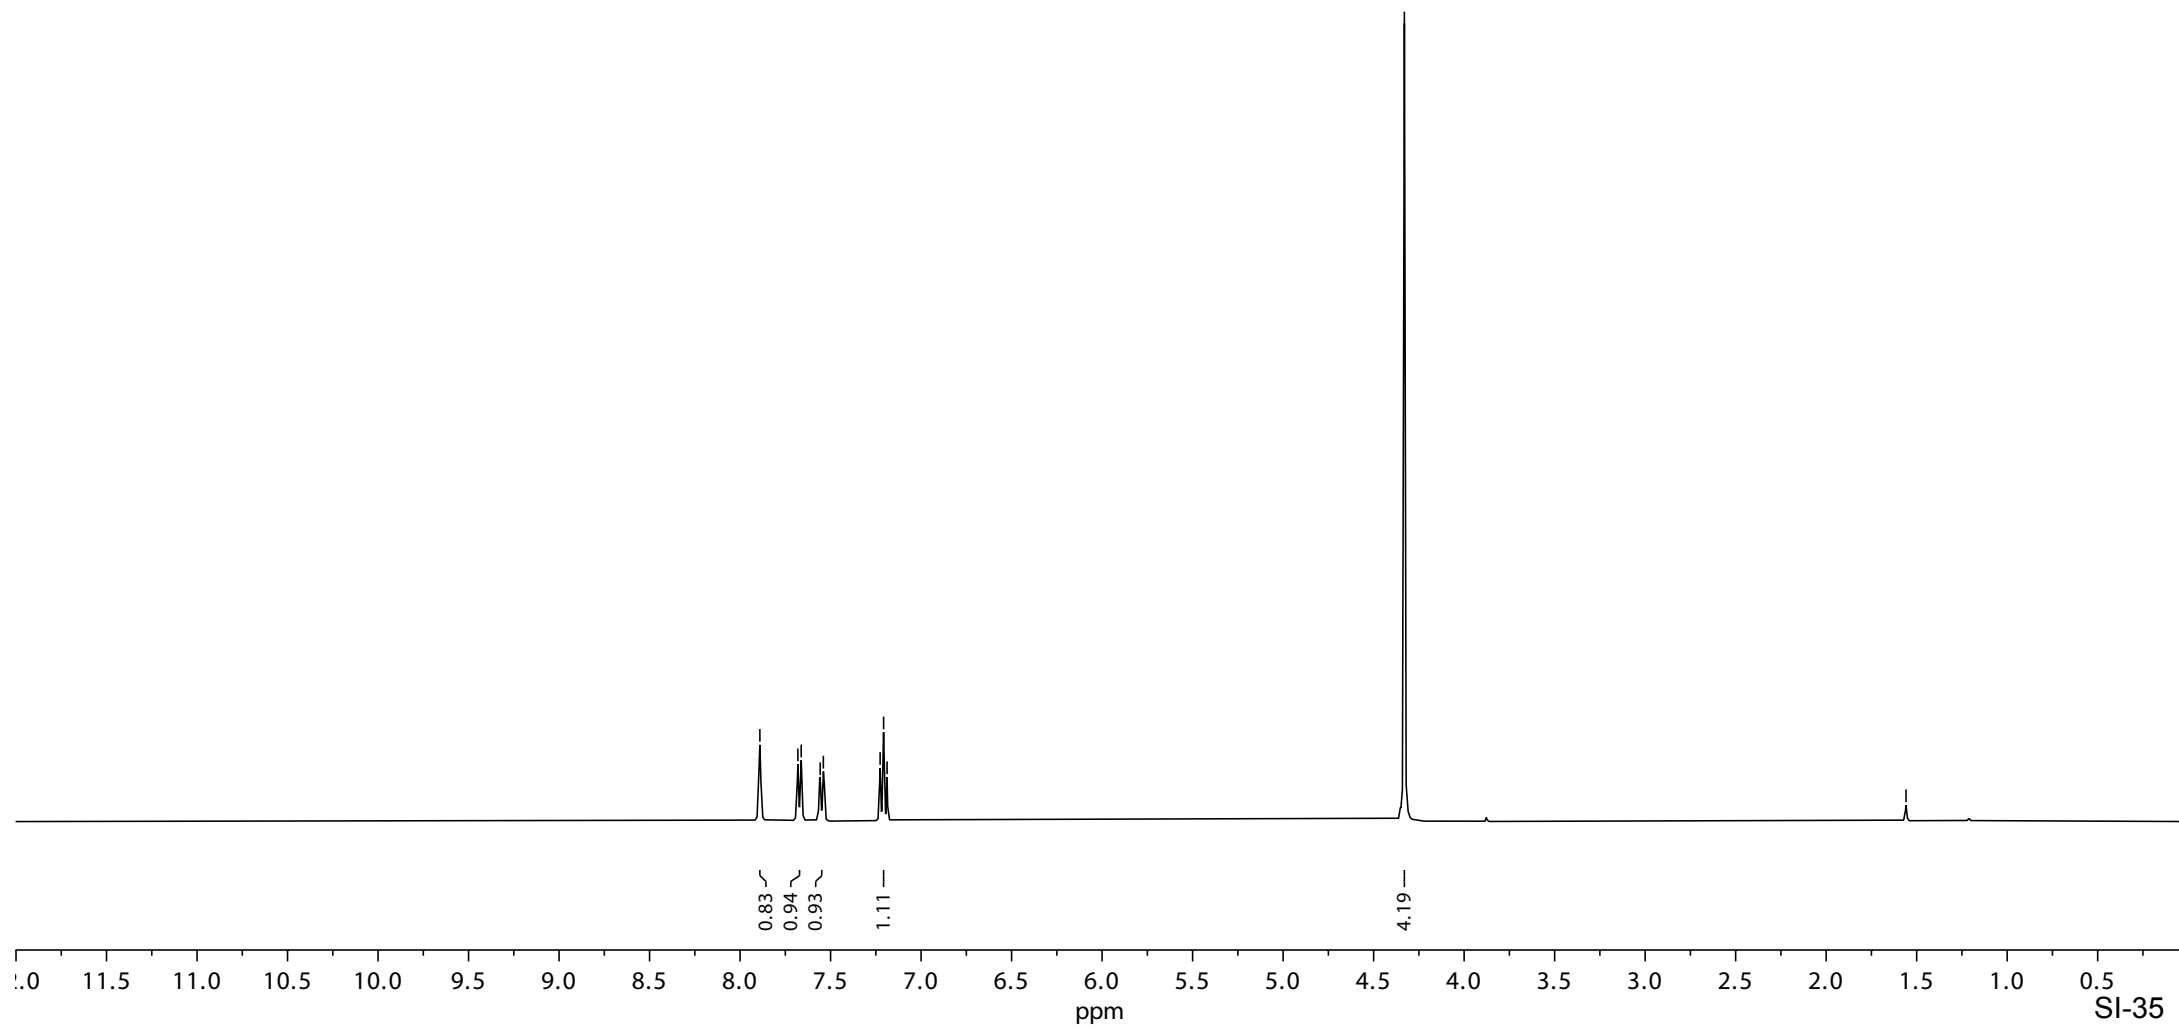

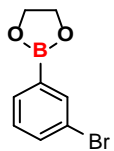

1m, 89%

—31.14

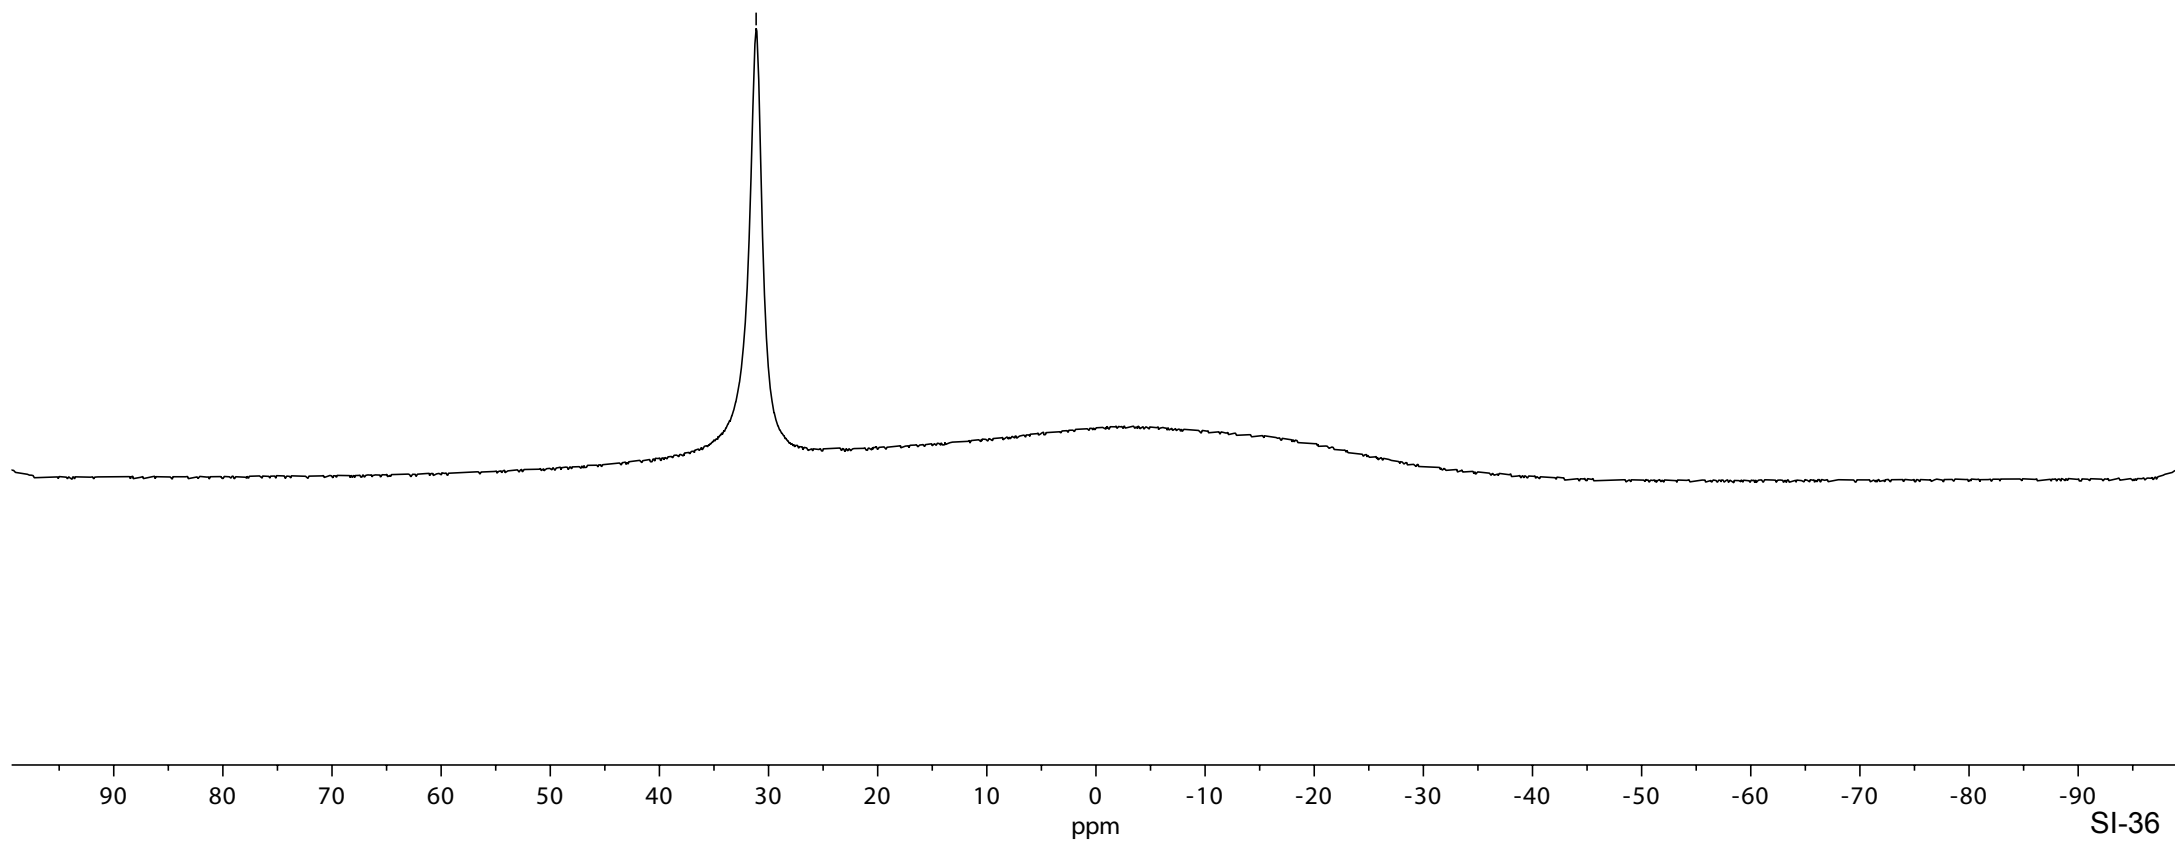

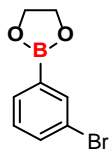

1m, 89%

137.62  
134.43  
133.19  
129.65  
122.50

77.36  
77.05  
76.73  
66.18

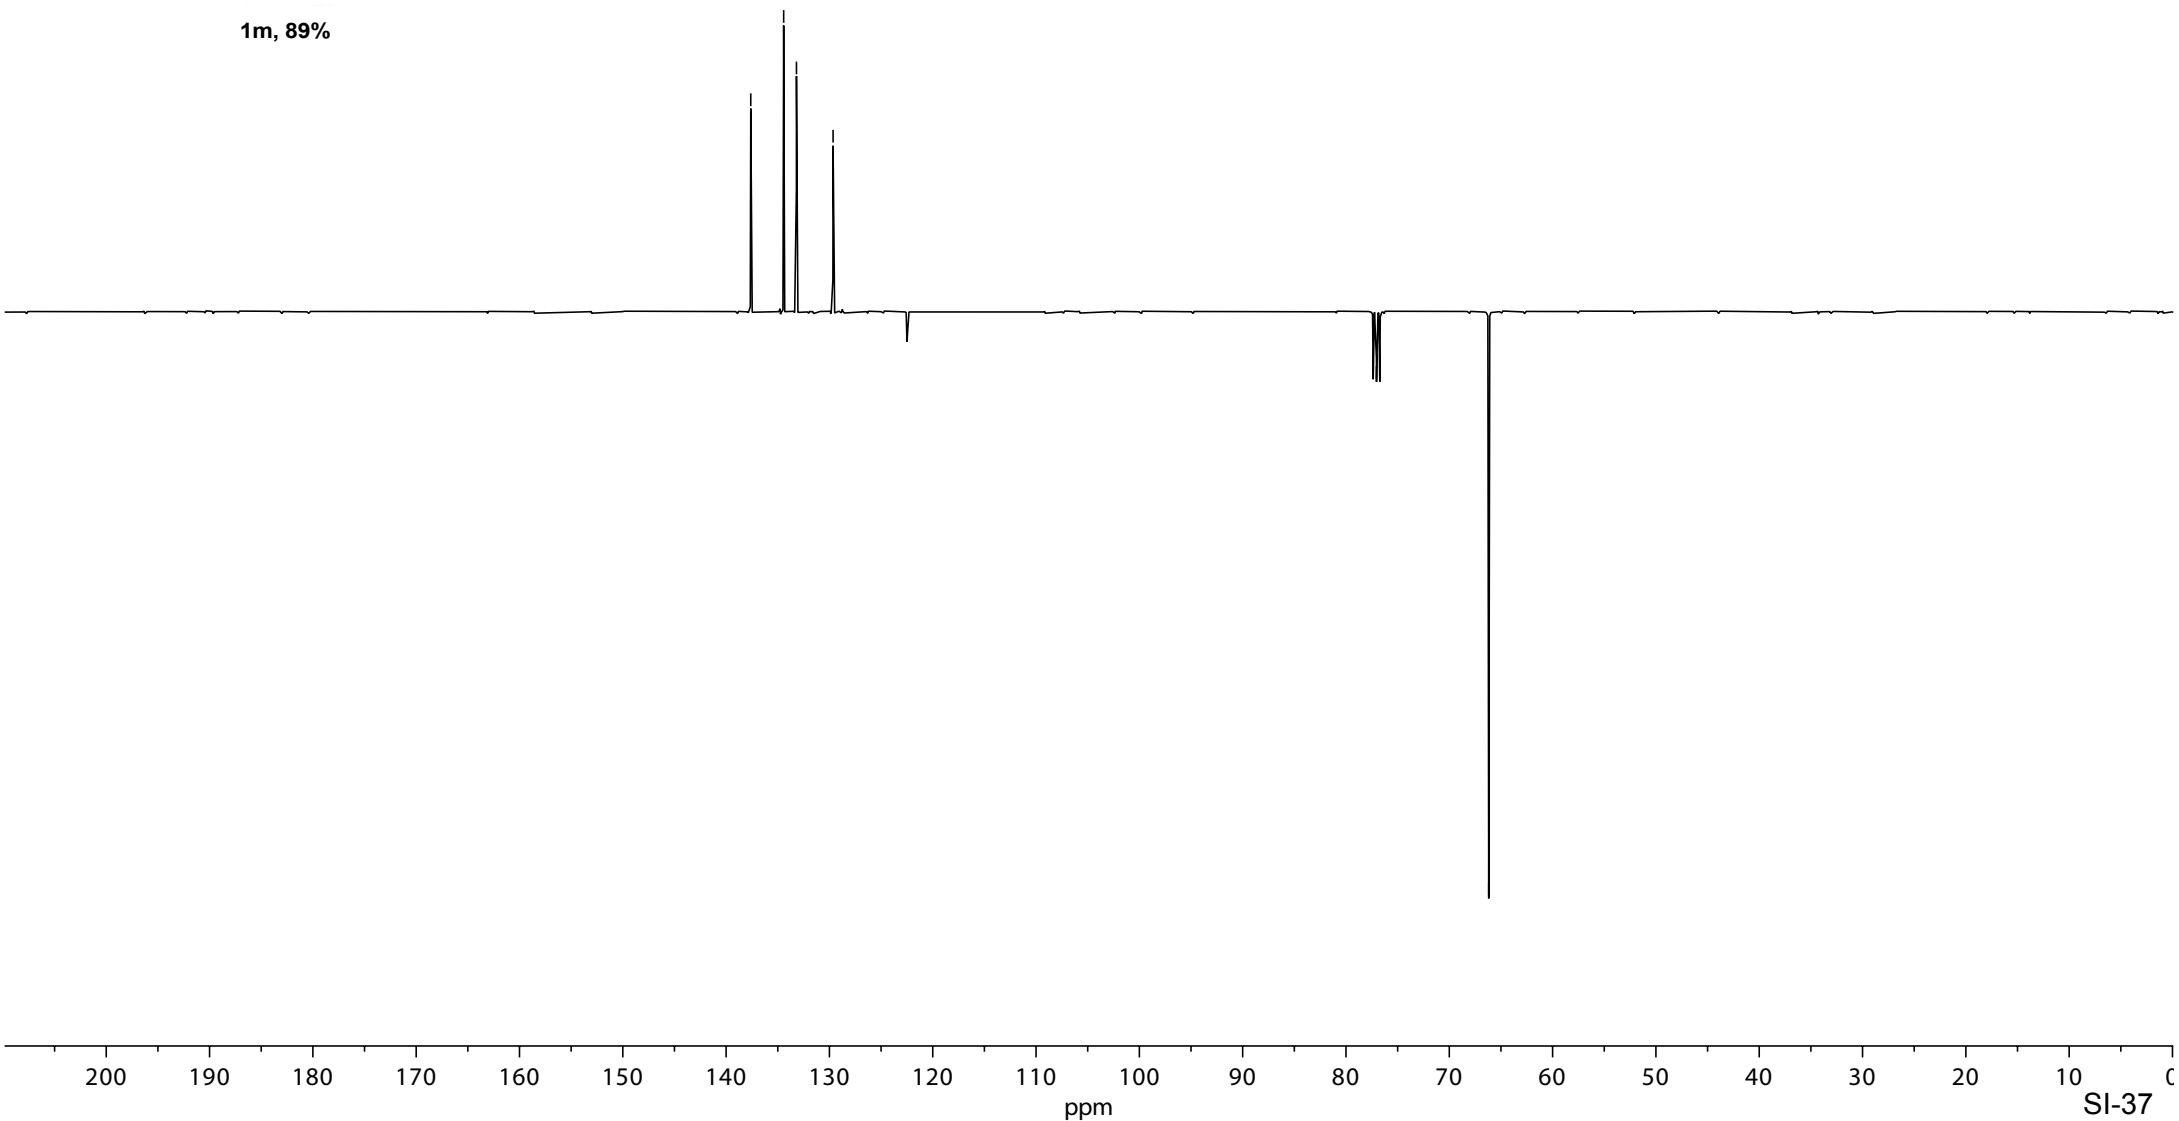

SI-37

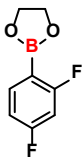

1p, 84%

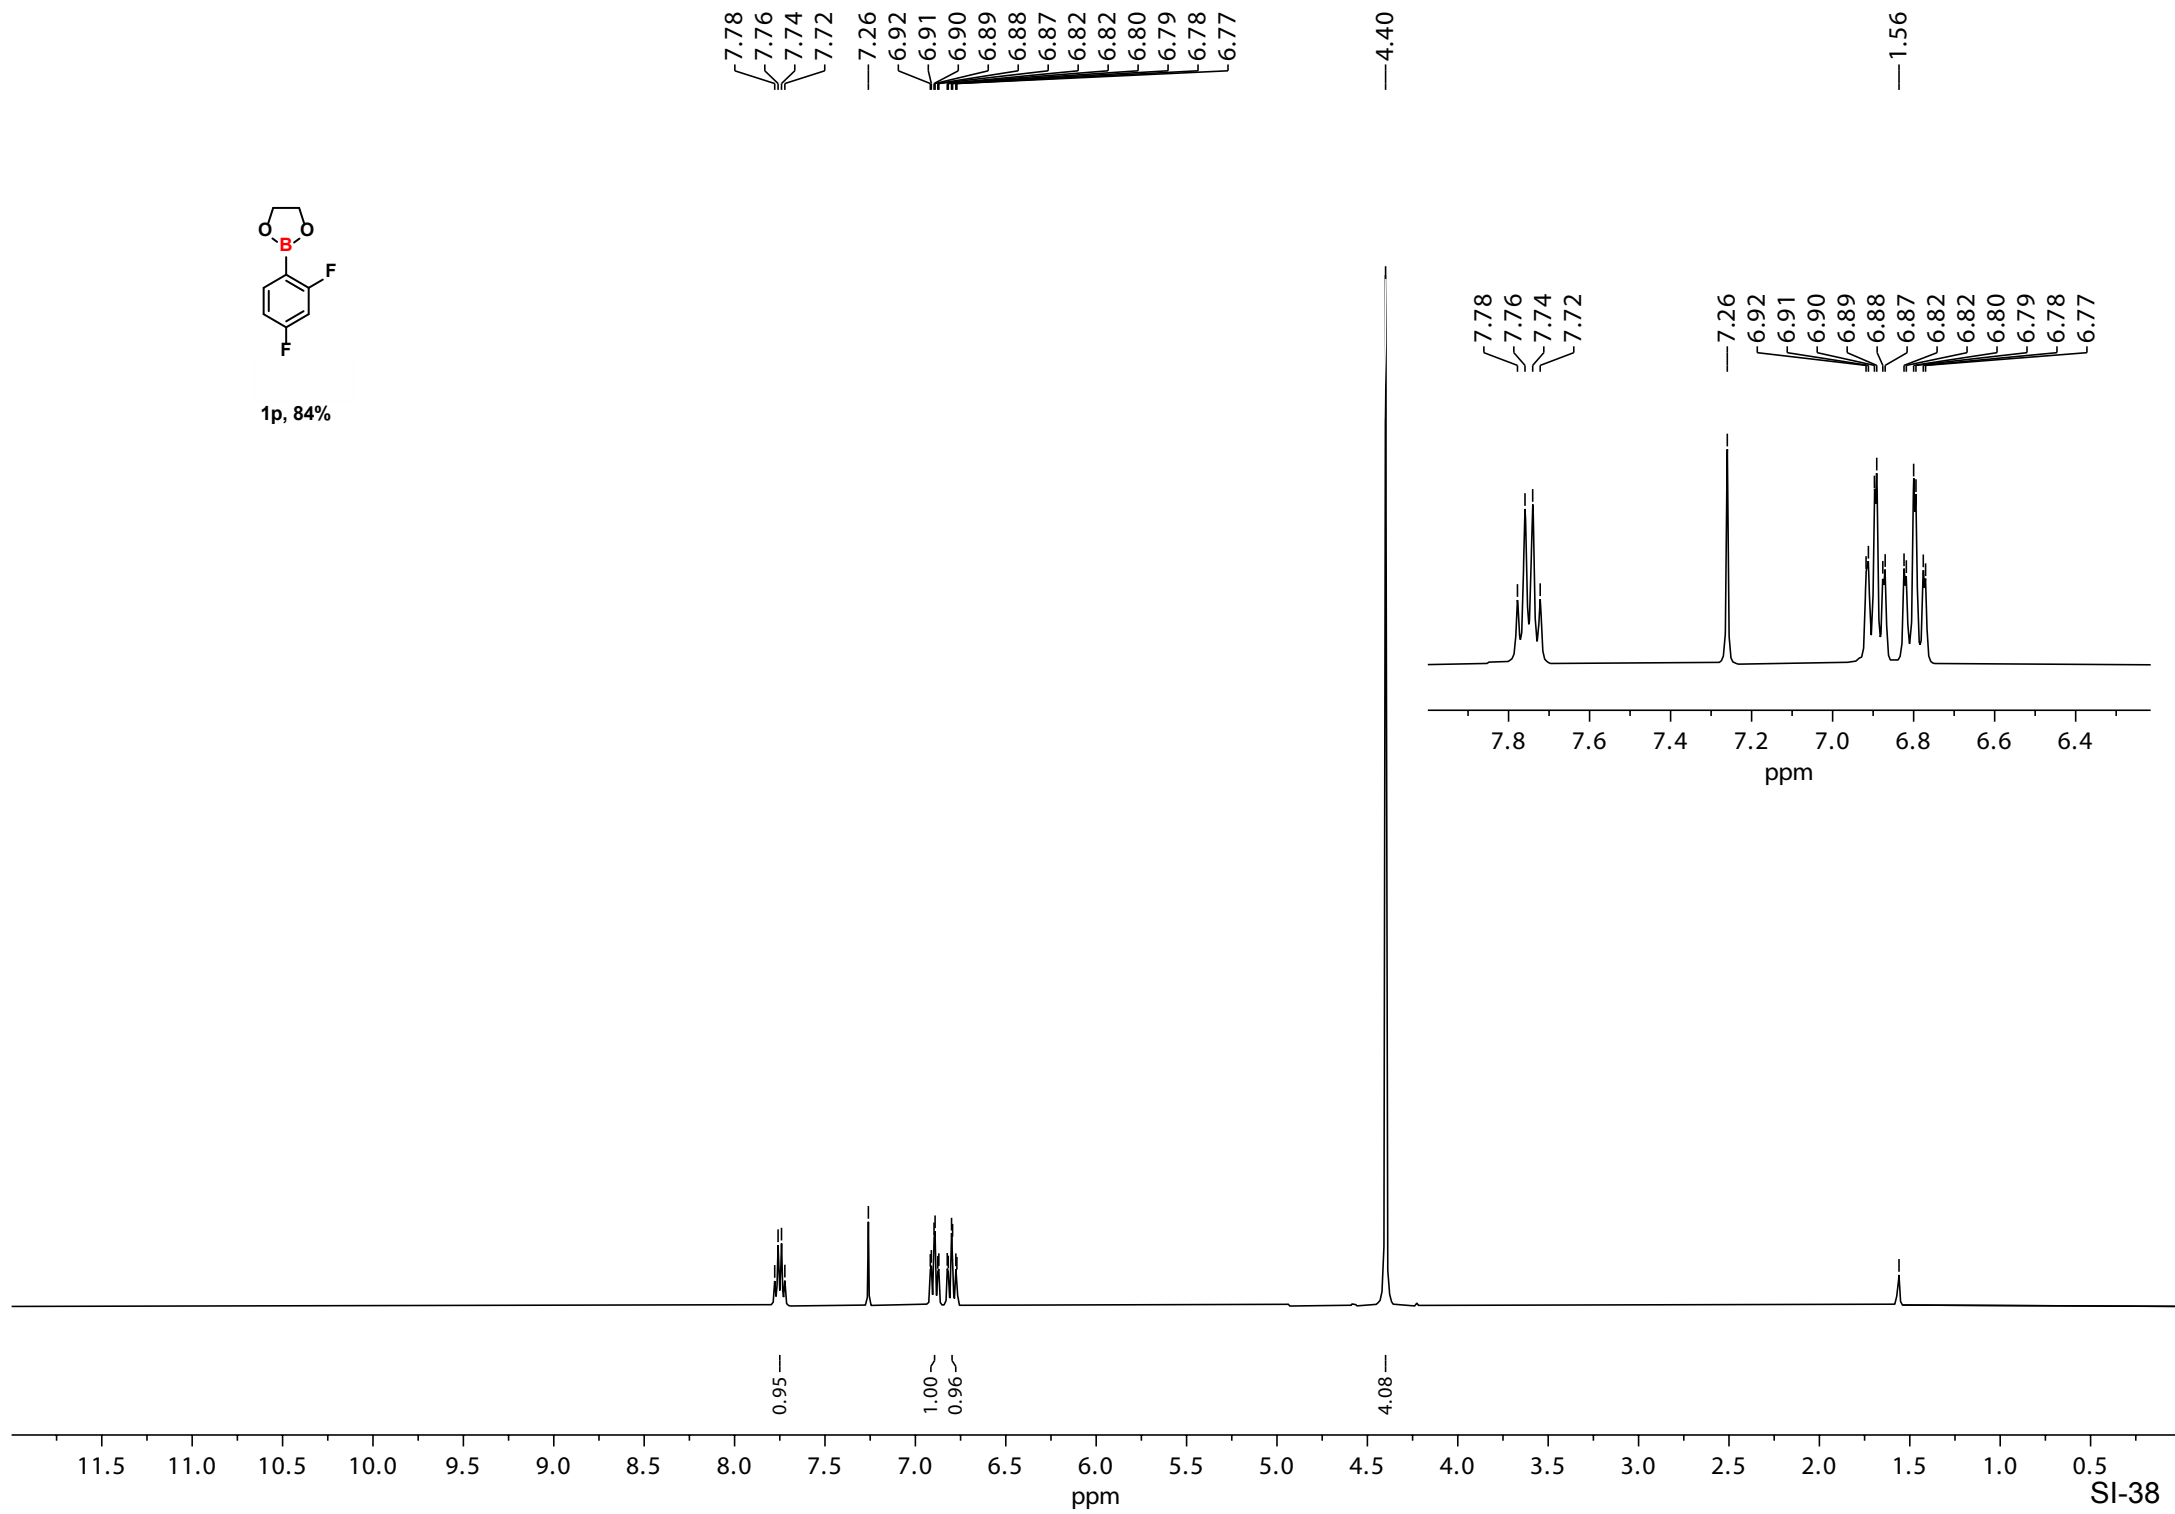

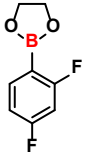

1p, 84%

—30.67

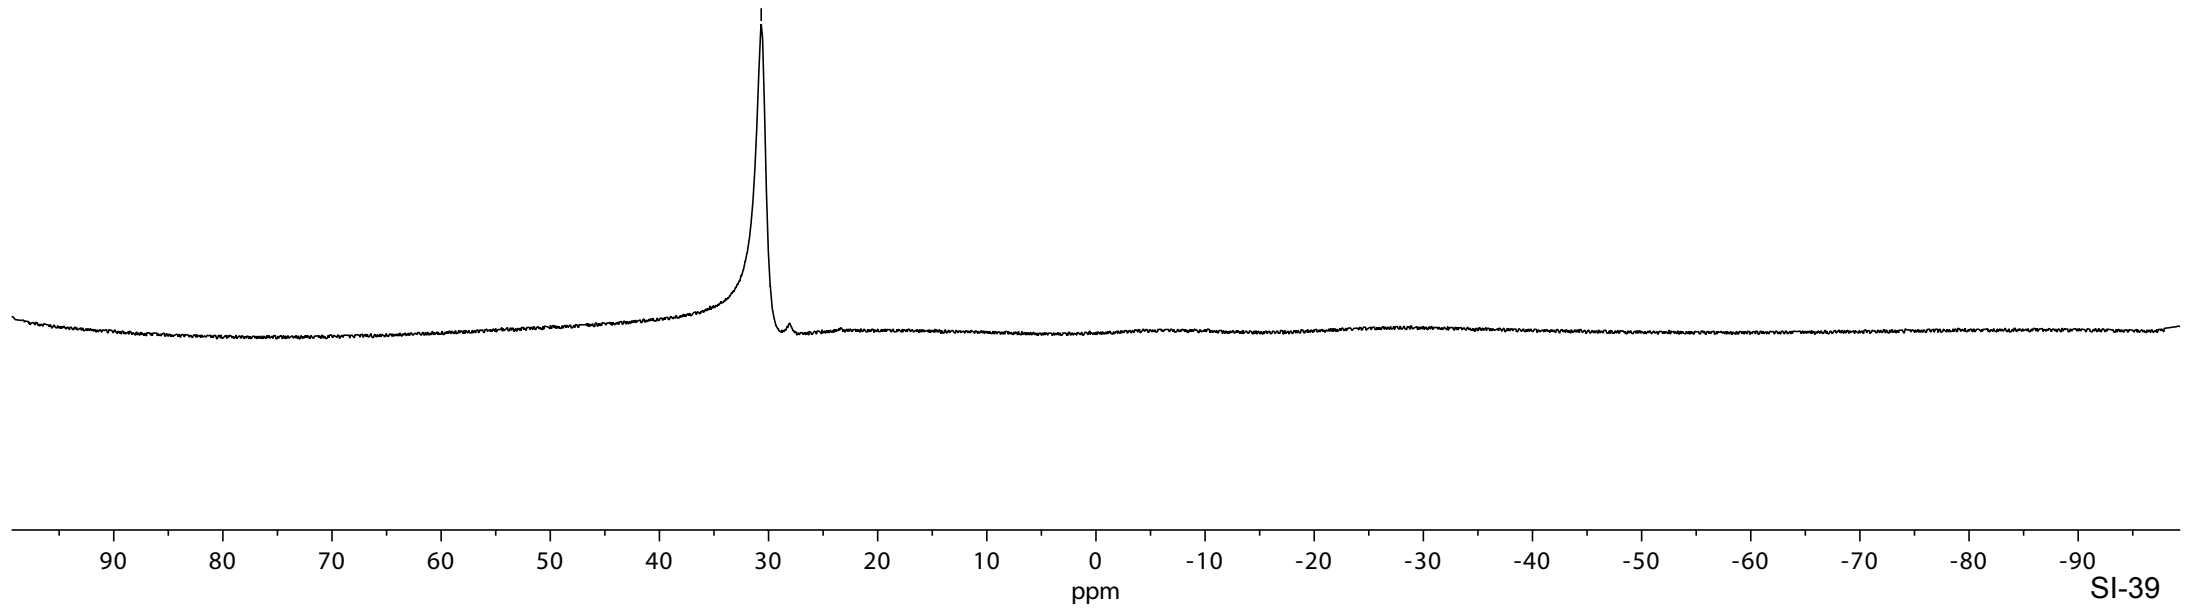

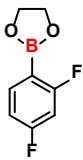

1p, 84%

169.34  
169.22  
167.10  
166.98  
166.82  
166.70  
164.58  
164.46

138.42  
138.32  
138.22

111.54  
111.50  
111.34  
111.30  
104.13  
103.88  
103.85  
103.61

77.34  
77.02  
76.71

66.05

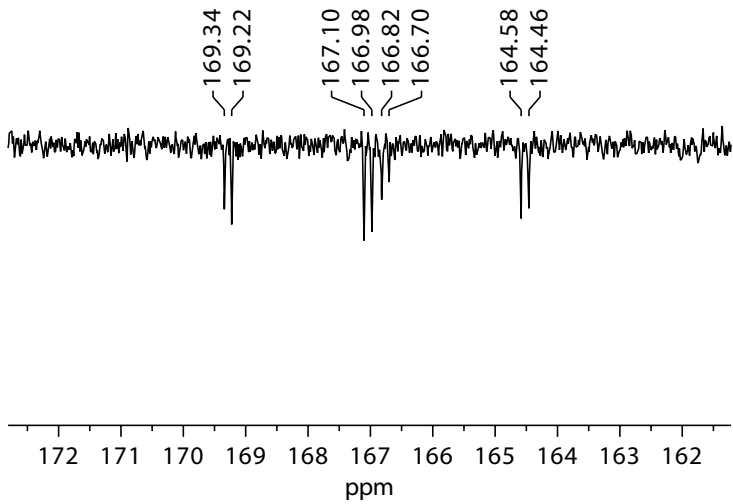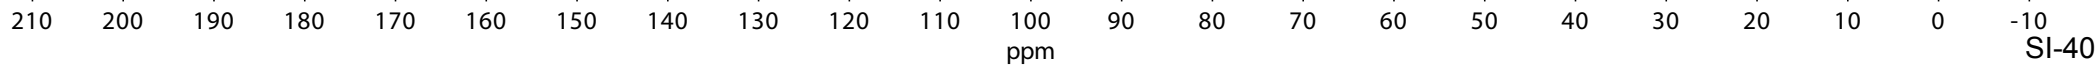



1p, 84%

-99.00  
-99.02  
-99.03  
-99.05  
-99.06  
-99.08  
-104.32  
-104.35  
-104.35  
-104.37  
-104.39  
-104.40  
-104.42

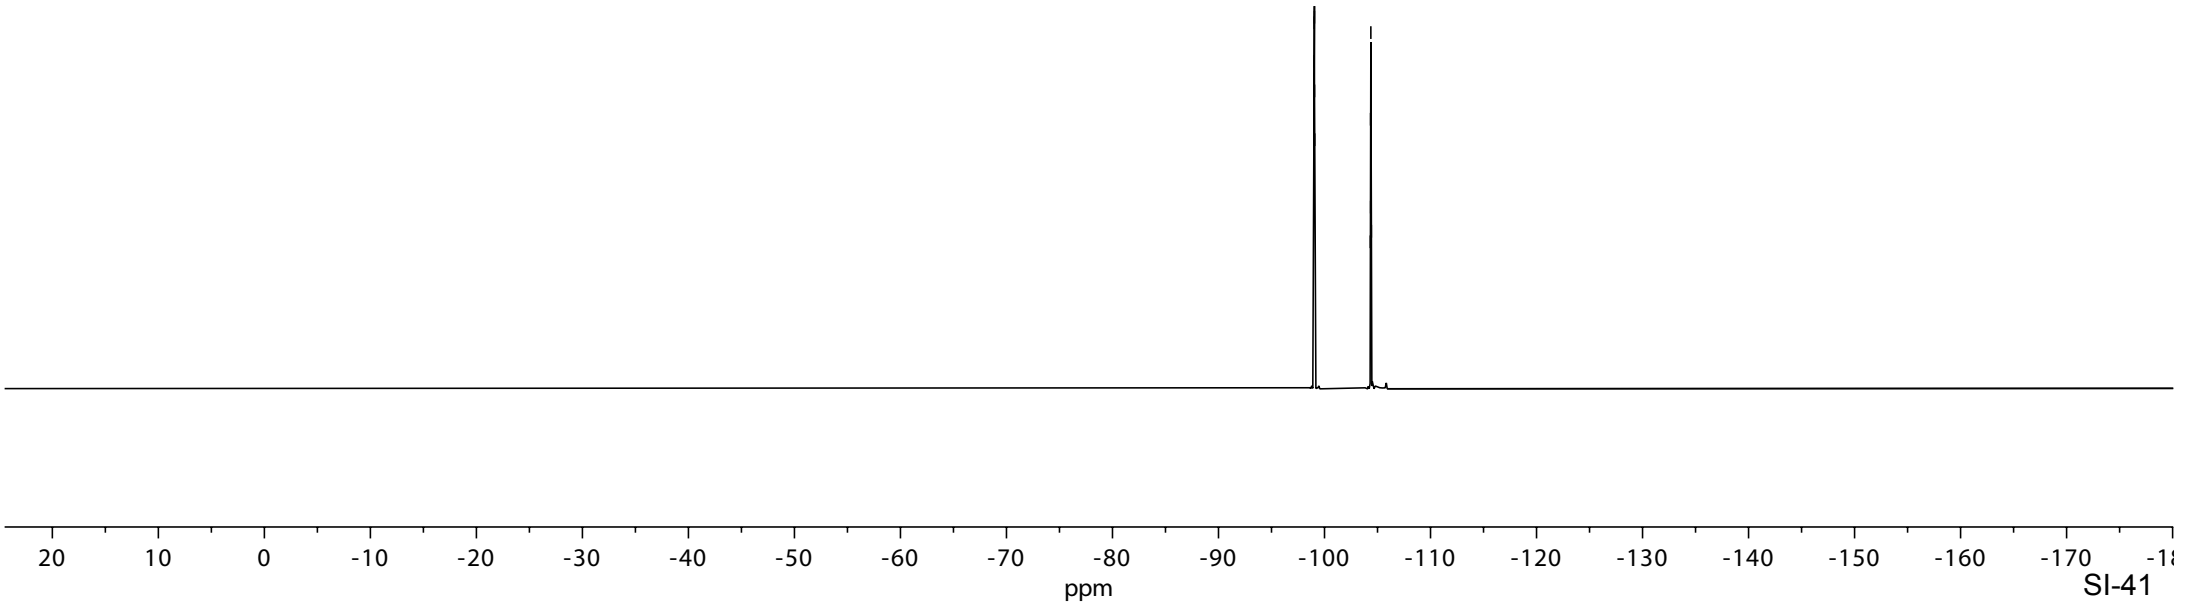

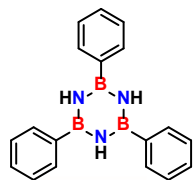

11, 98%

7.80  
7.80  
7.79  
7.78  
7.49  
7.48  
7.48  
7.47  
7.47  
7.46  
7.26

—5.91

—1.54

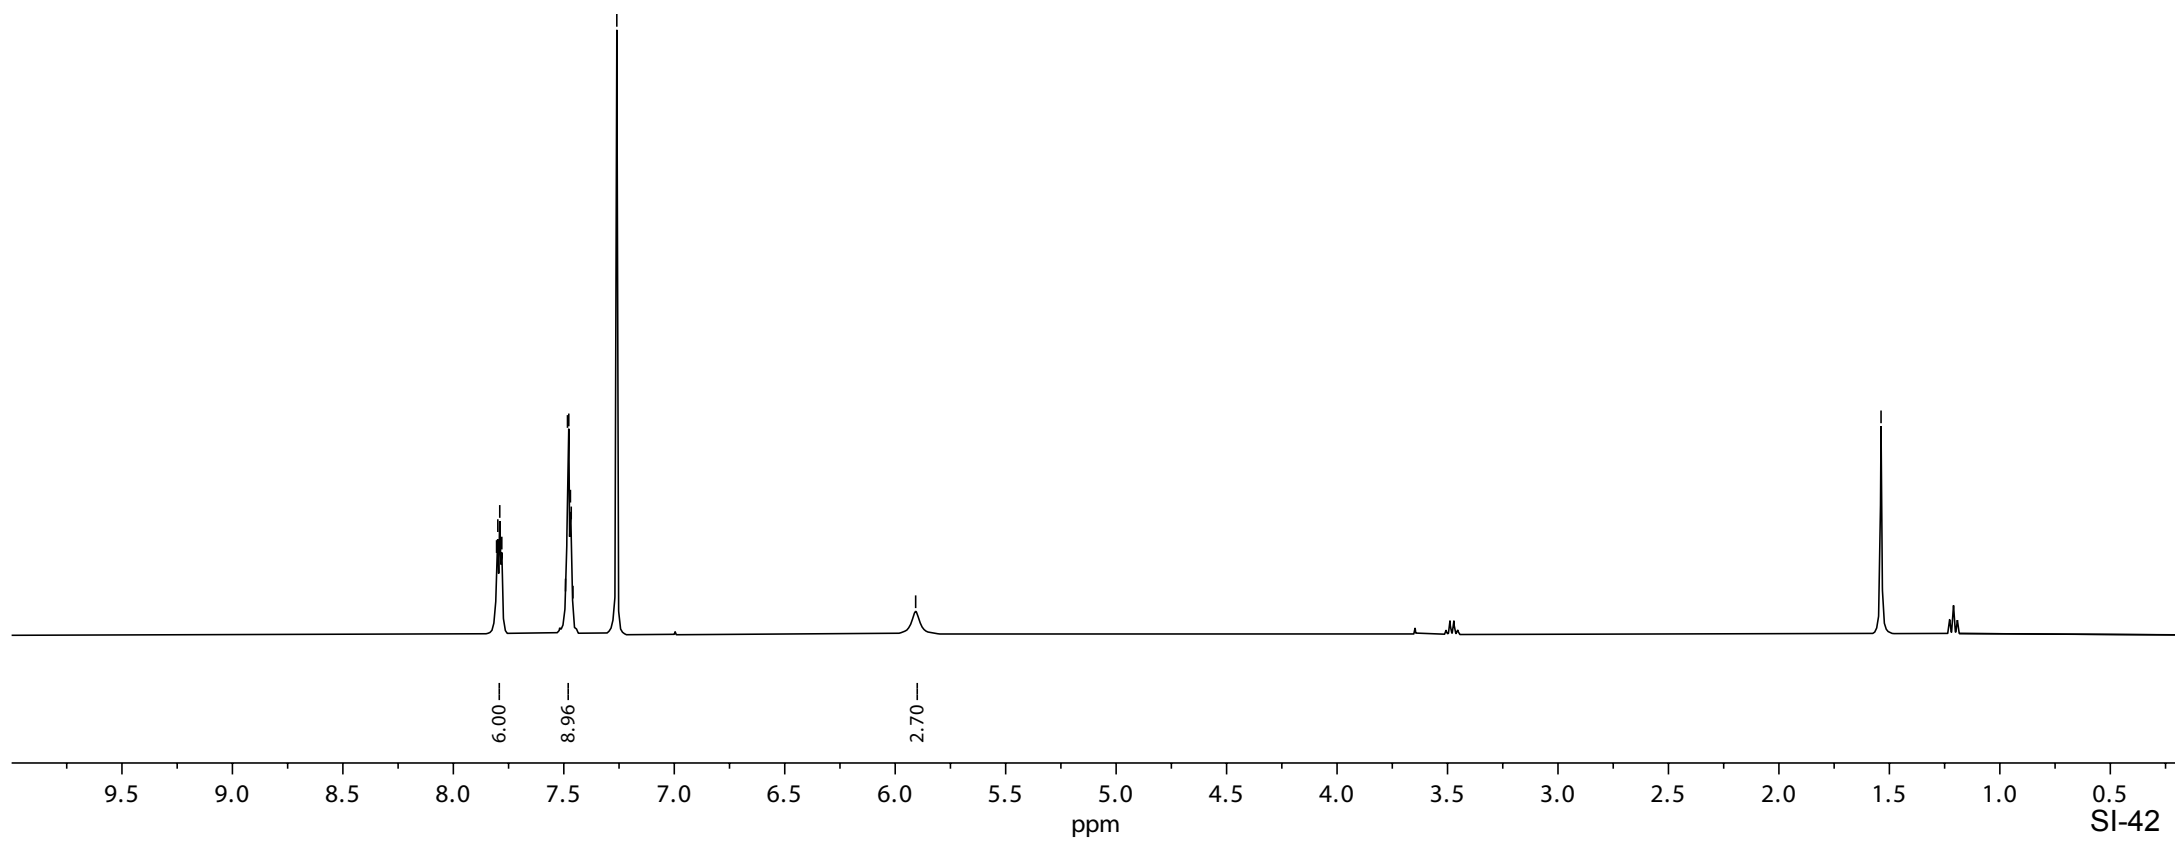

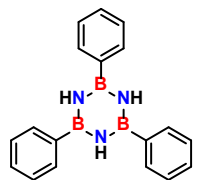

11, 98%

—33.55

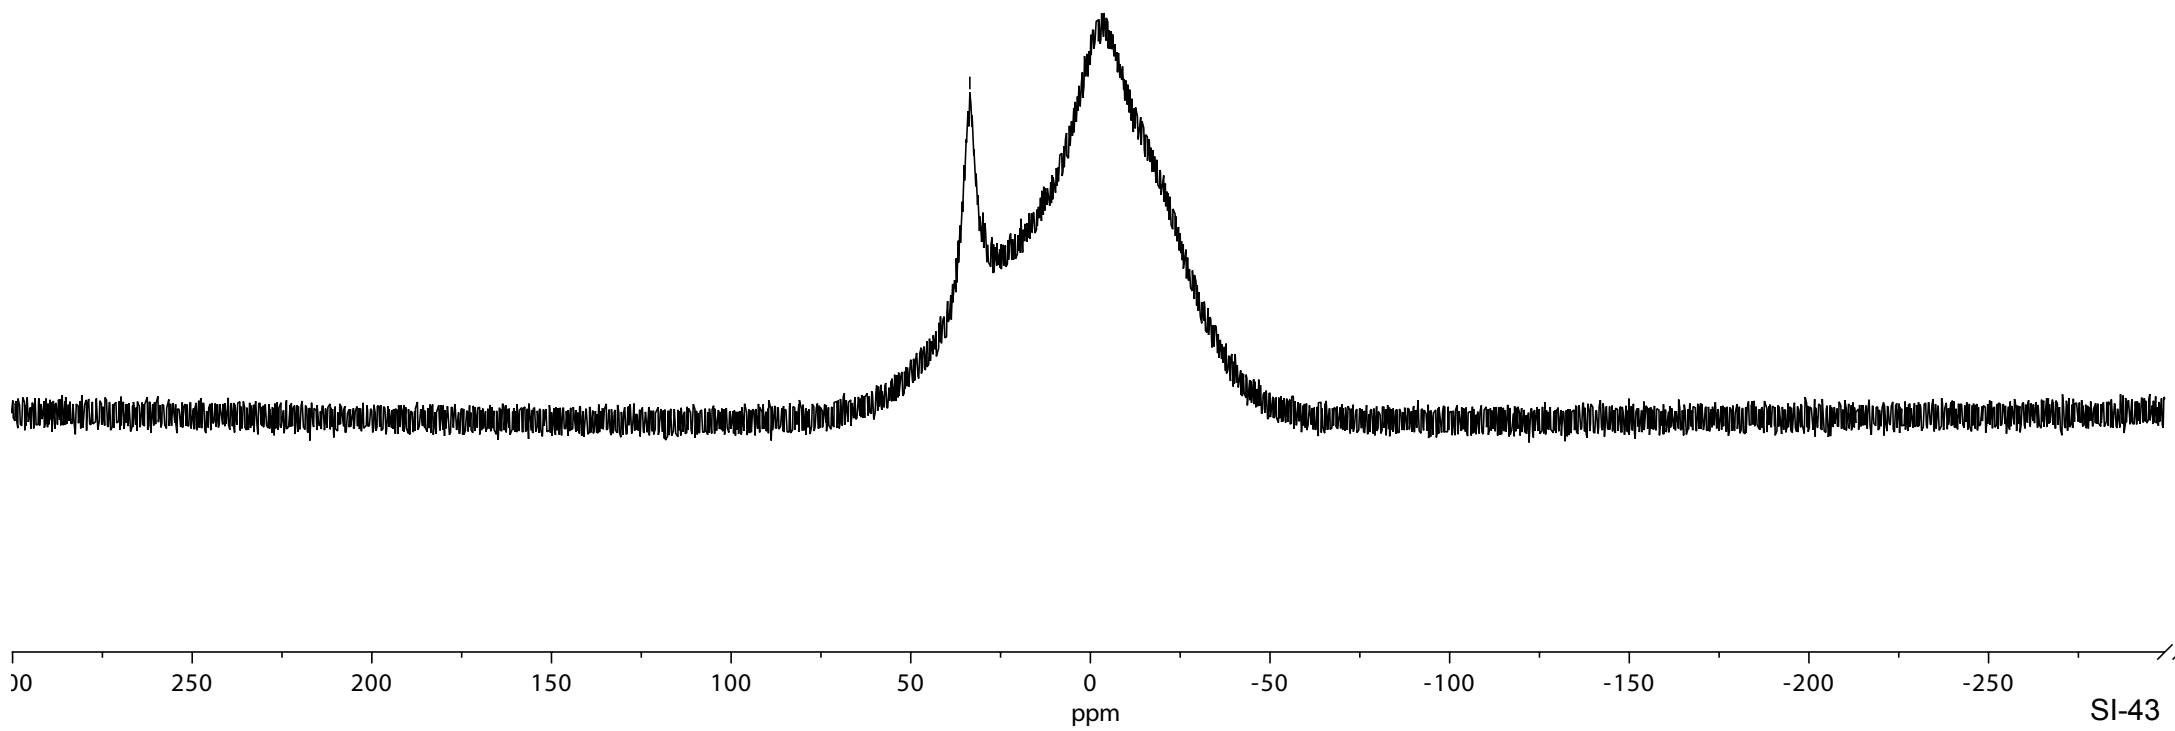

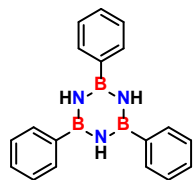

11, 98%

131.94  
130.03  
128.22

77.34  
77.02  
76.70

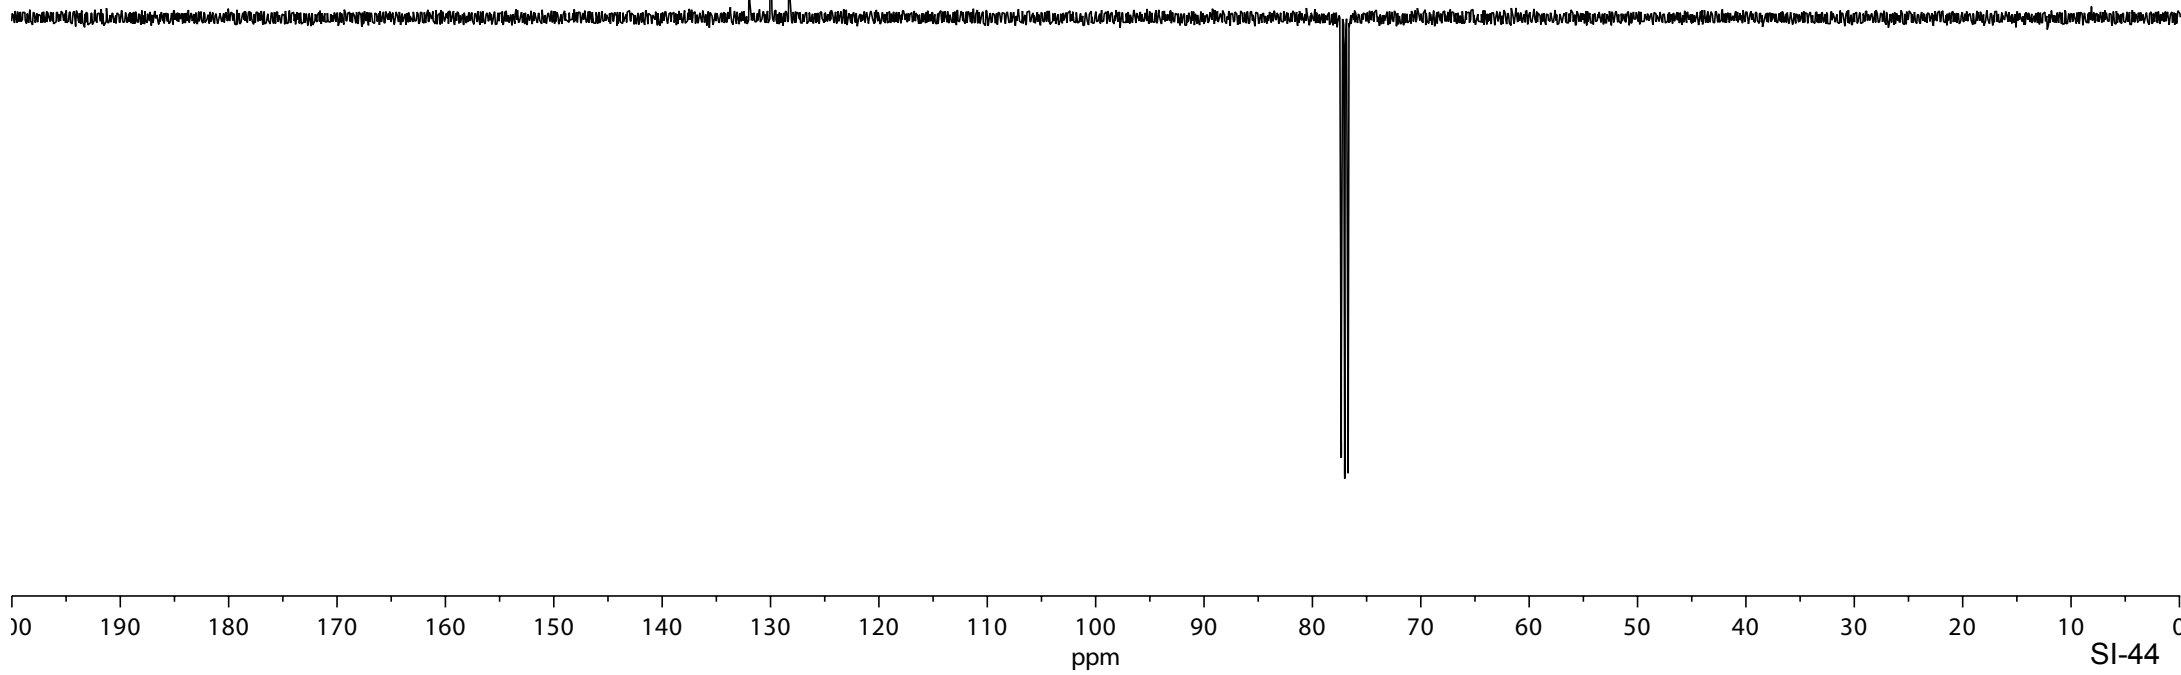

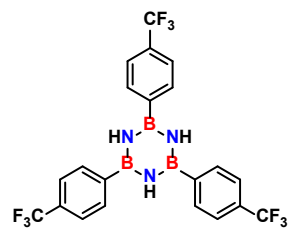

11a, 98%

7.89  
7.87  
7.74  
7.72

7.26

5.94

1.55

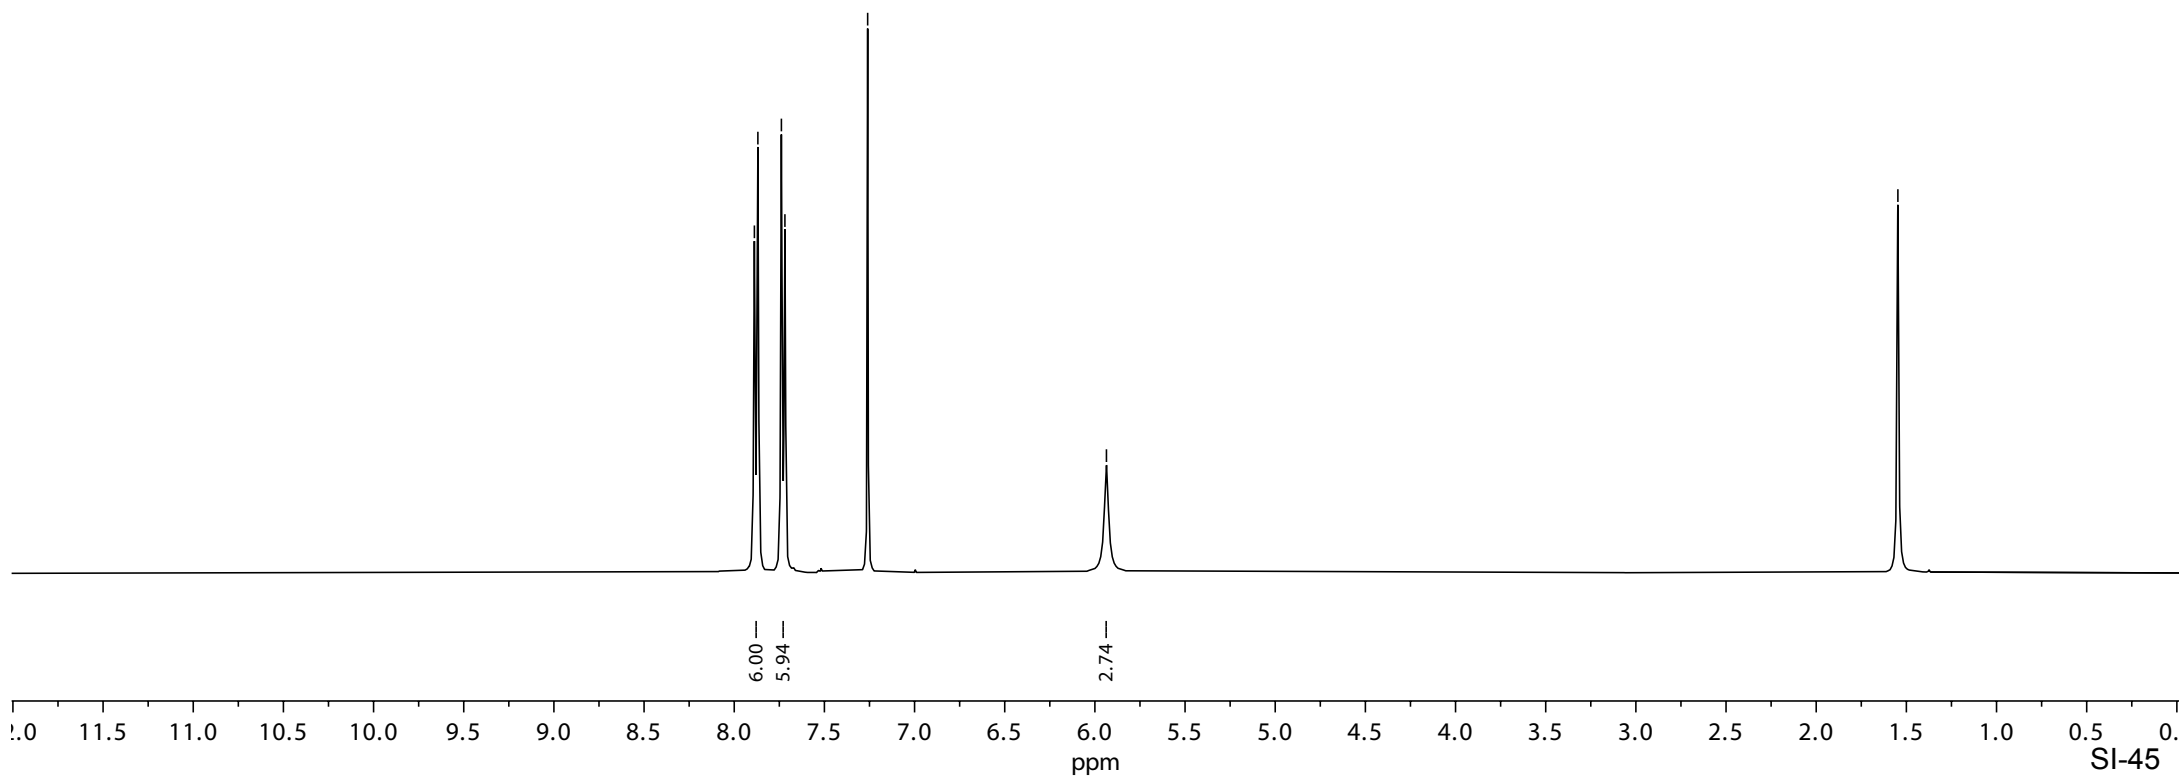

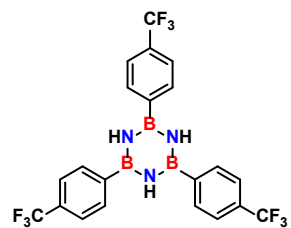

11a, 98%

—33.42

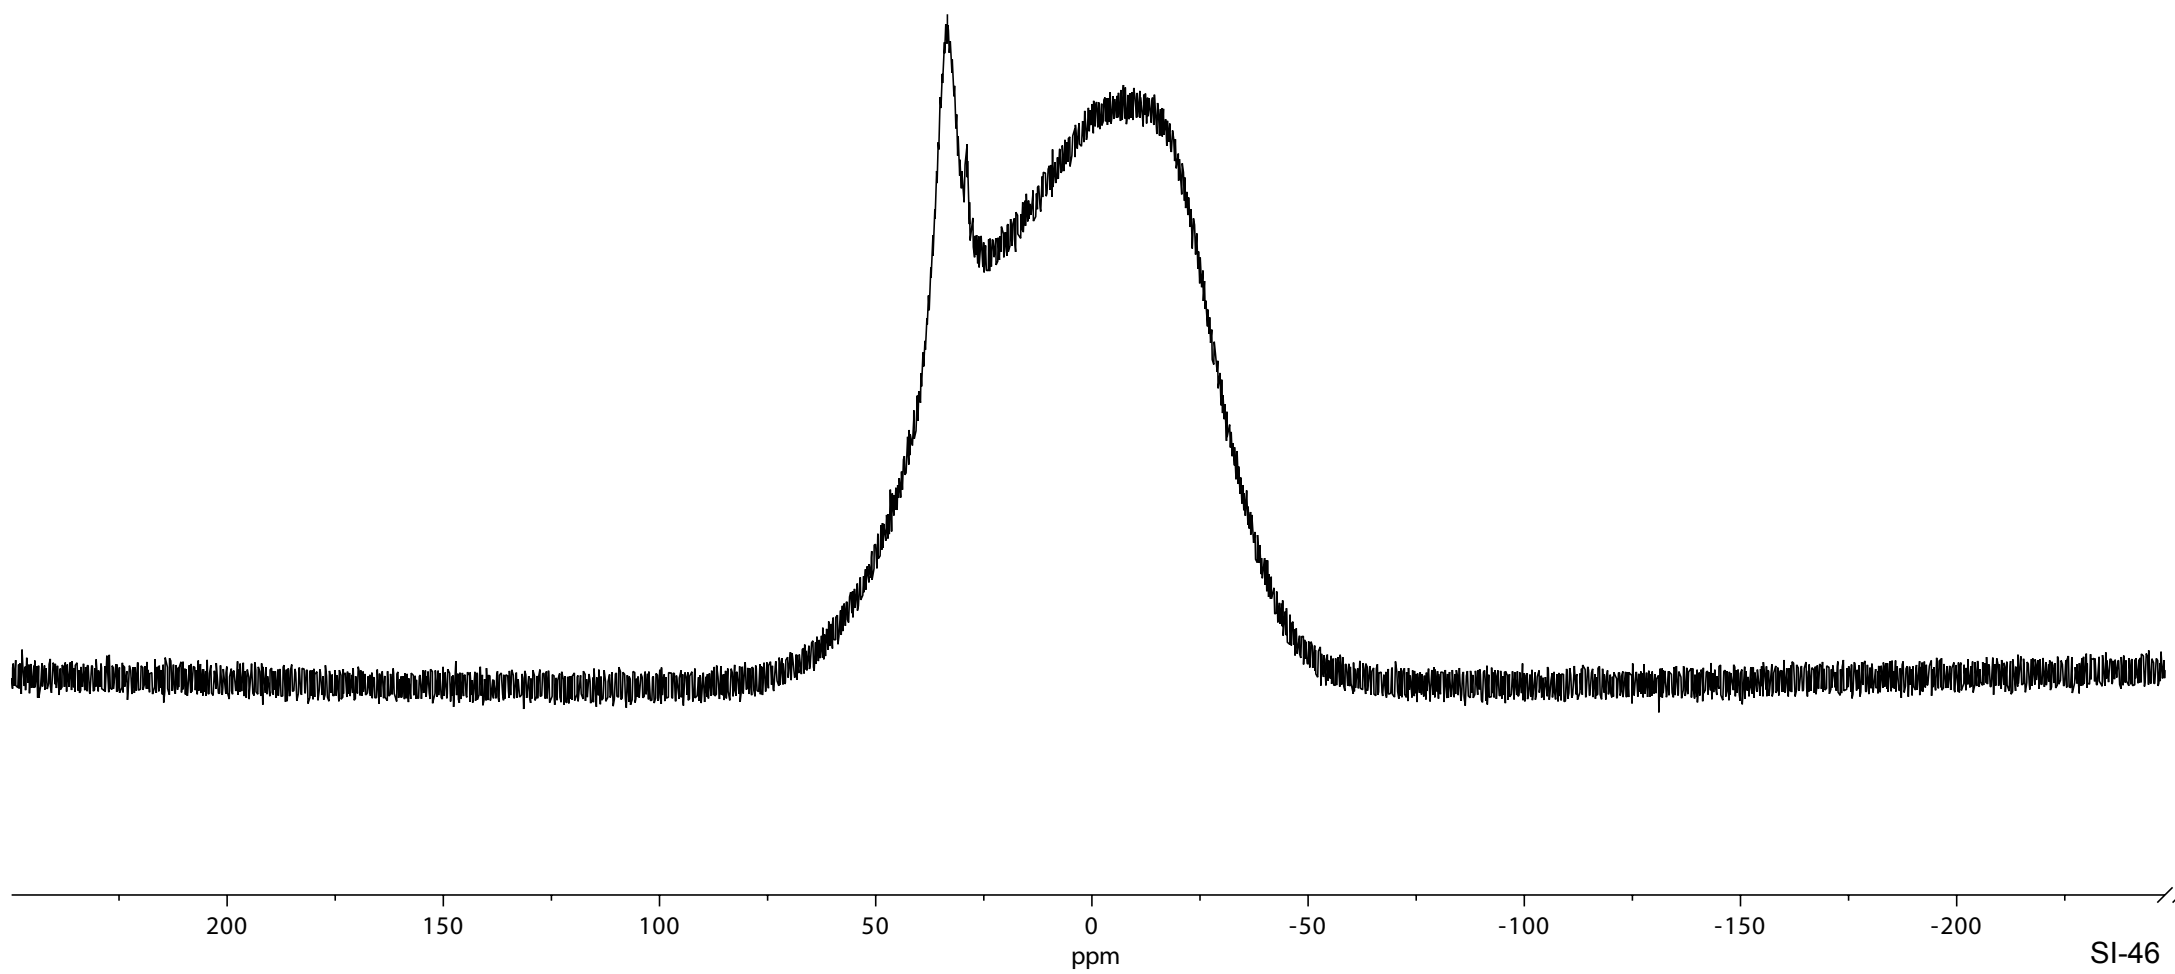

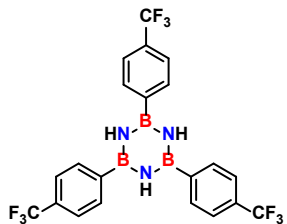

11a, 98%

132.28  
132.27  
132.23  
131.95  
131.62  
128.19  
125.48  
125.05  
125.01  
124.97  
124.93  
122.78  
120.07

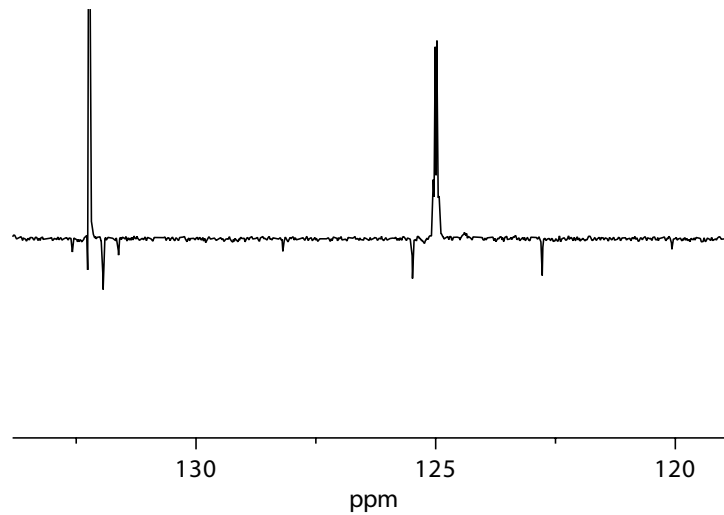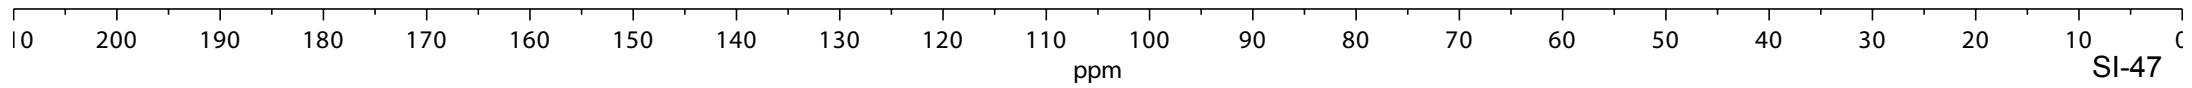



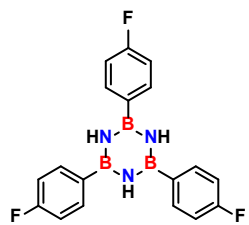

**11b, 90%**

7.77  
7.76  
7.75  
7.74  
7.26  
7.18  
7.16  
7.14

—5.78

—1.54

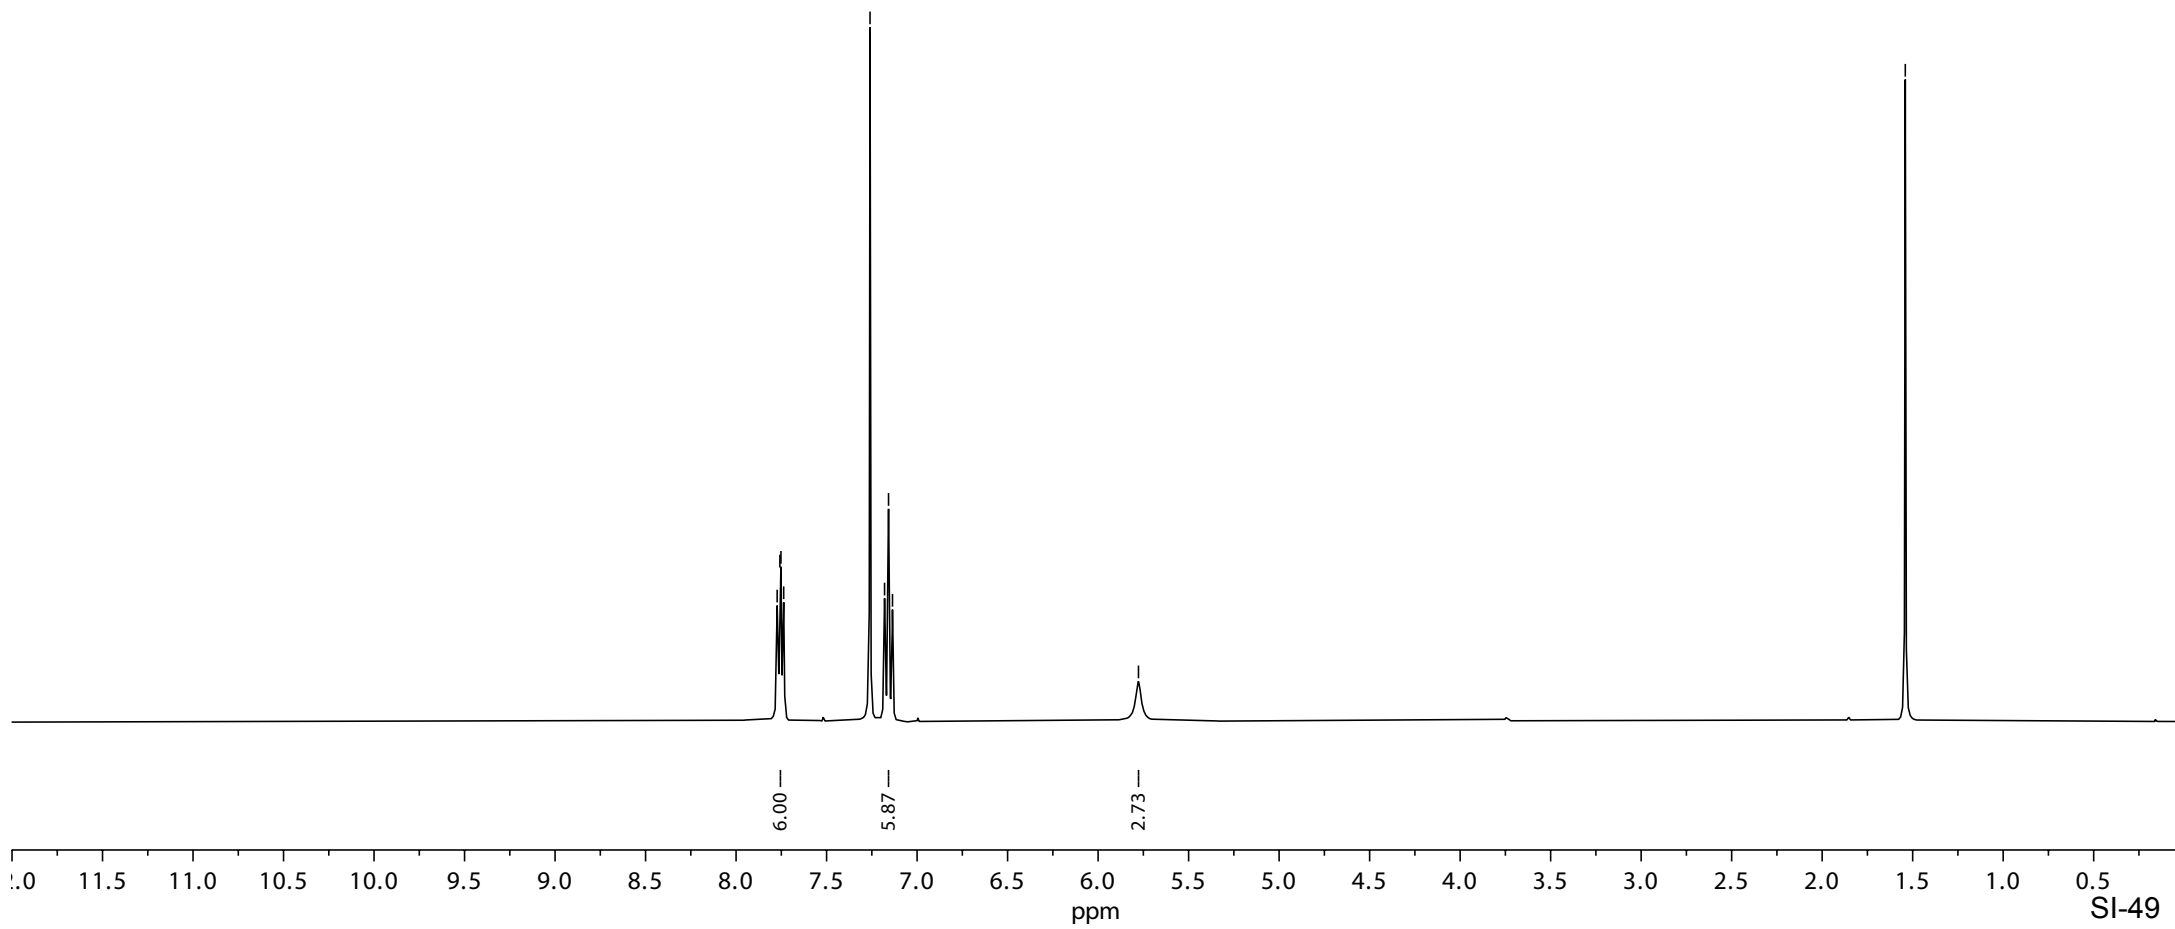

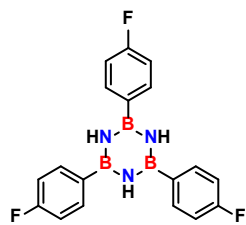

**11b, 90%**

—33.20

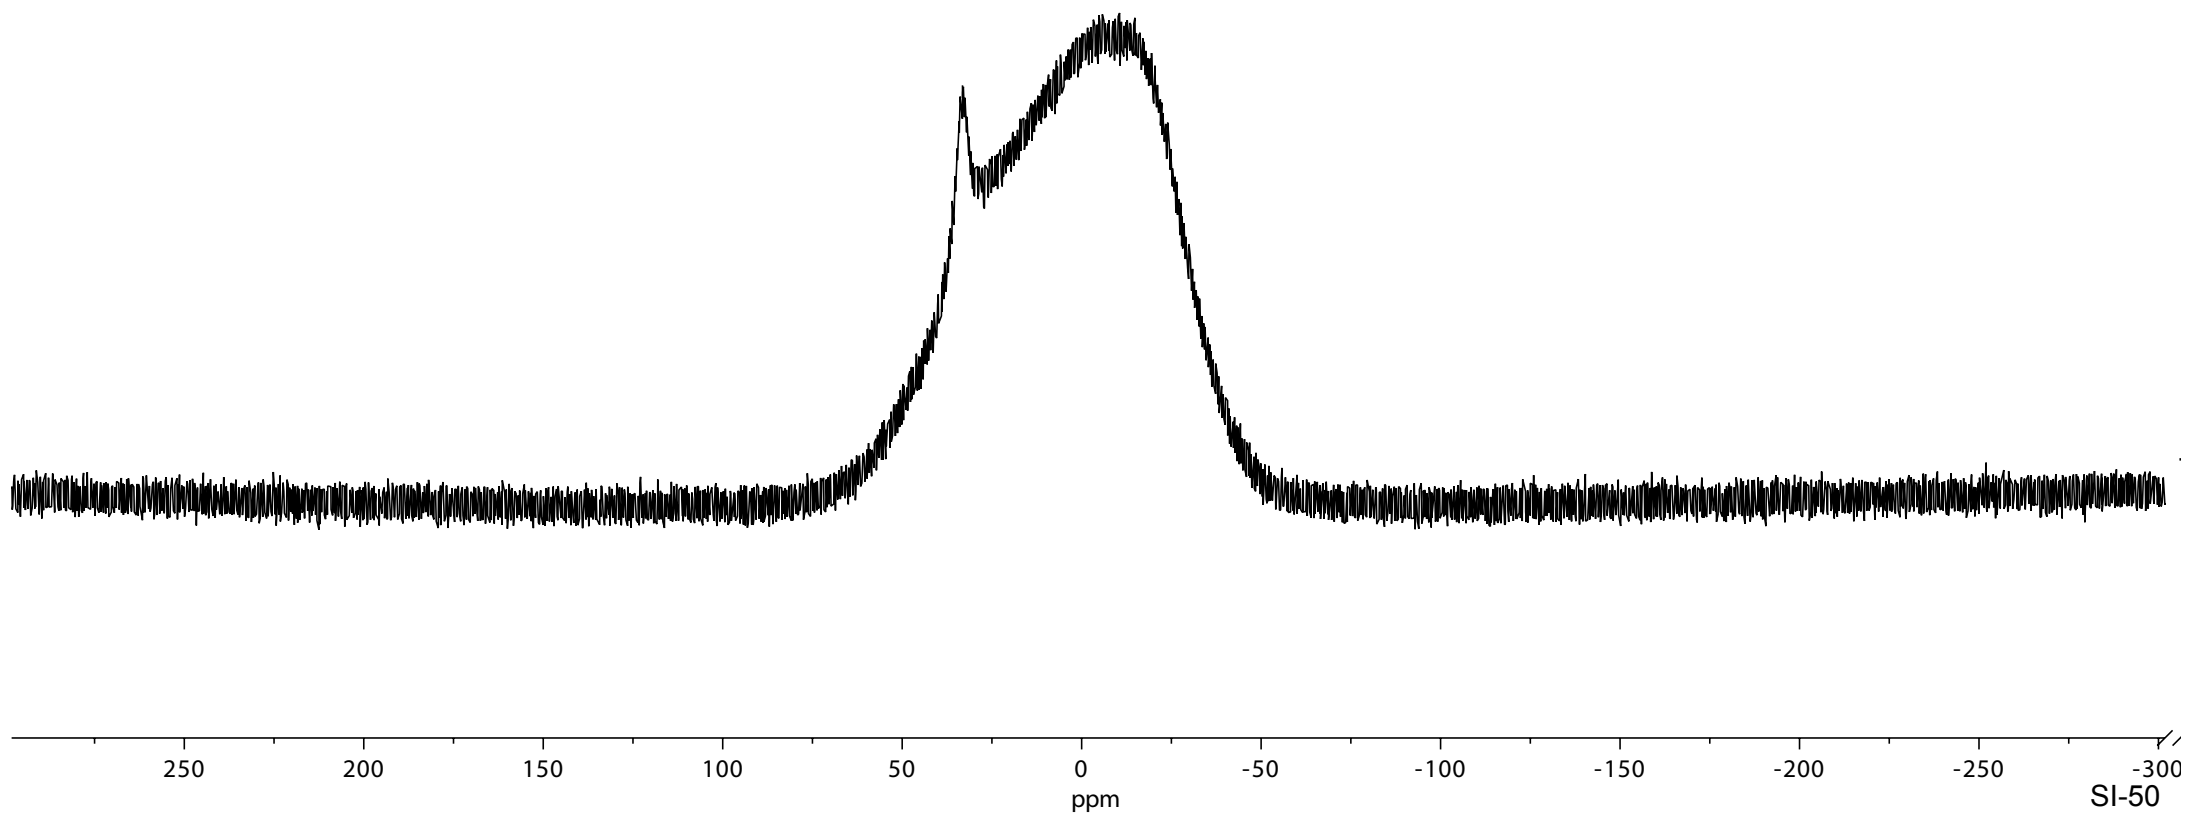

SI-50

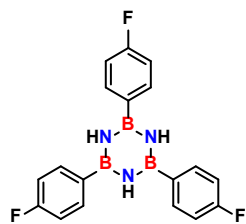

11b, 90%

165.63  
163.15

133.94  
133.86

115.42  
115.22

77.32  
77.01  
76.69

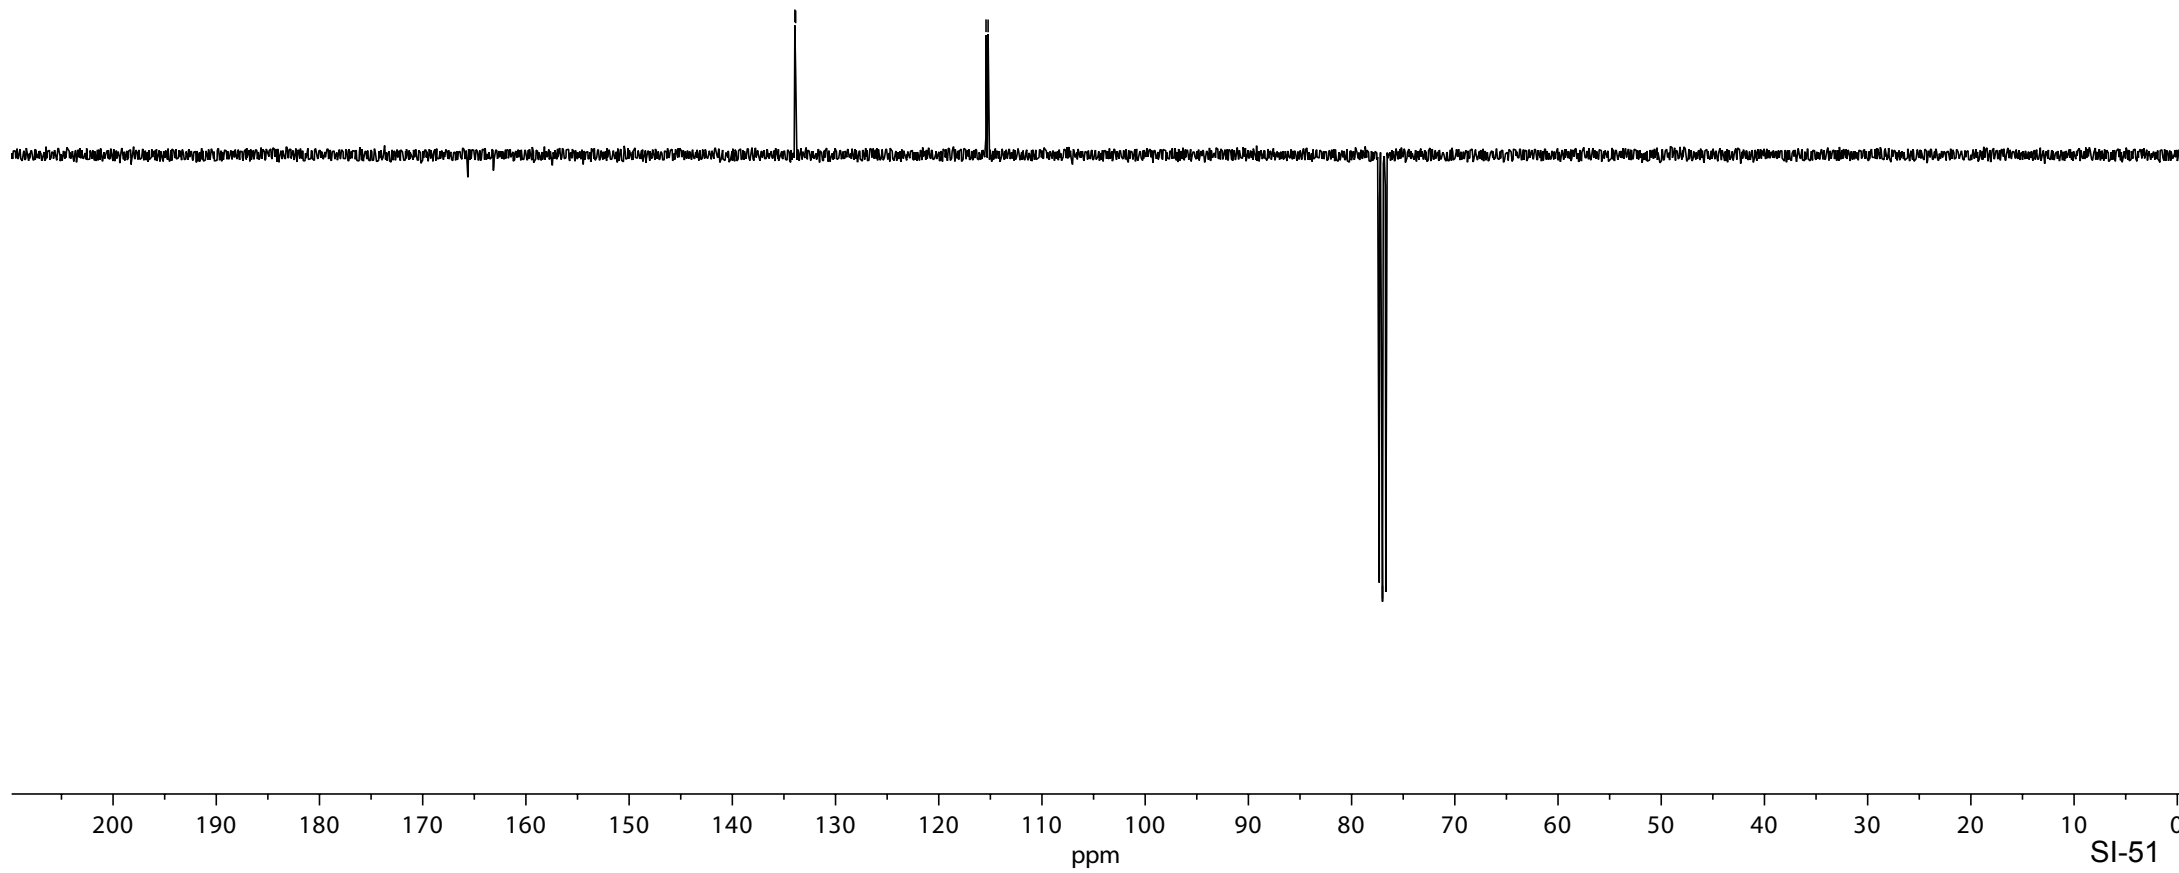



11b, 90%

110.52  
110.53  
110.54  
110.55  
110.56  
110.57  
110.57  
110.58  
110.60

110.52  
110.53  
110.54  
110.55  
110.56  
110.57  
110.57  
110.58  
110.60

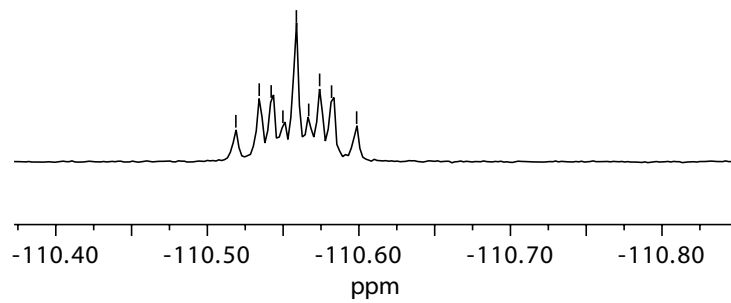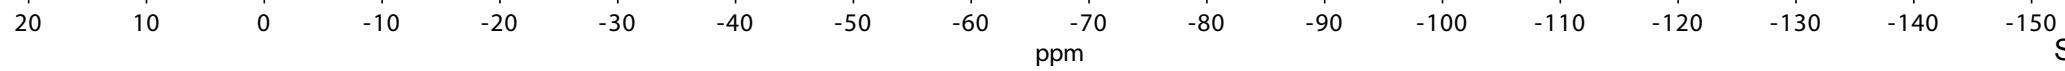

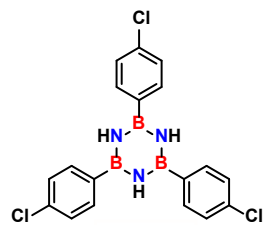

11c, 66%

7.72  
7.70  
7.48  
7.46  
7.28

5.82

1.56

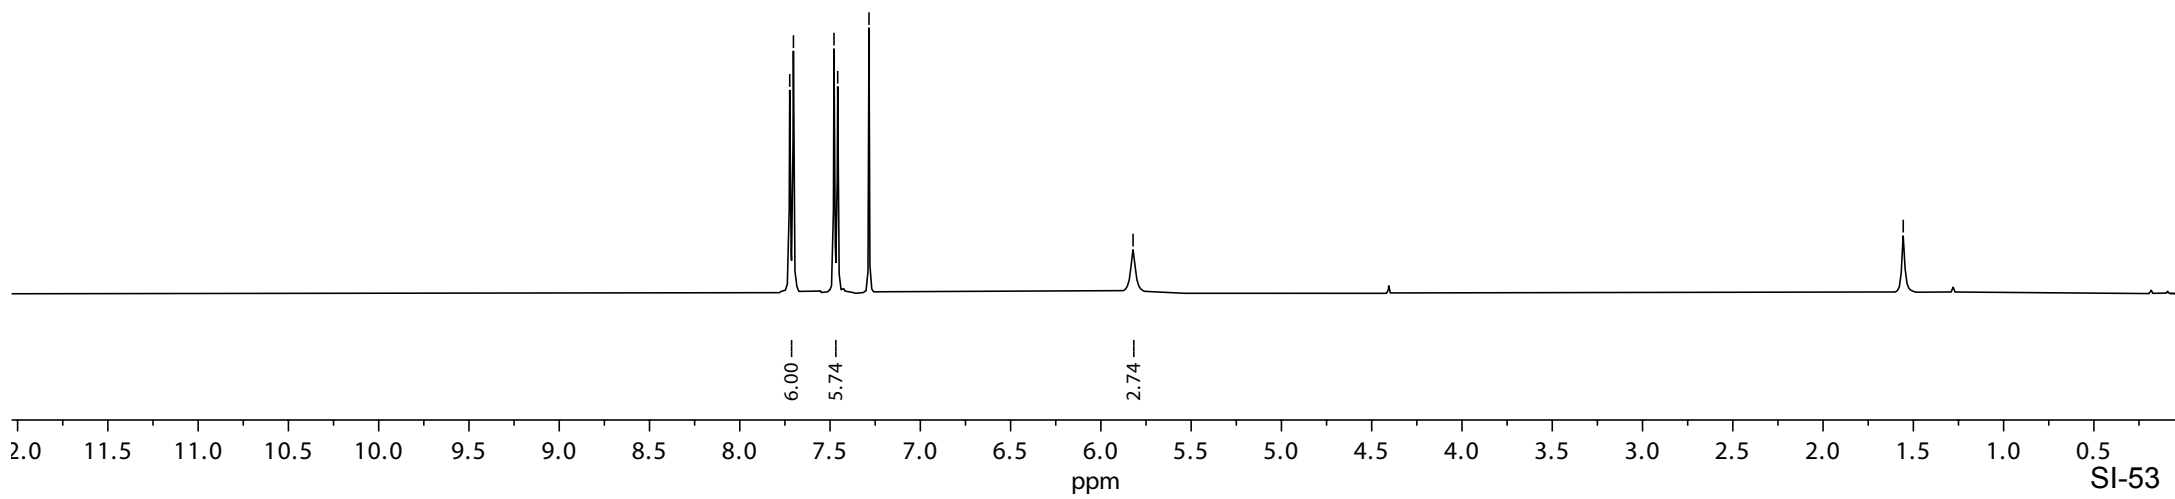

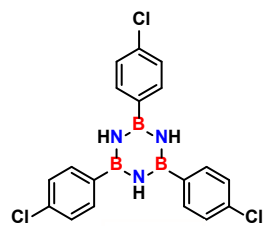

11c, 66%

— 33.23

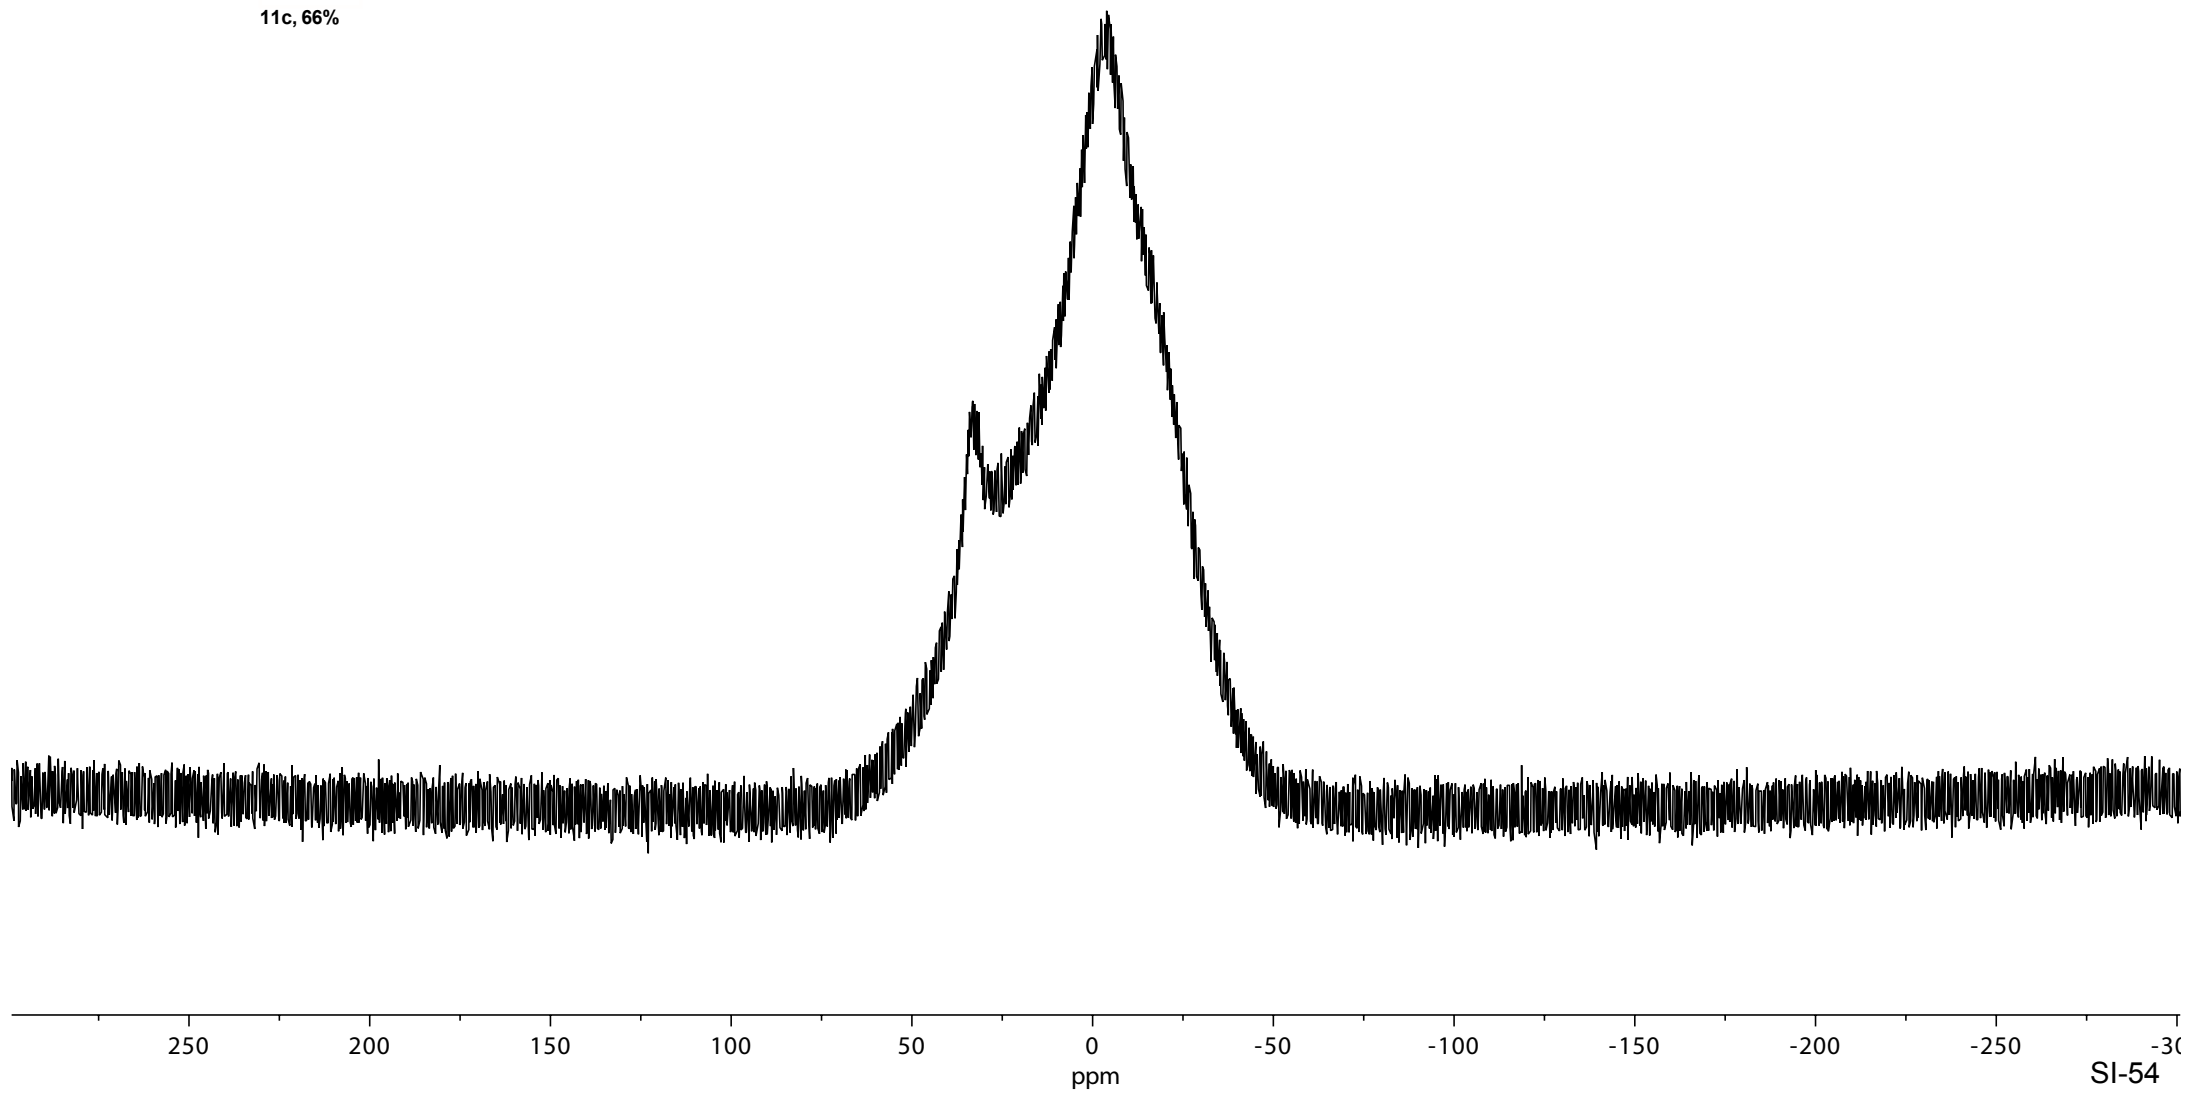

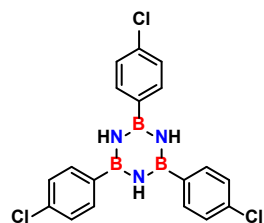

11c, 66%

136.44  
133.30  
128.51

77.32  
77.01  
76.69

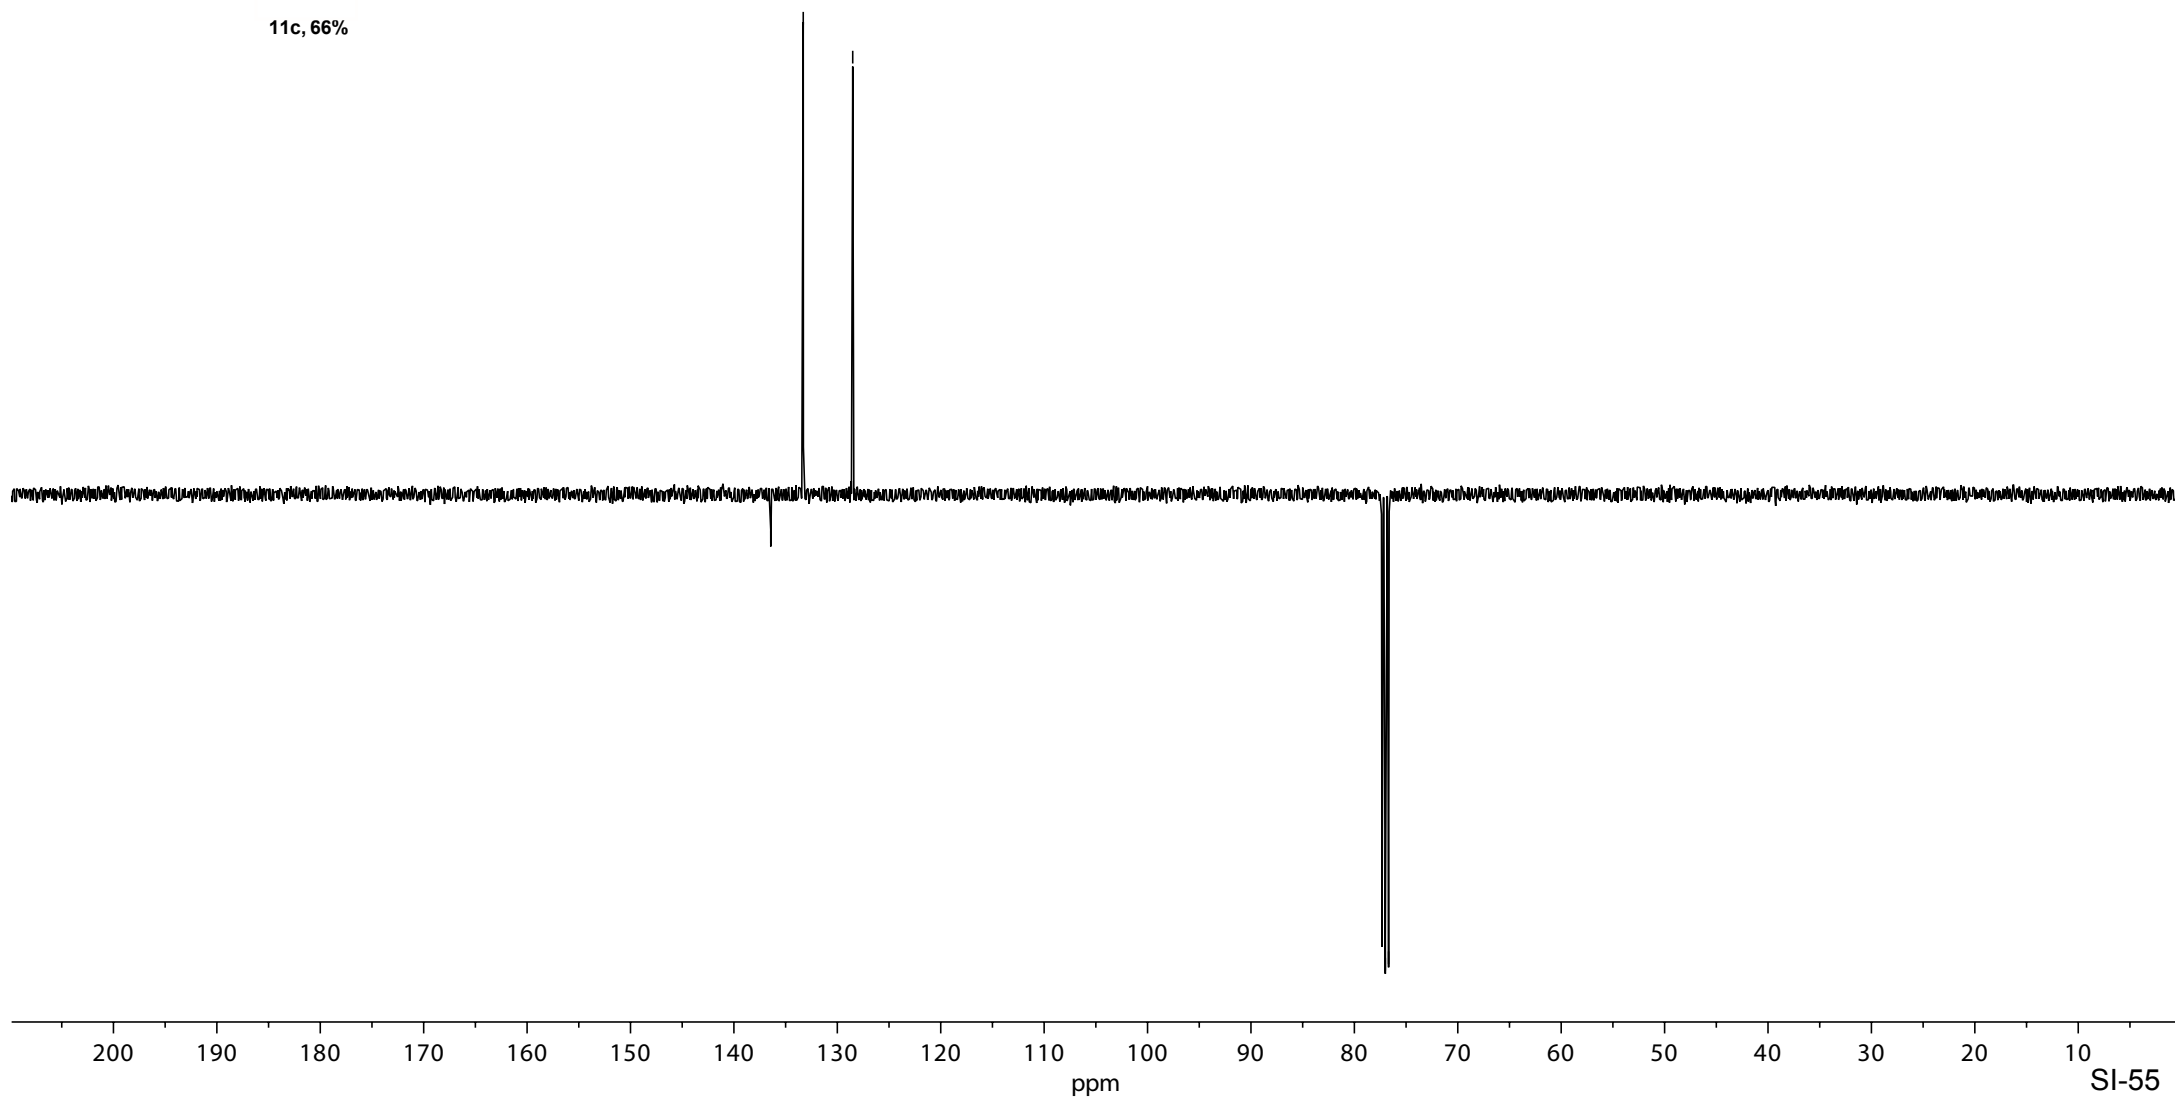

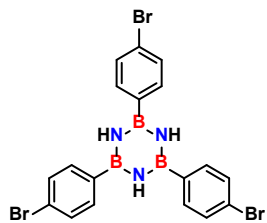

11d, 91%

7.63  
7.63  
7.61  
7.61  
7.59  
7.59  
7.26

5.80

1.54

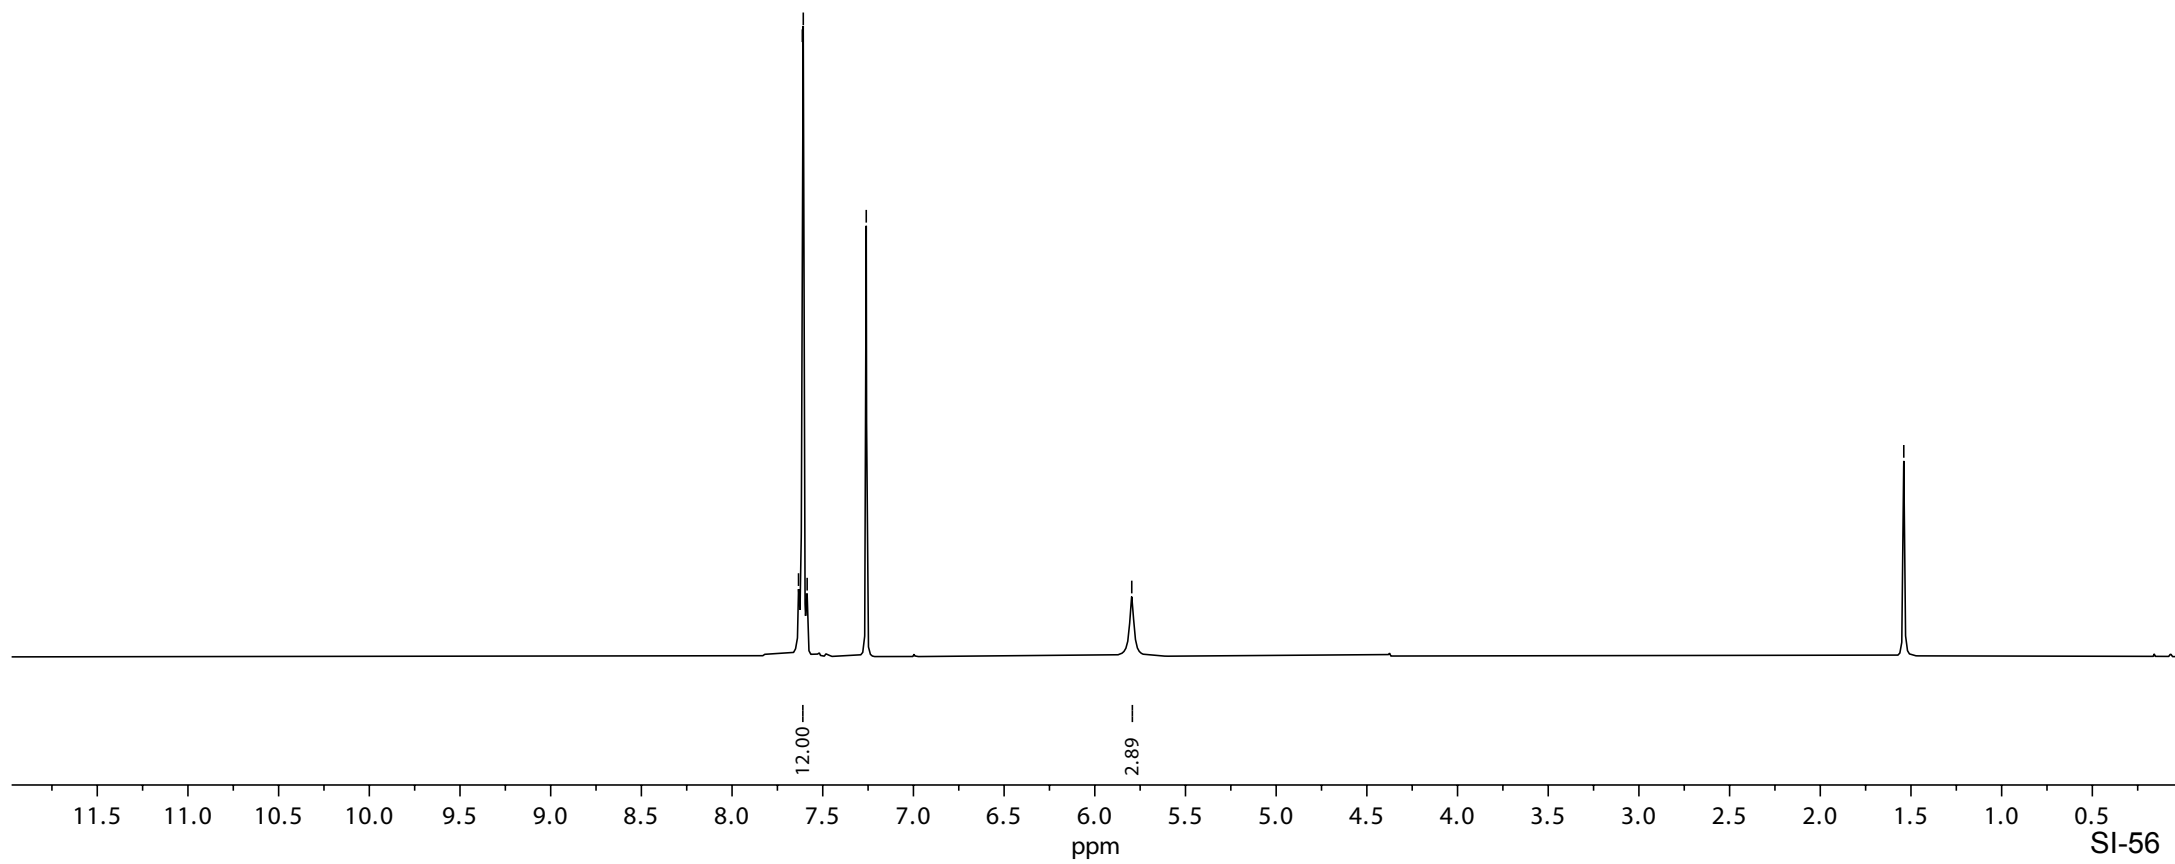

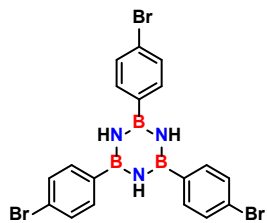

11d, 91%

—33.24

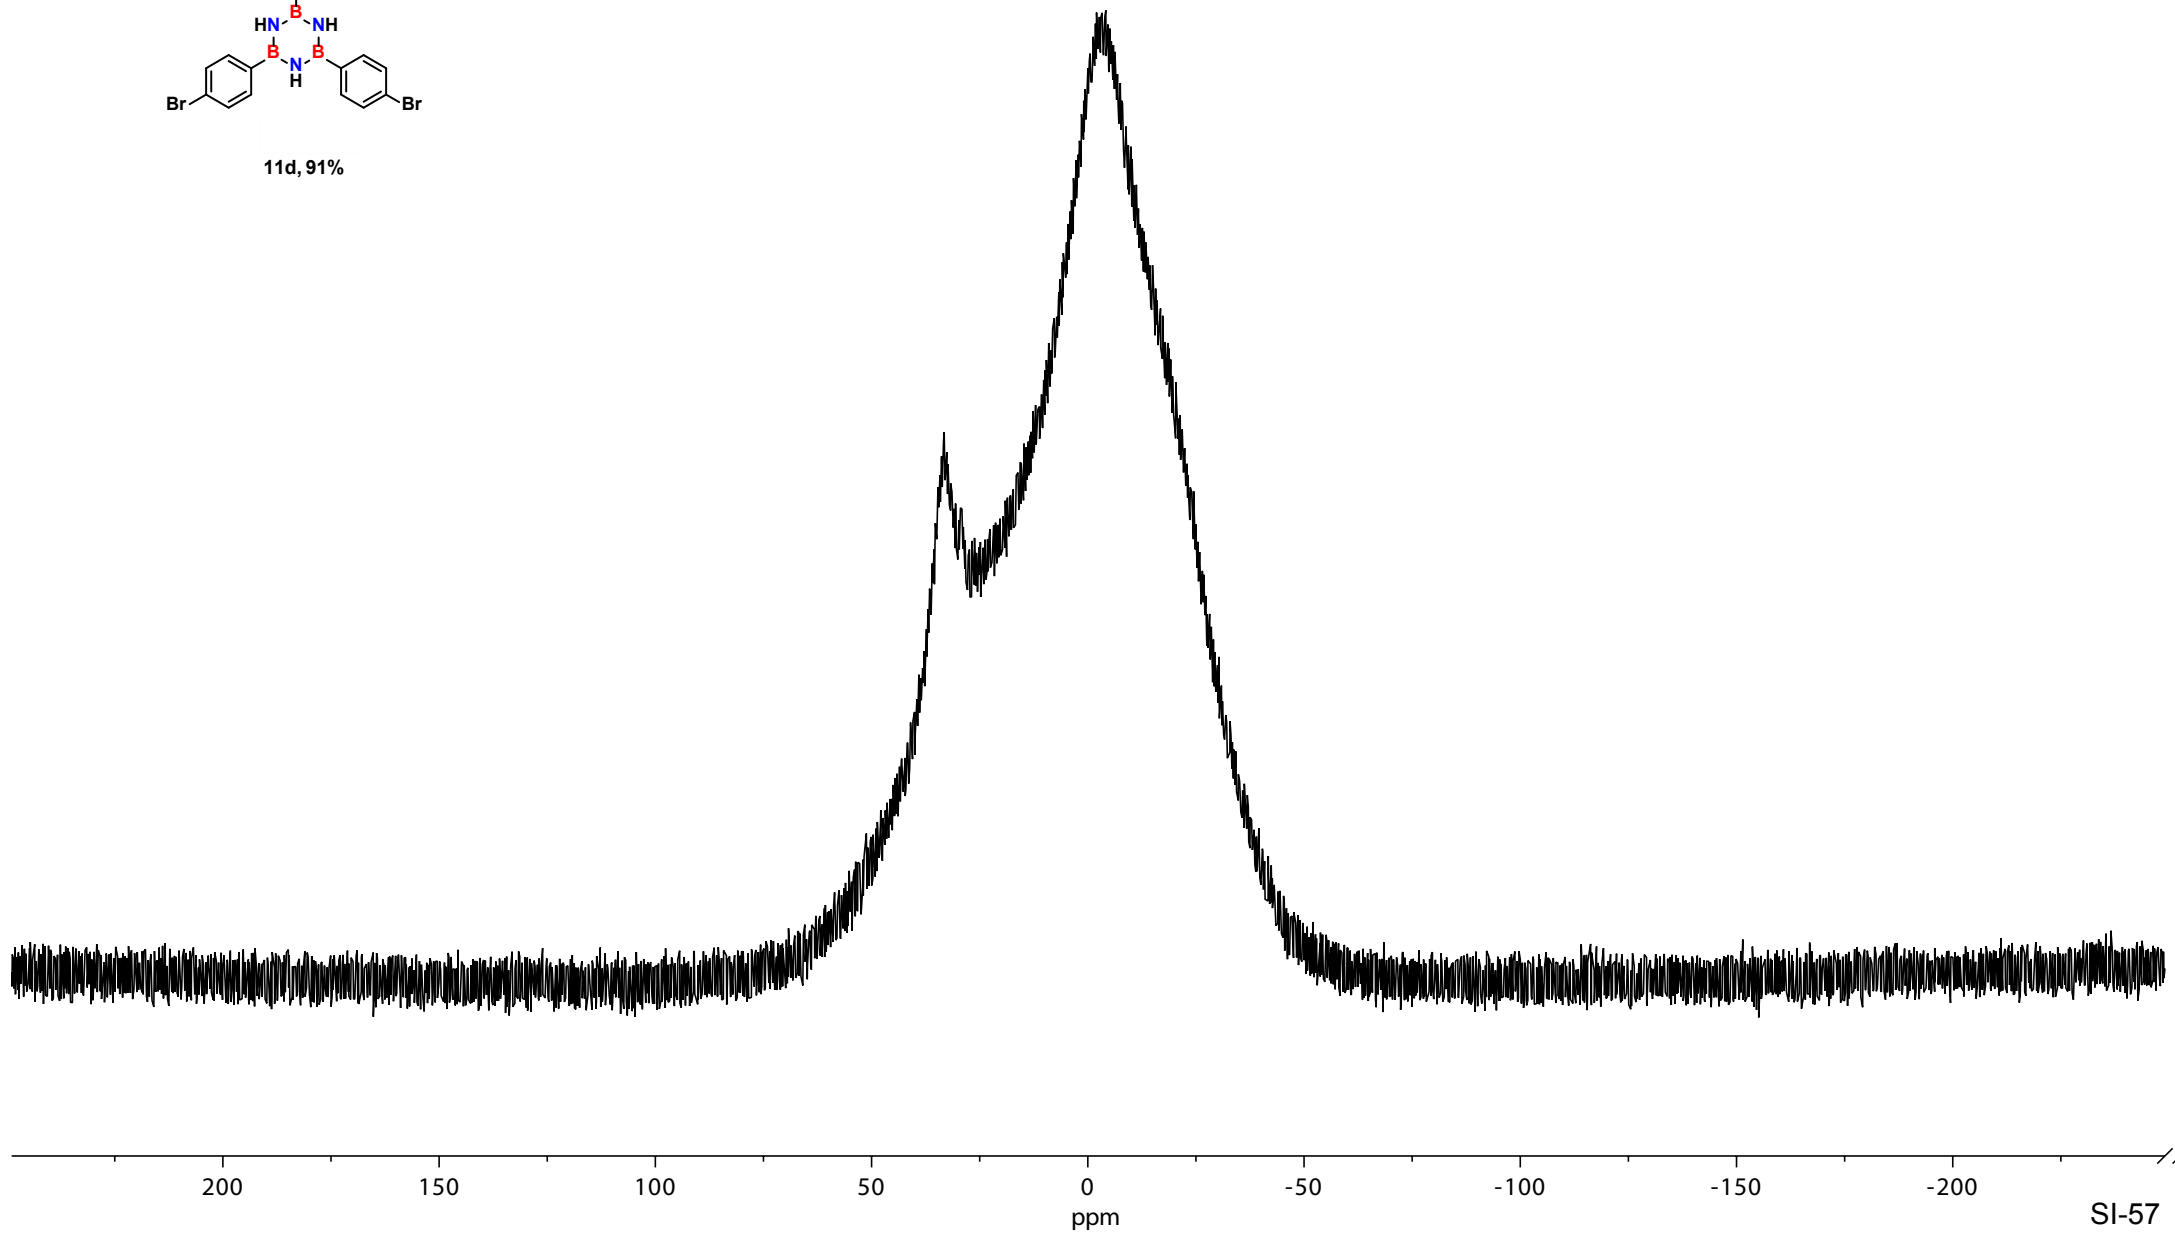

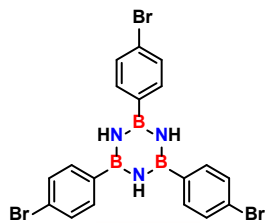

11d, 91%

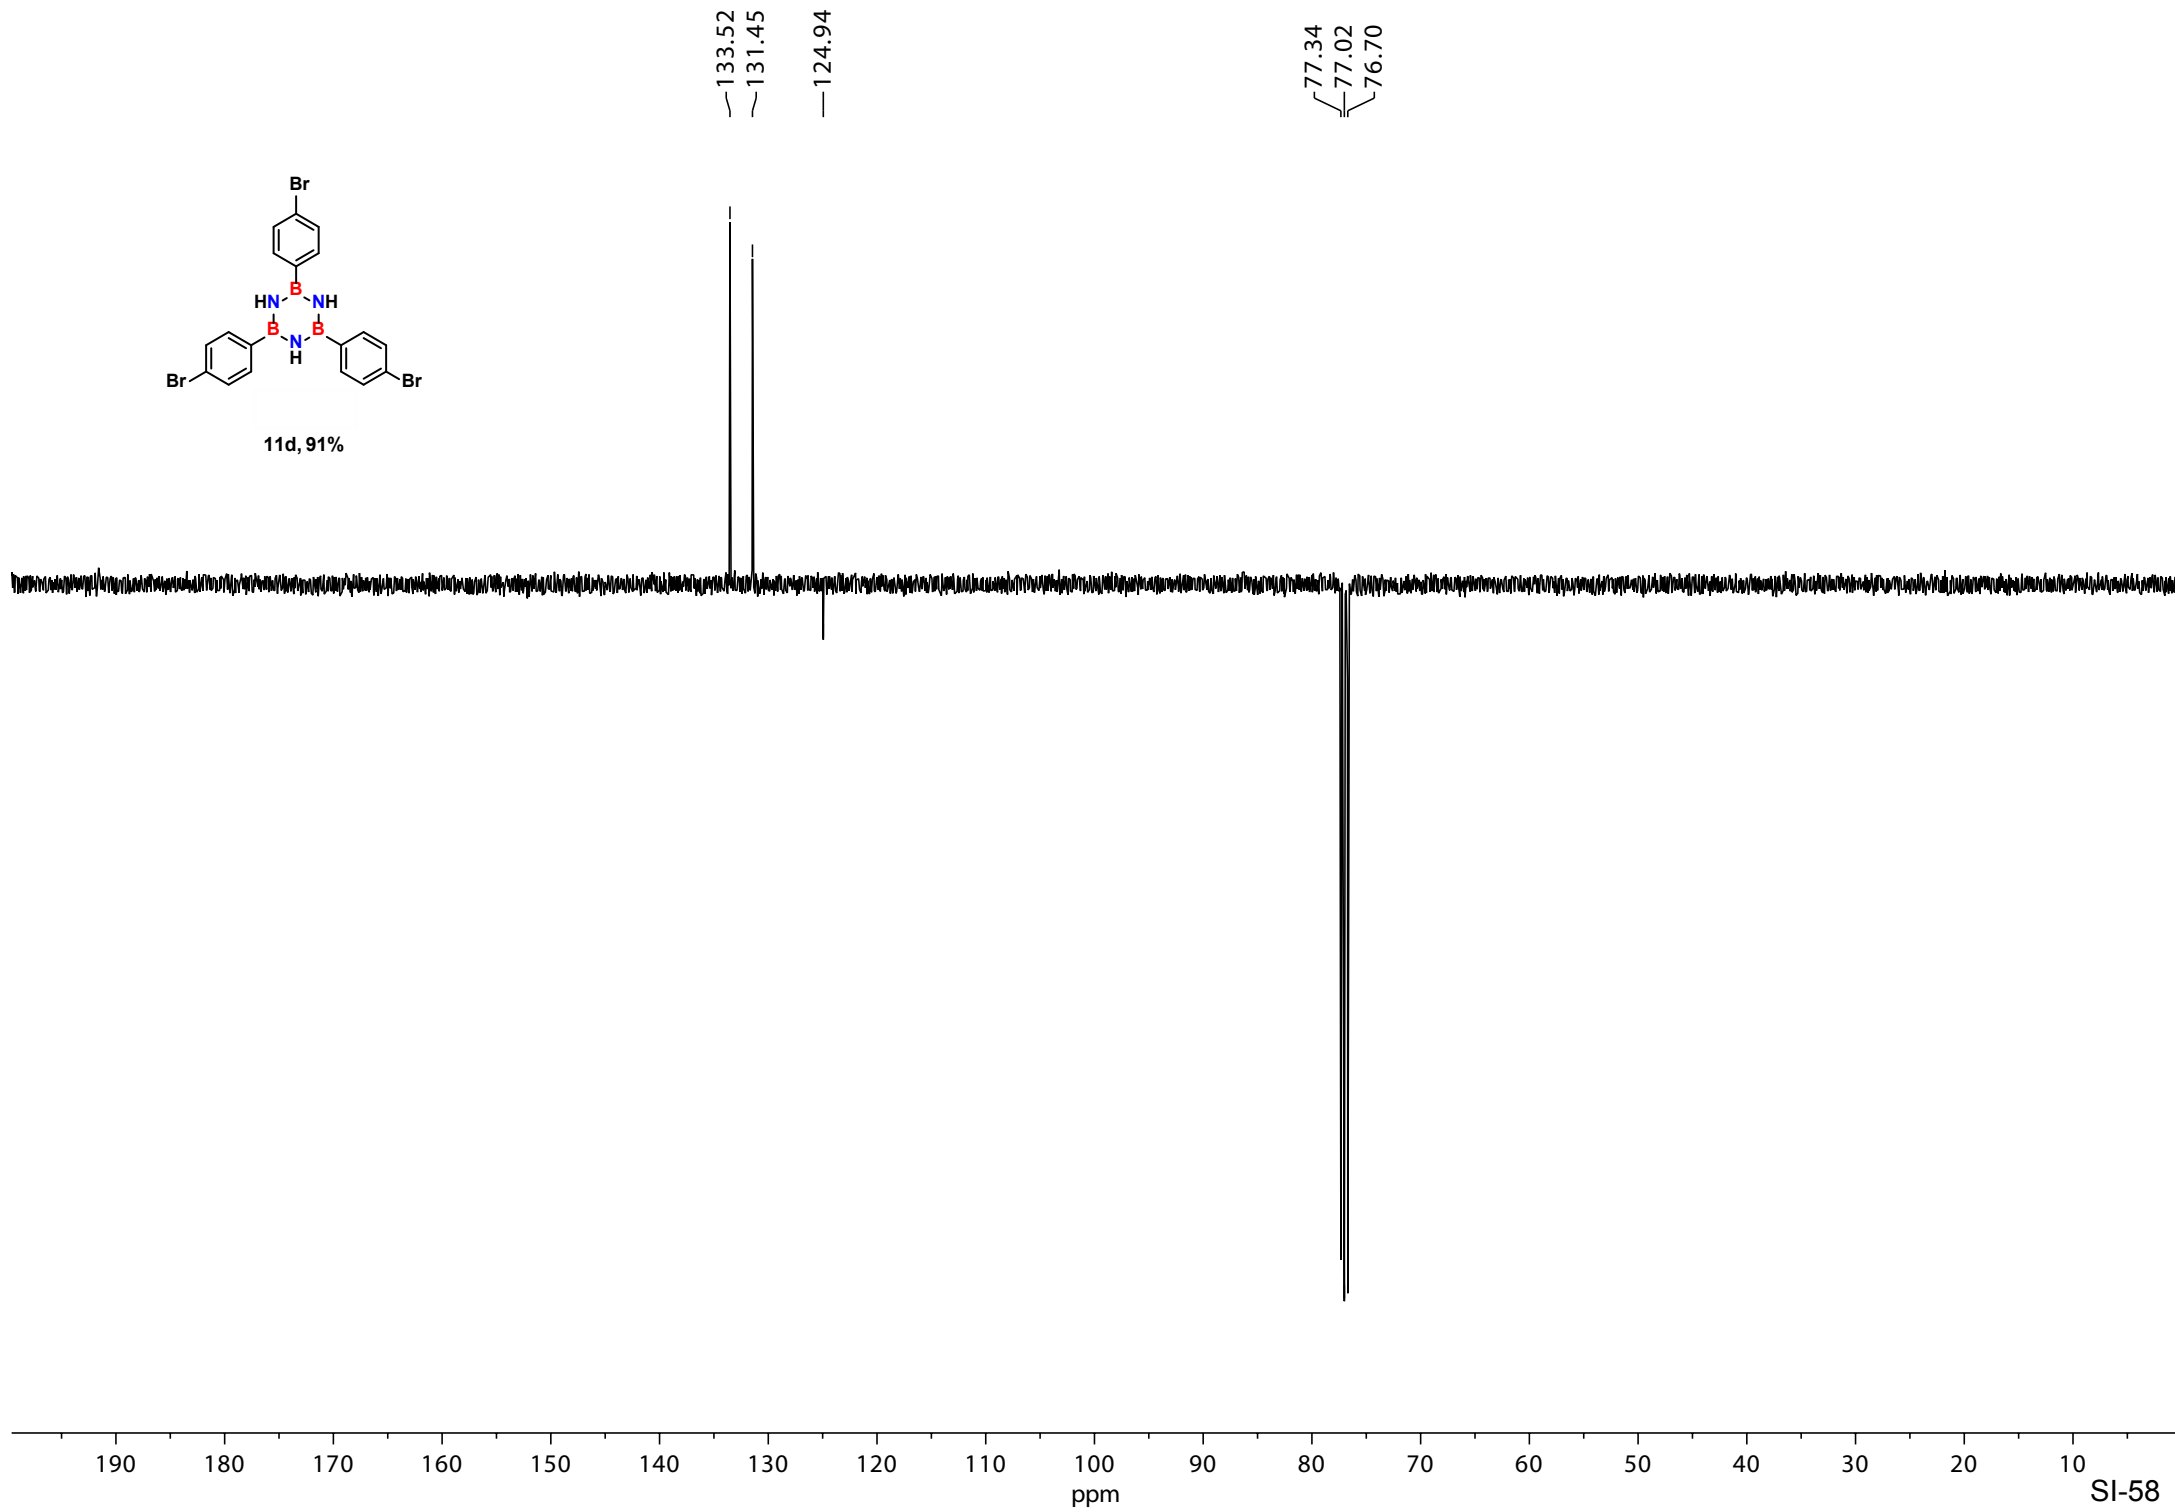

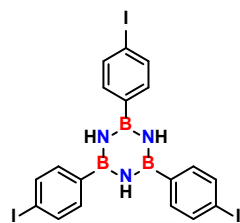

11e, 89%

7.82  
7.80  
7.48  
7.46  
7.26

5.79

1.54

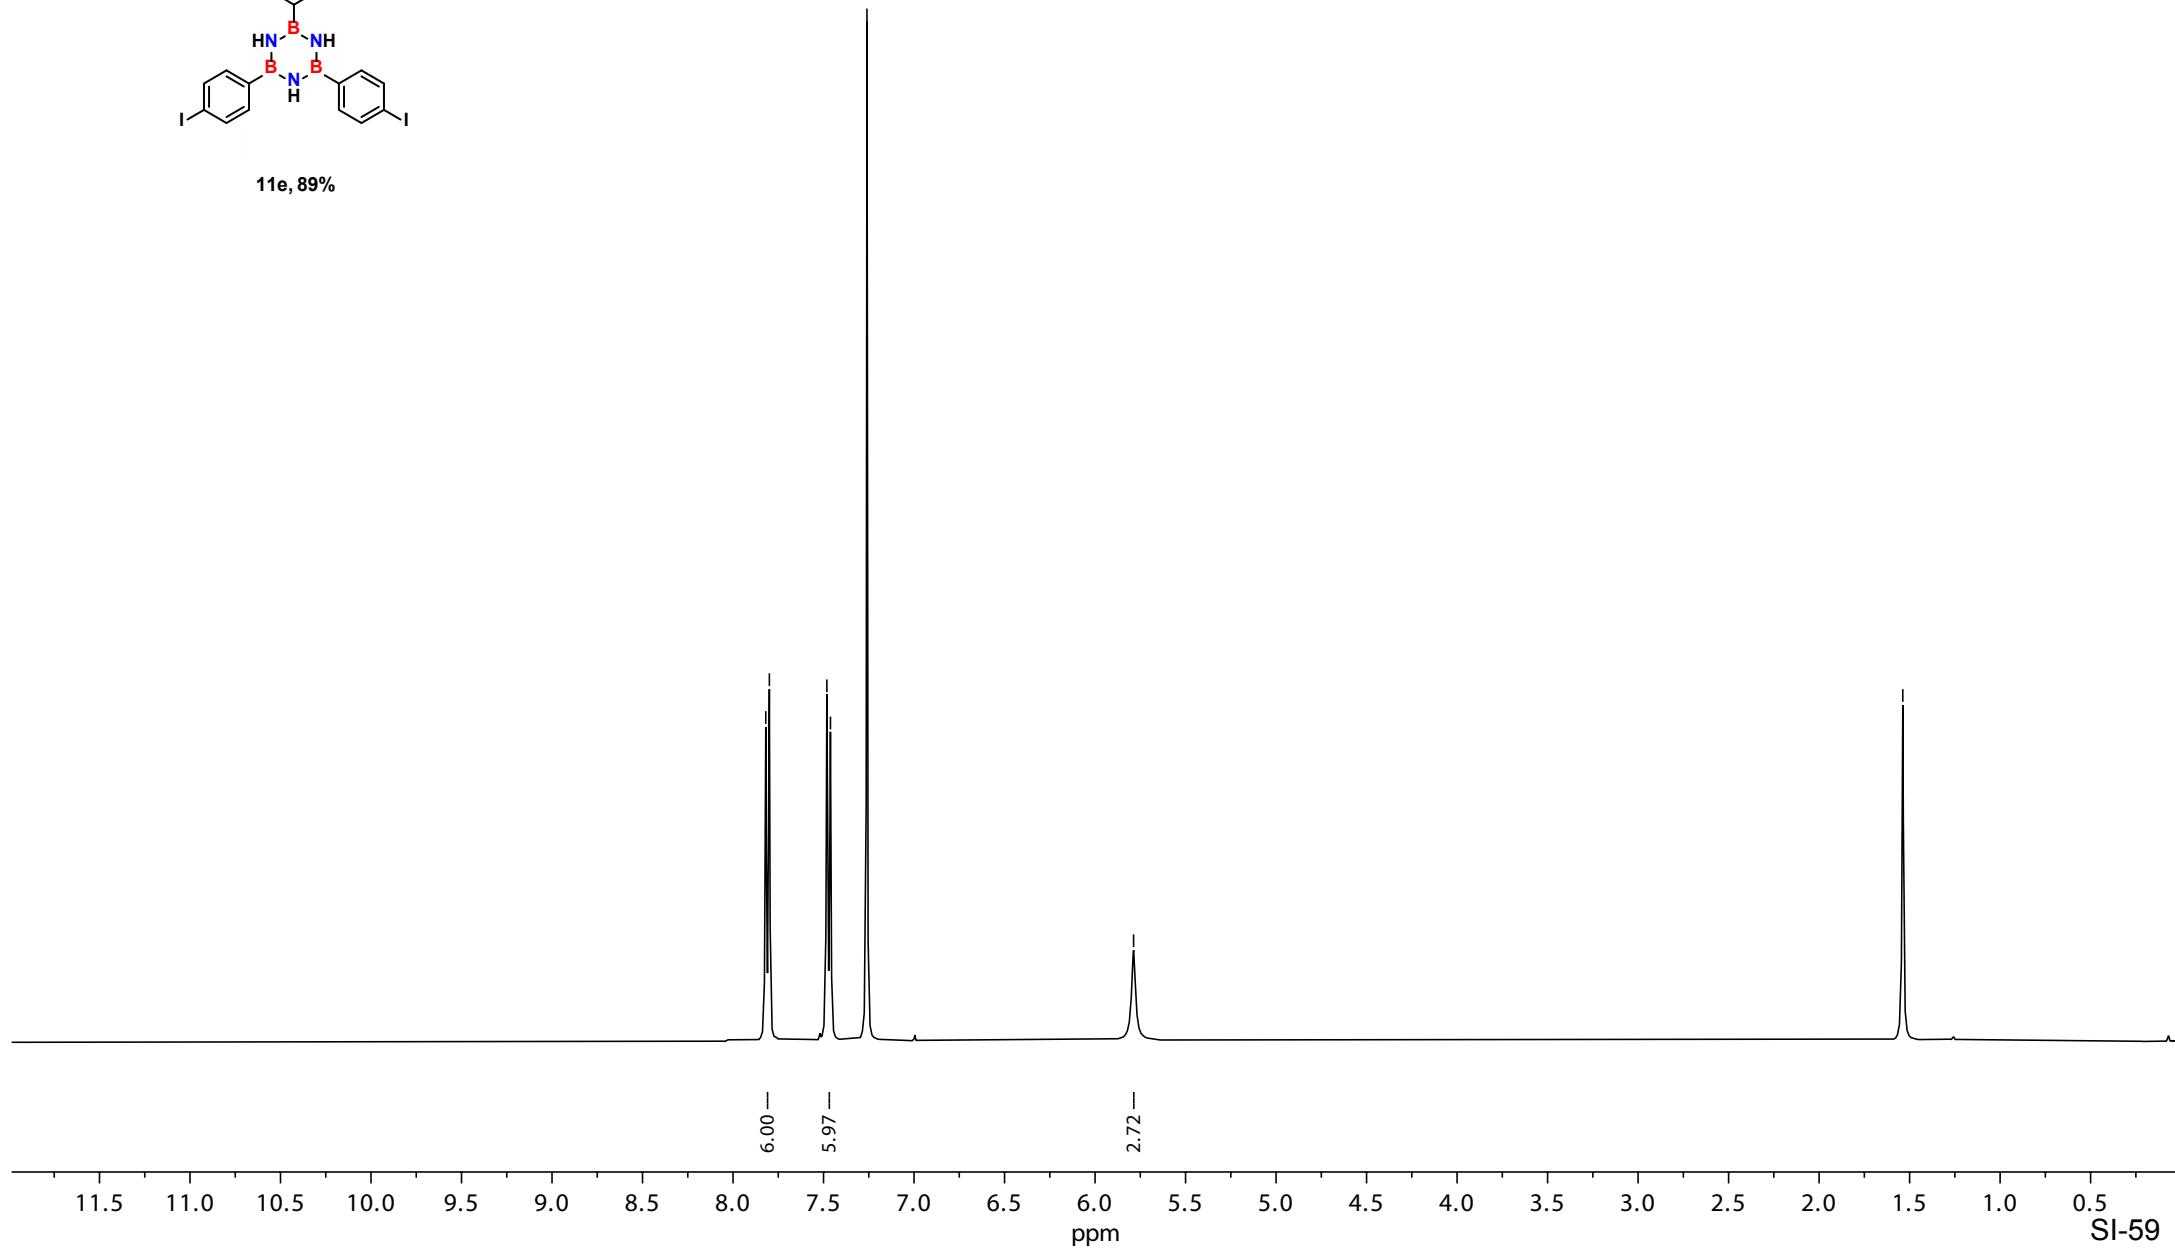

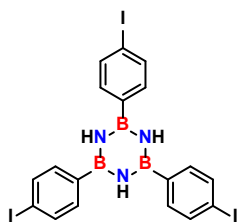

11e, 89%

— 33.22

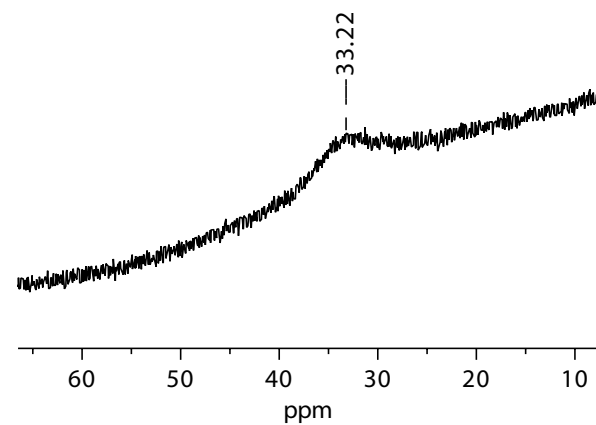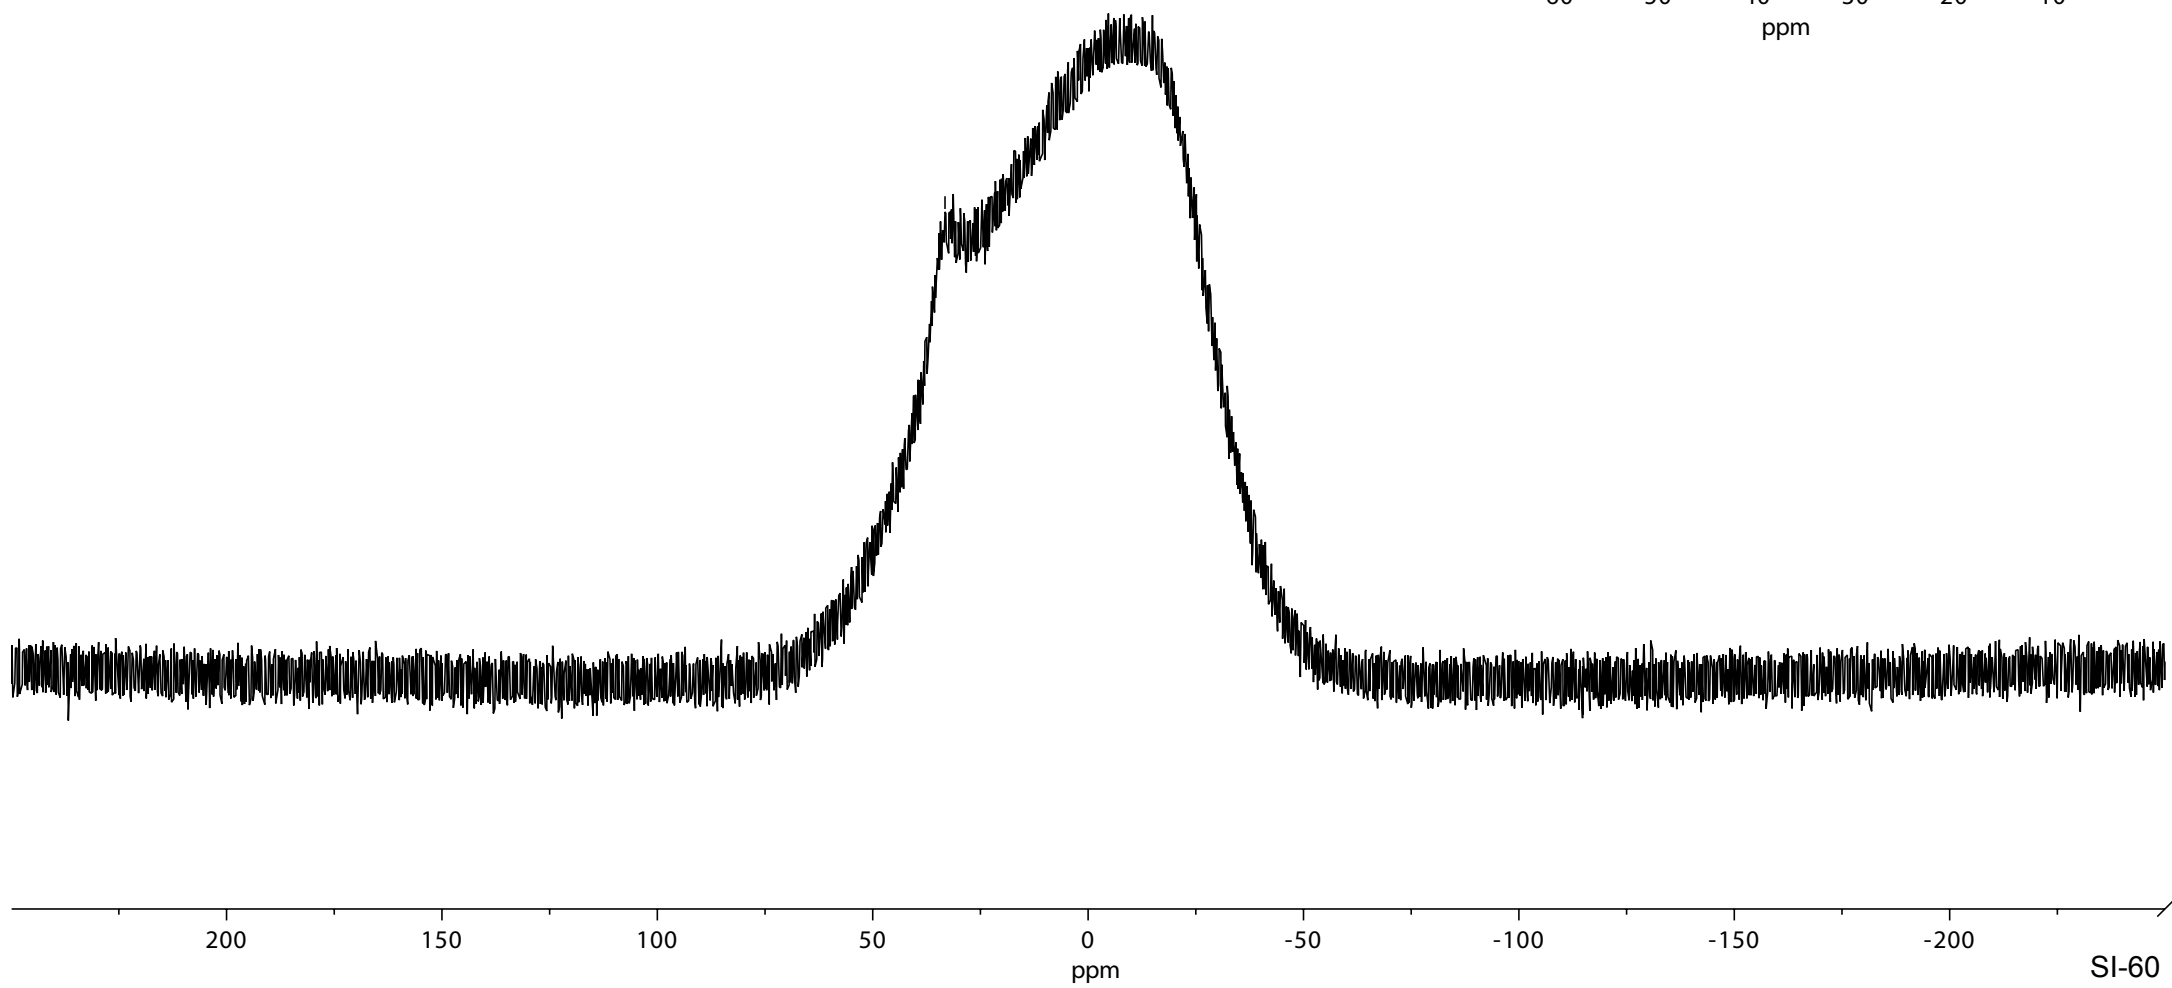

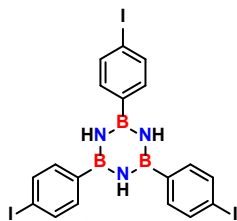

11e, 89%

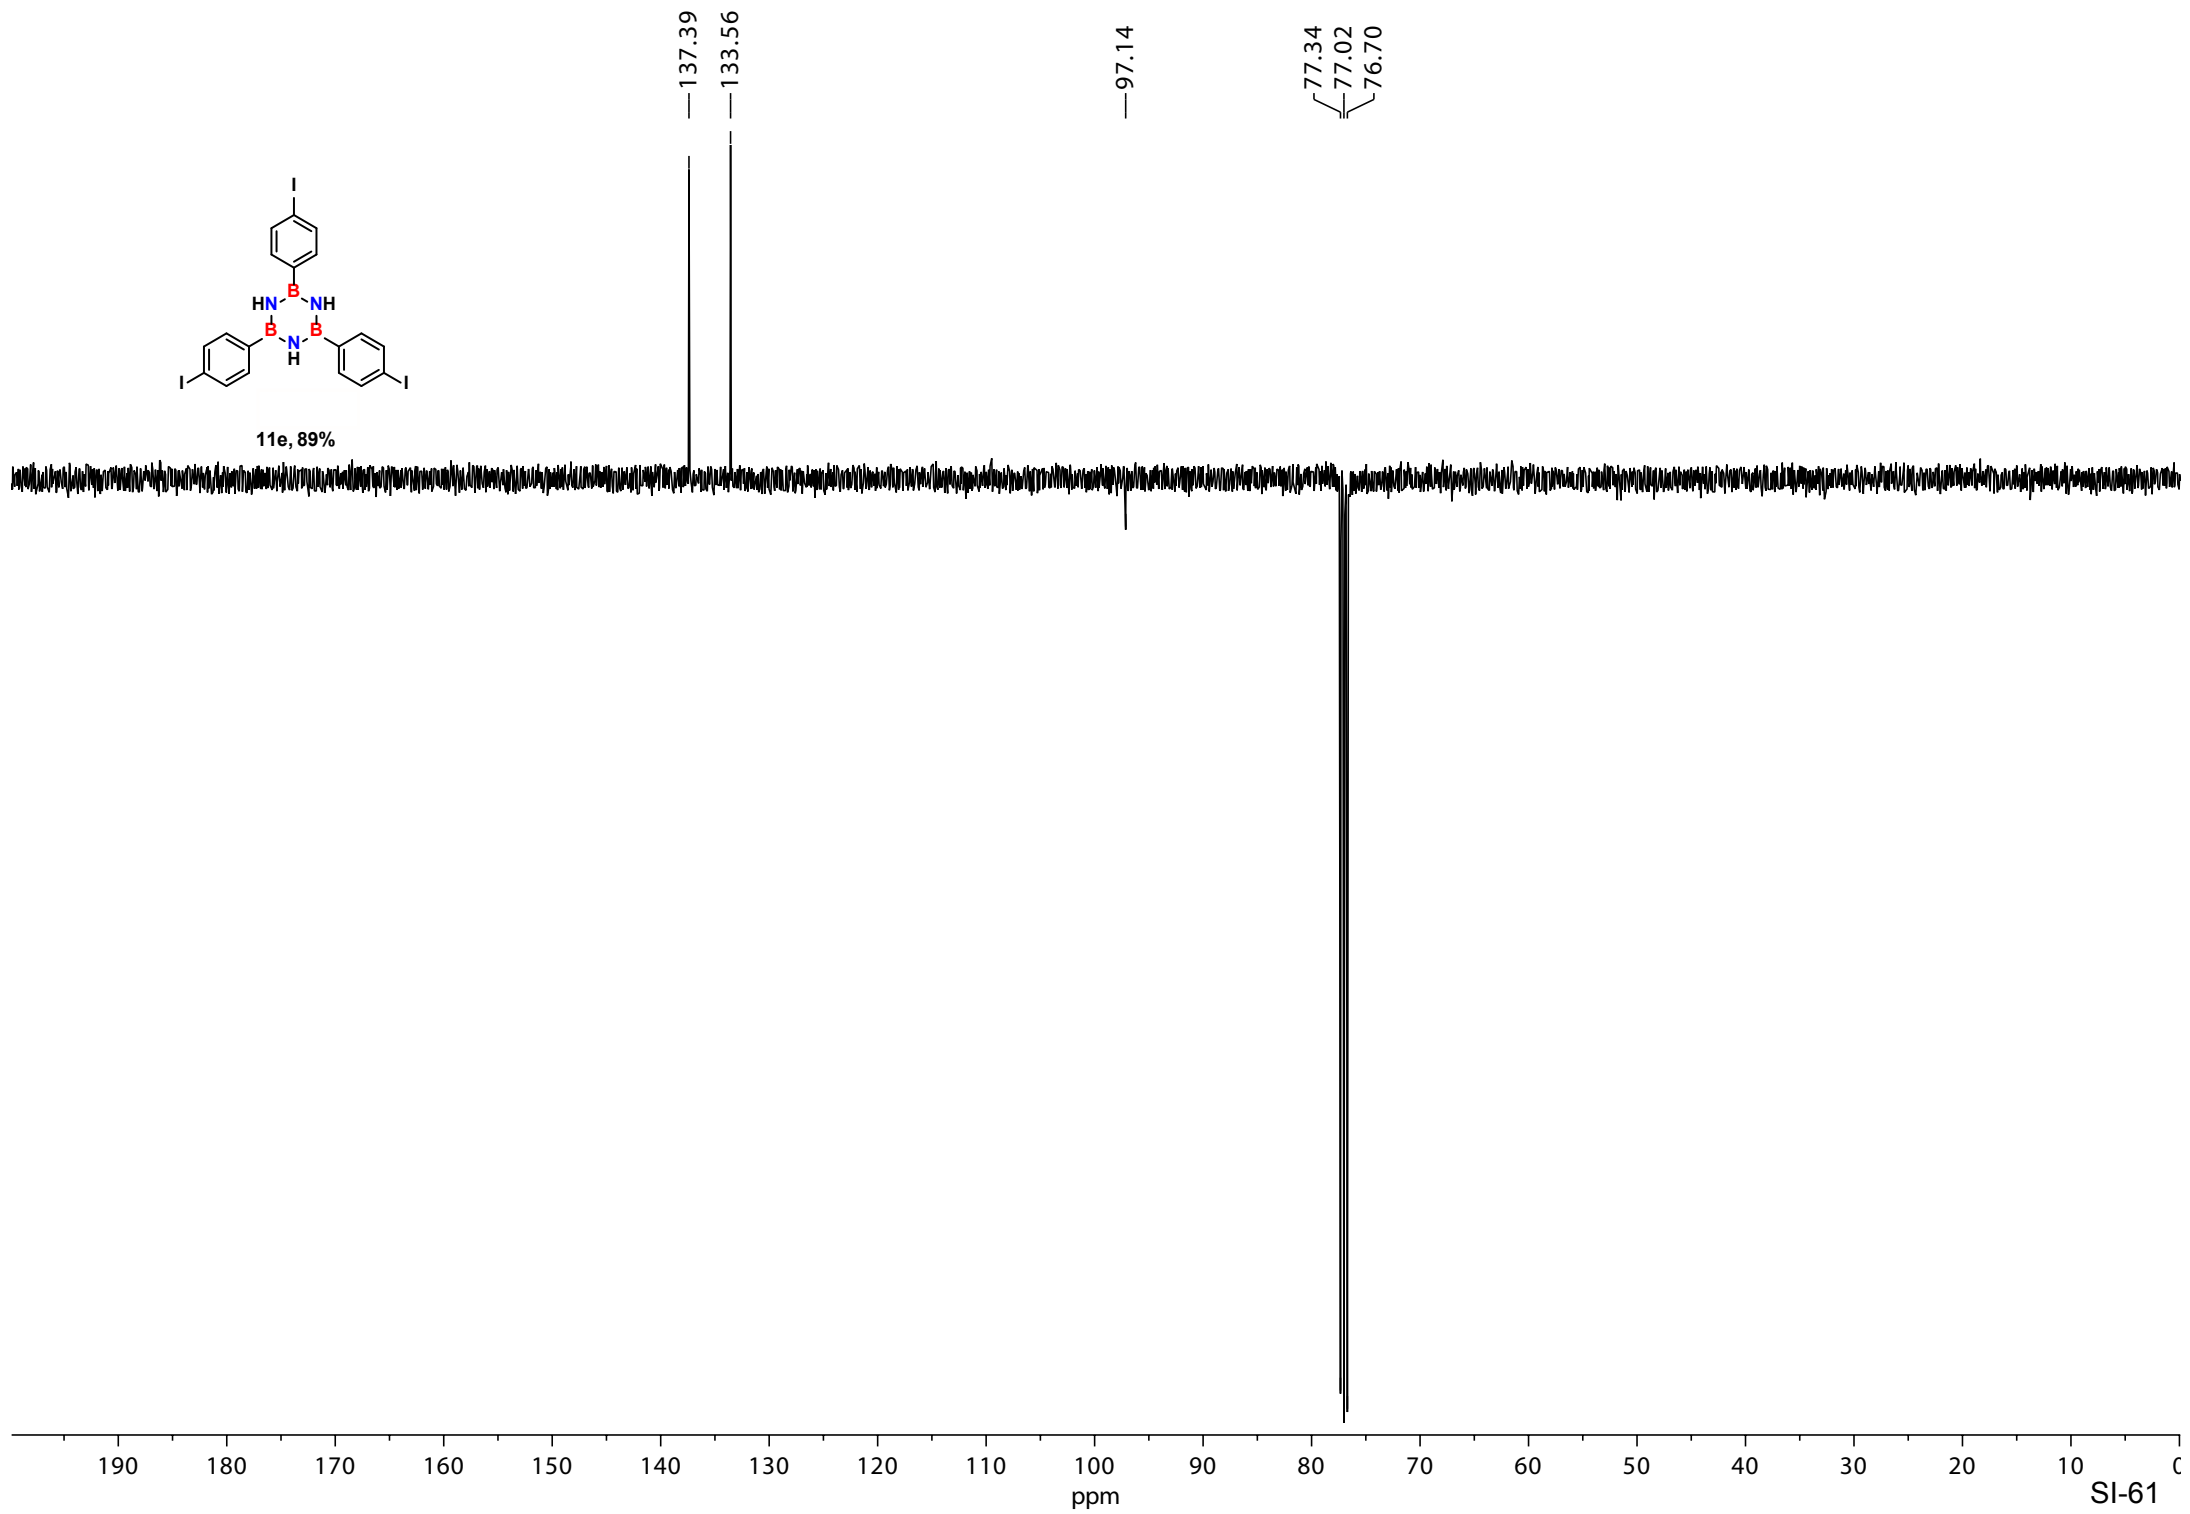

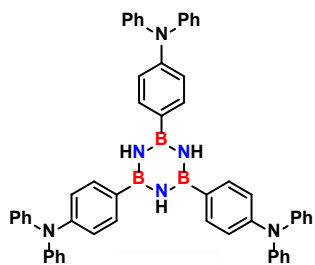

11f, 75%

7.64  
7.62  
7.29  
7.28  
7.26  
7.14  
7.14  
7.13  
7.12  
7.07  
7.05  
7.03

5.75

1.56

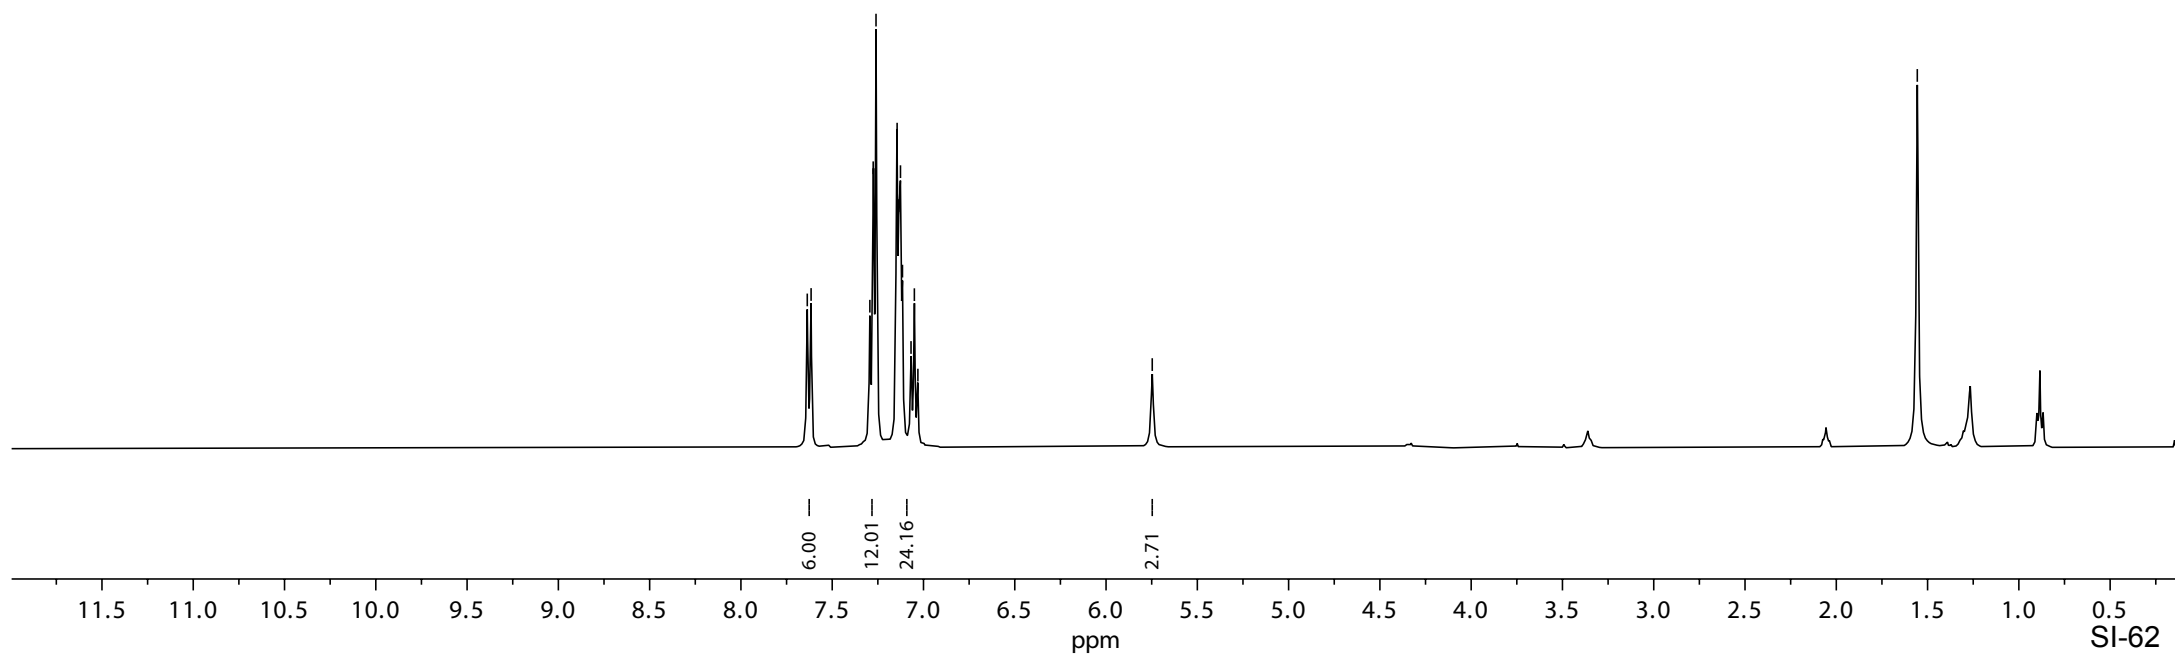

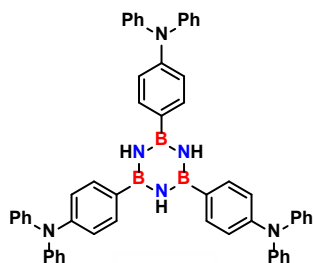

11f, 75%

149.53  
147.51

132.97  
129.32  
124.80  
123.23  
122.55

77.34  
77.02  
76.70

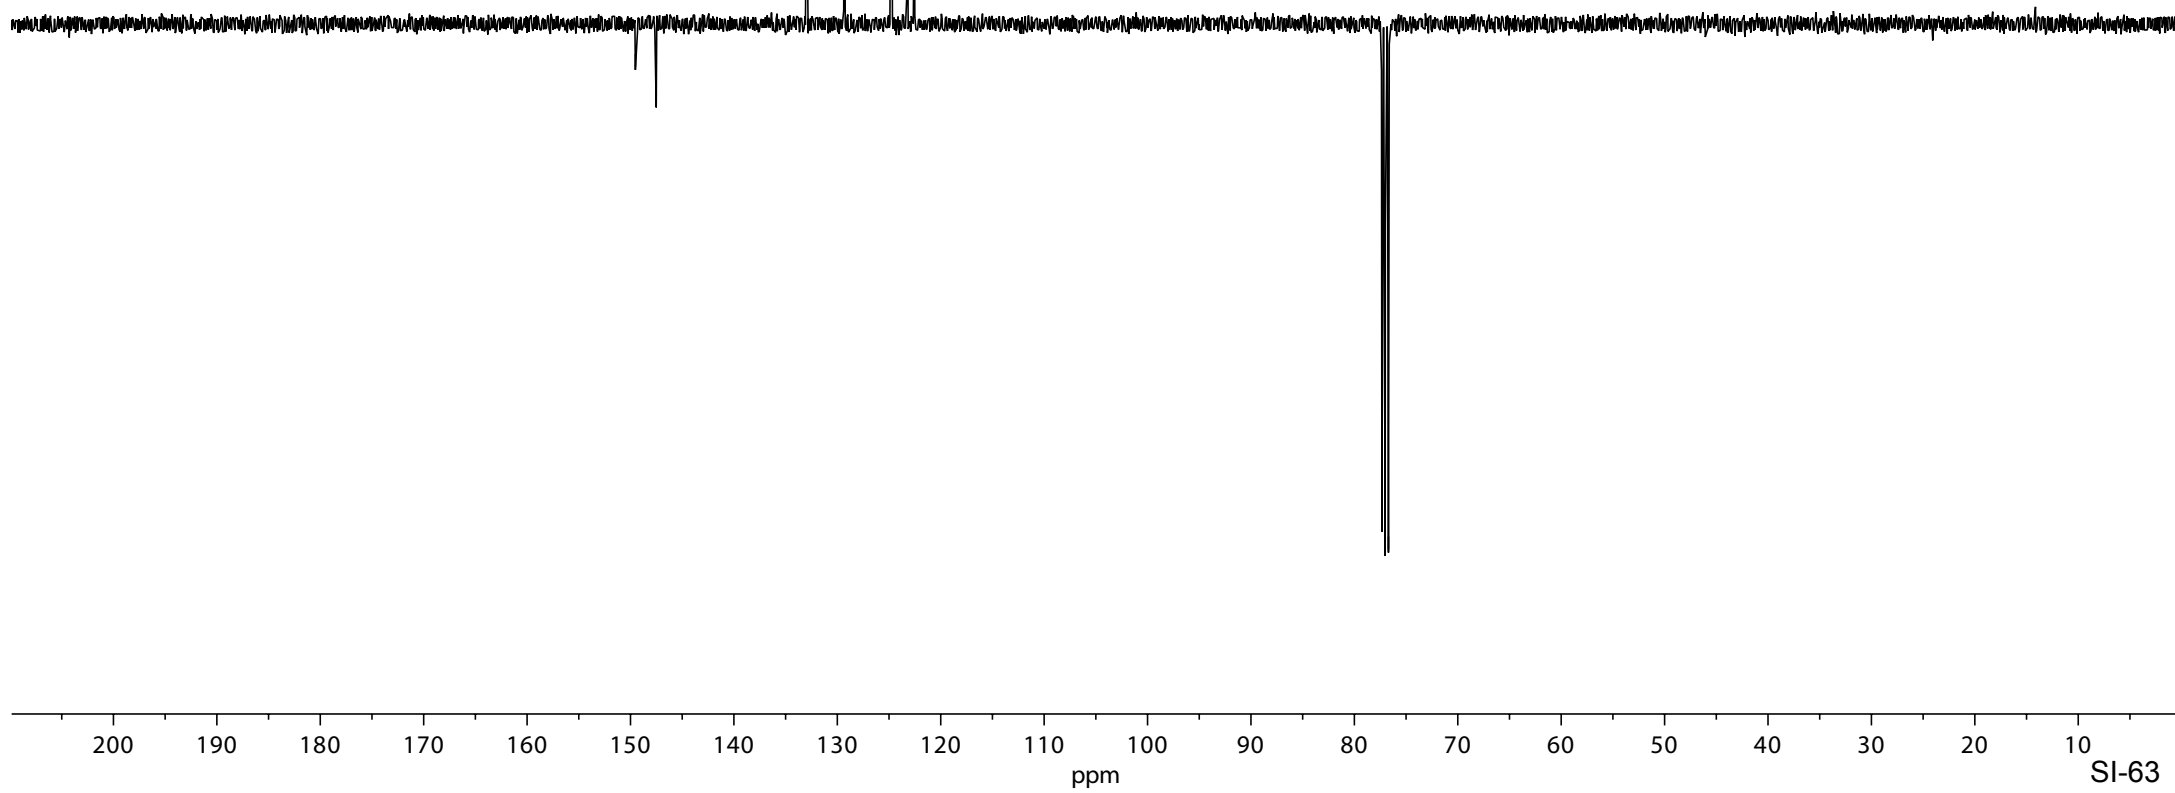

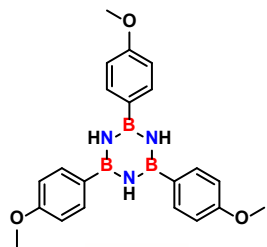

11g, 95%

7.74  
7.72  
7.26  
7.01  
6.99

5.75

3.87

1.55

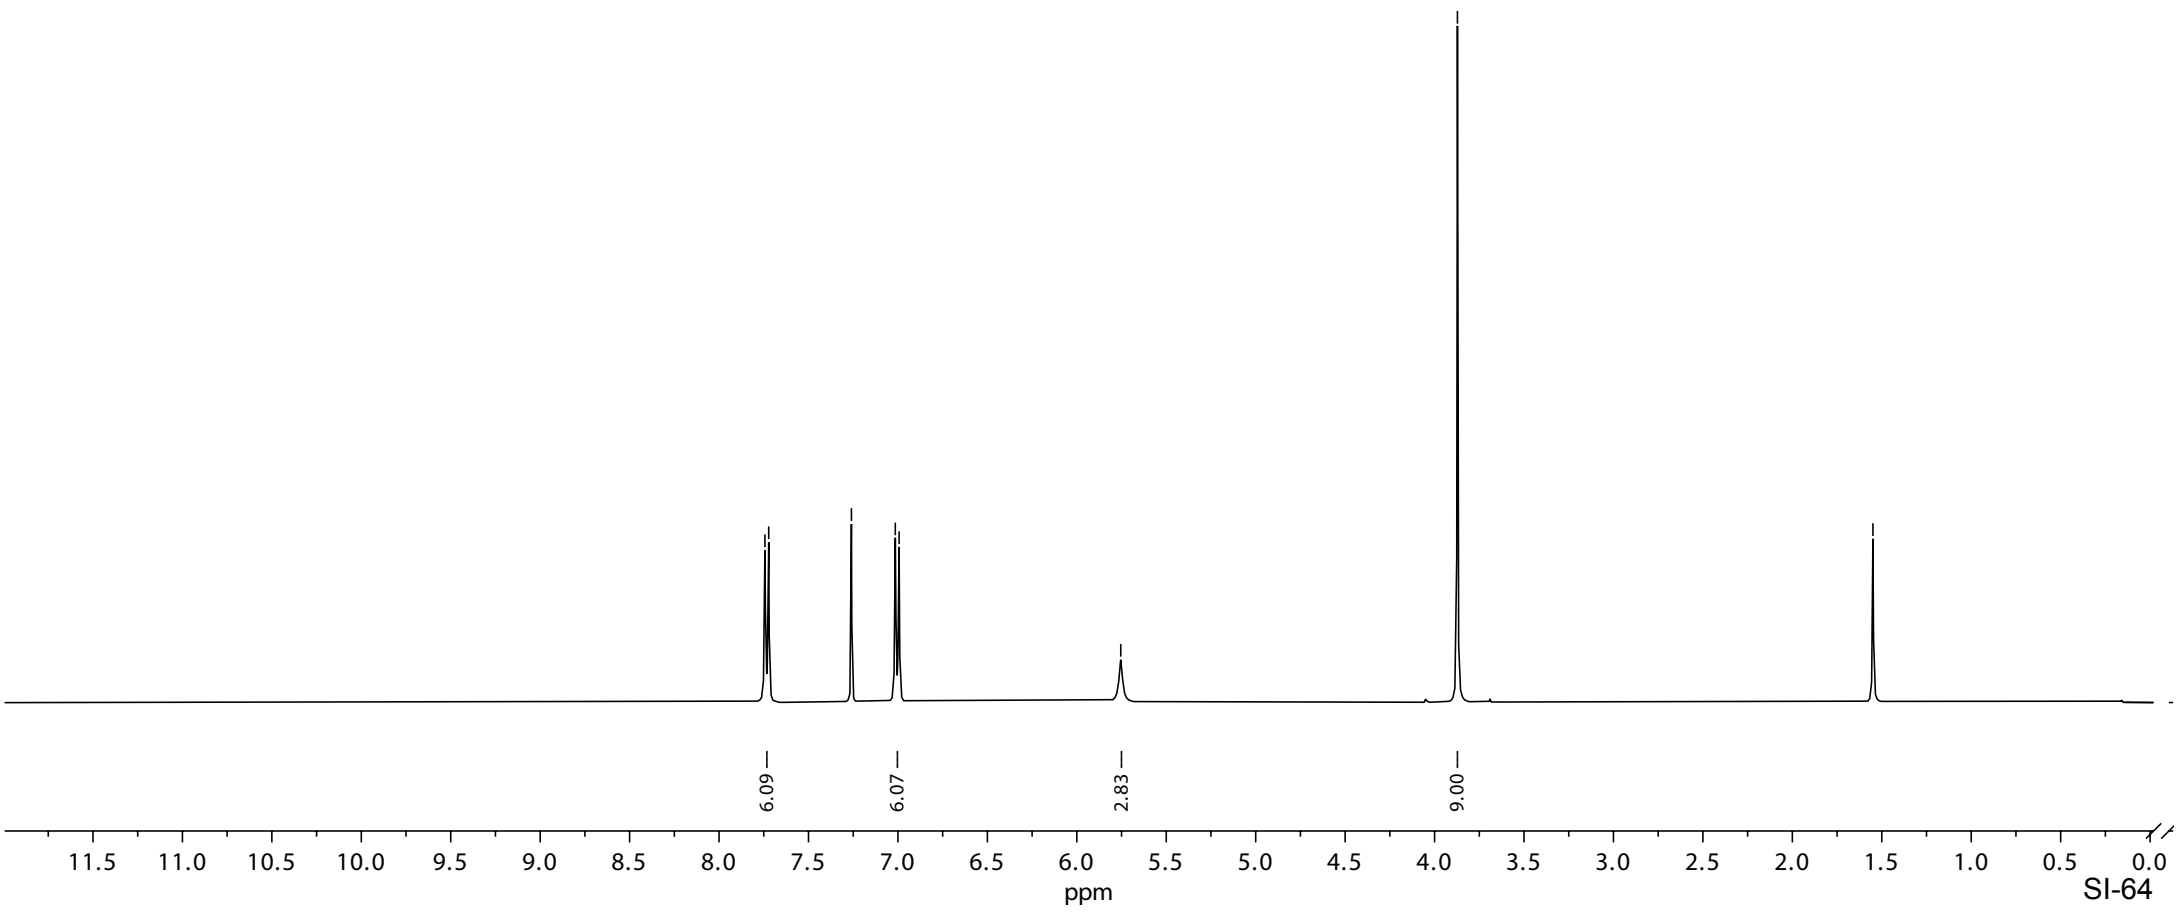

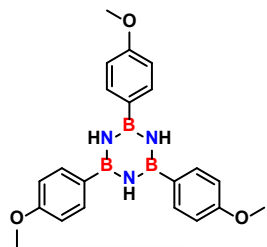

11g, 95%

—33.81

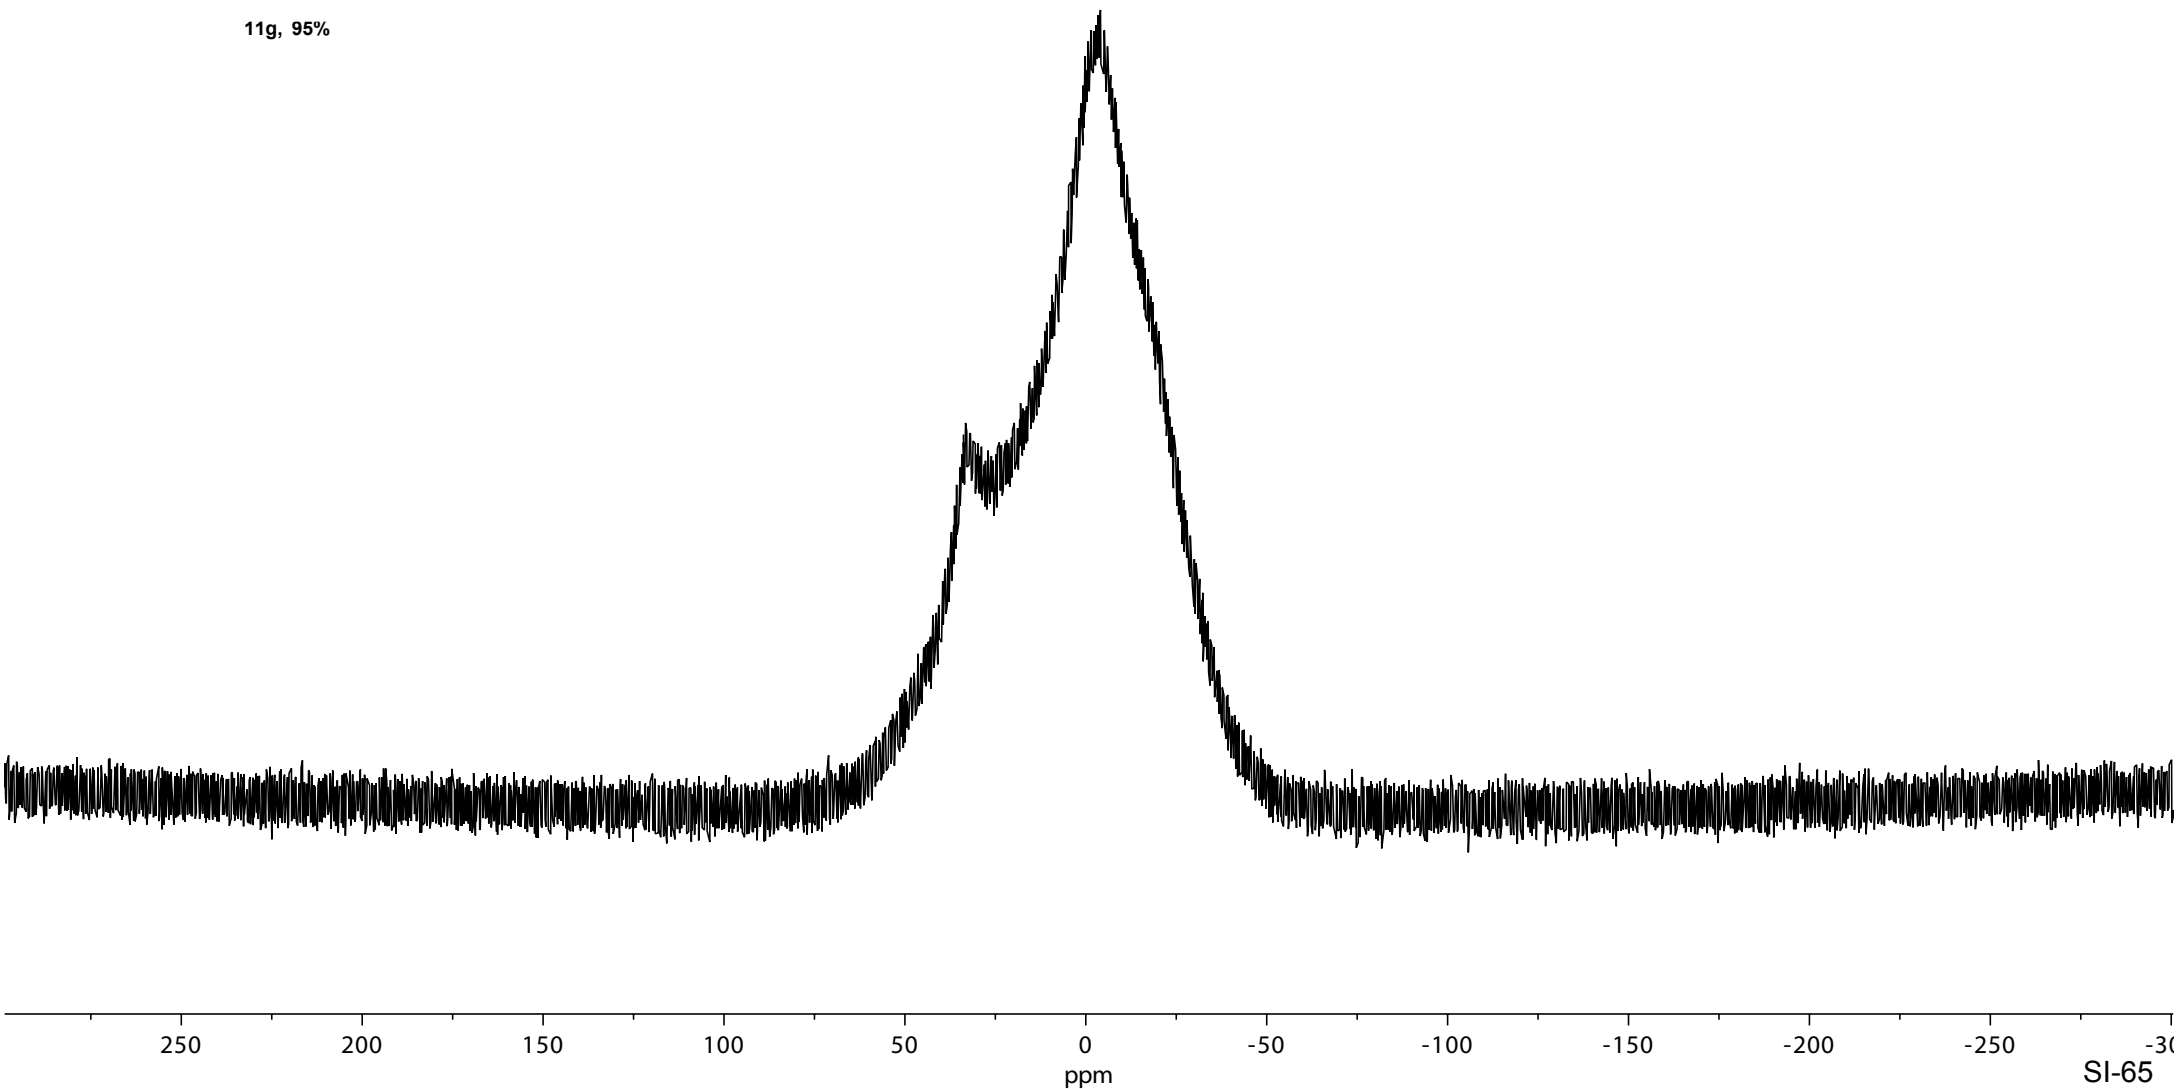

SI-65

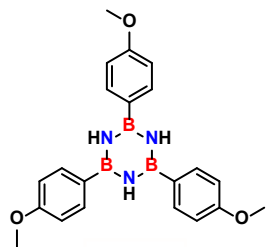

11g, 95%

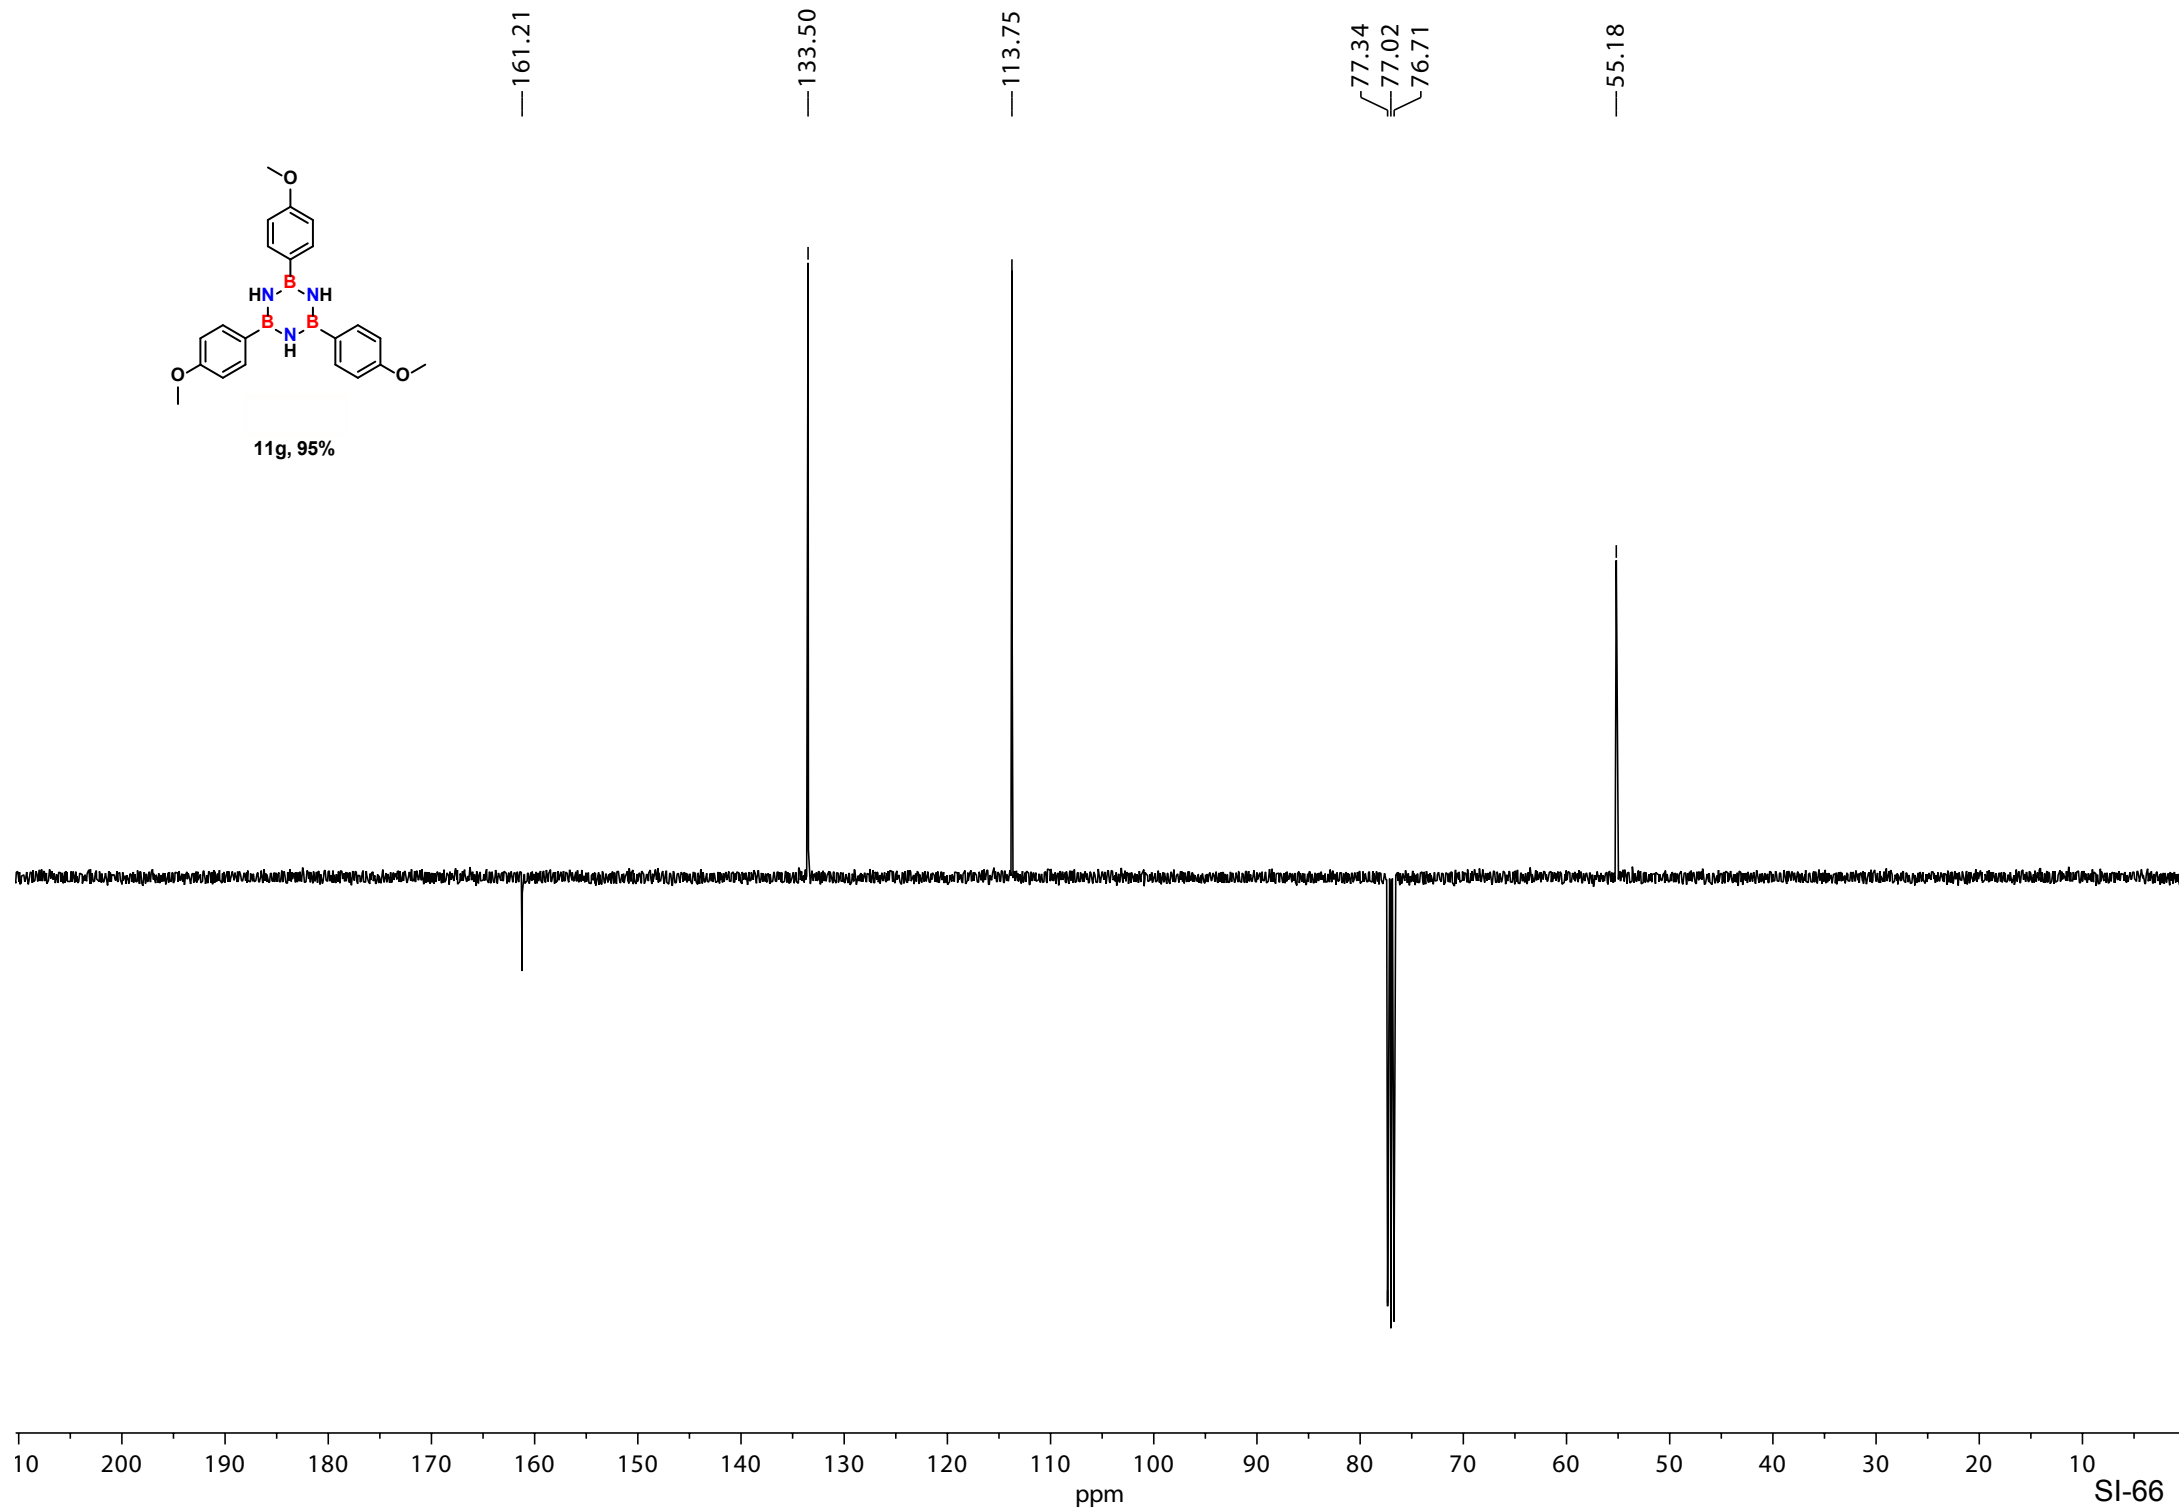

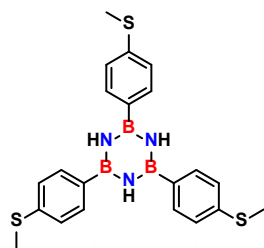

11h, 97%

7.70  
7.67  
7.35  
7.32  
7.26

5.80

2.53

1.55

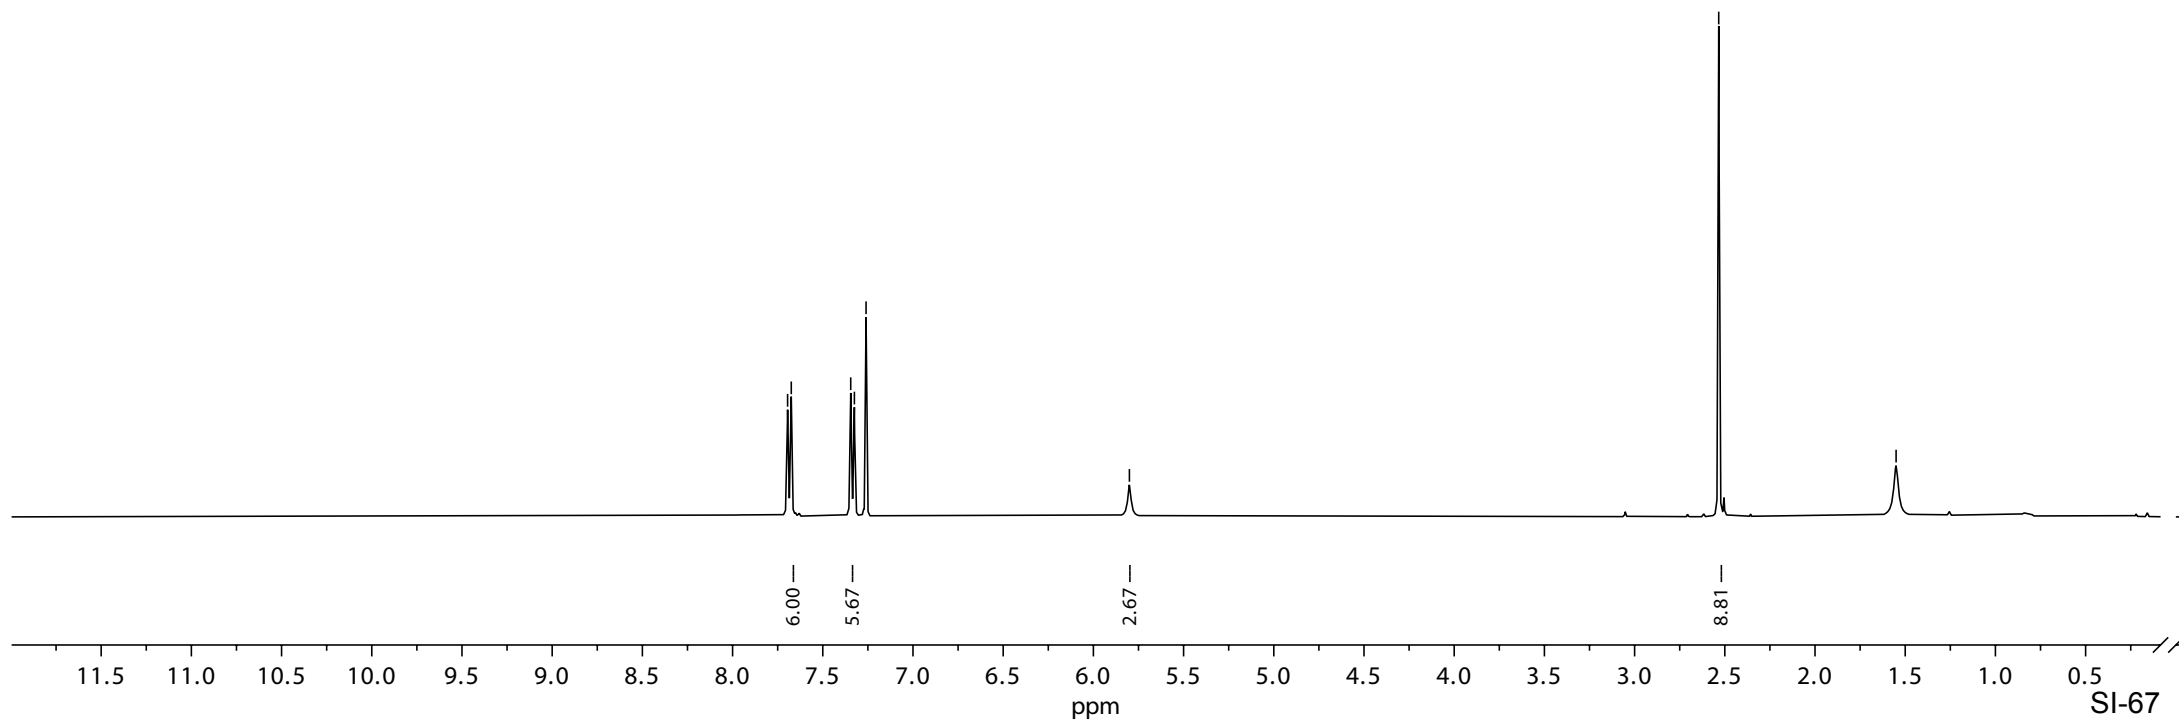

— 33.26

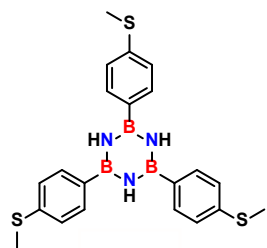

11h, 97%

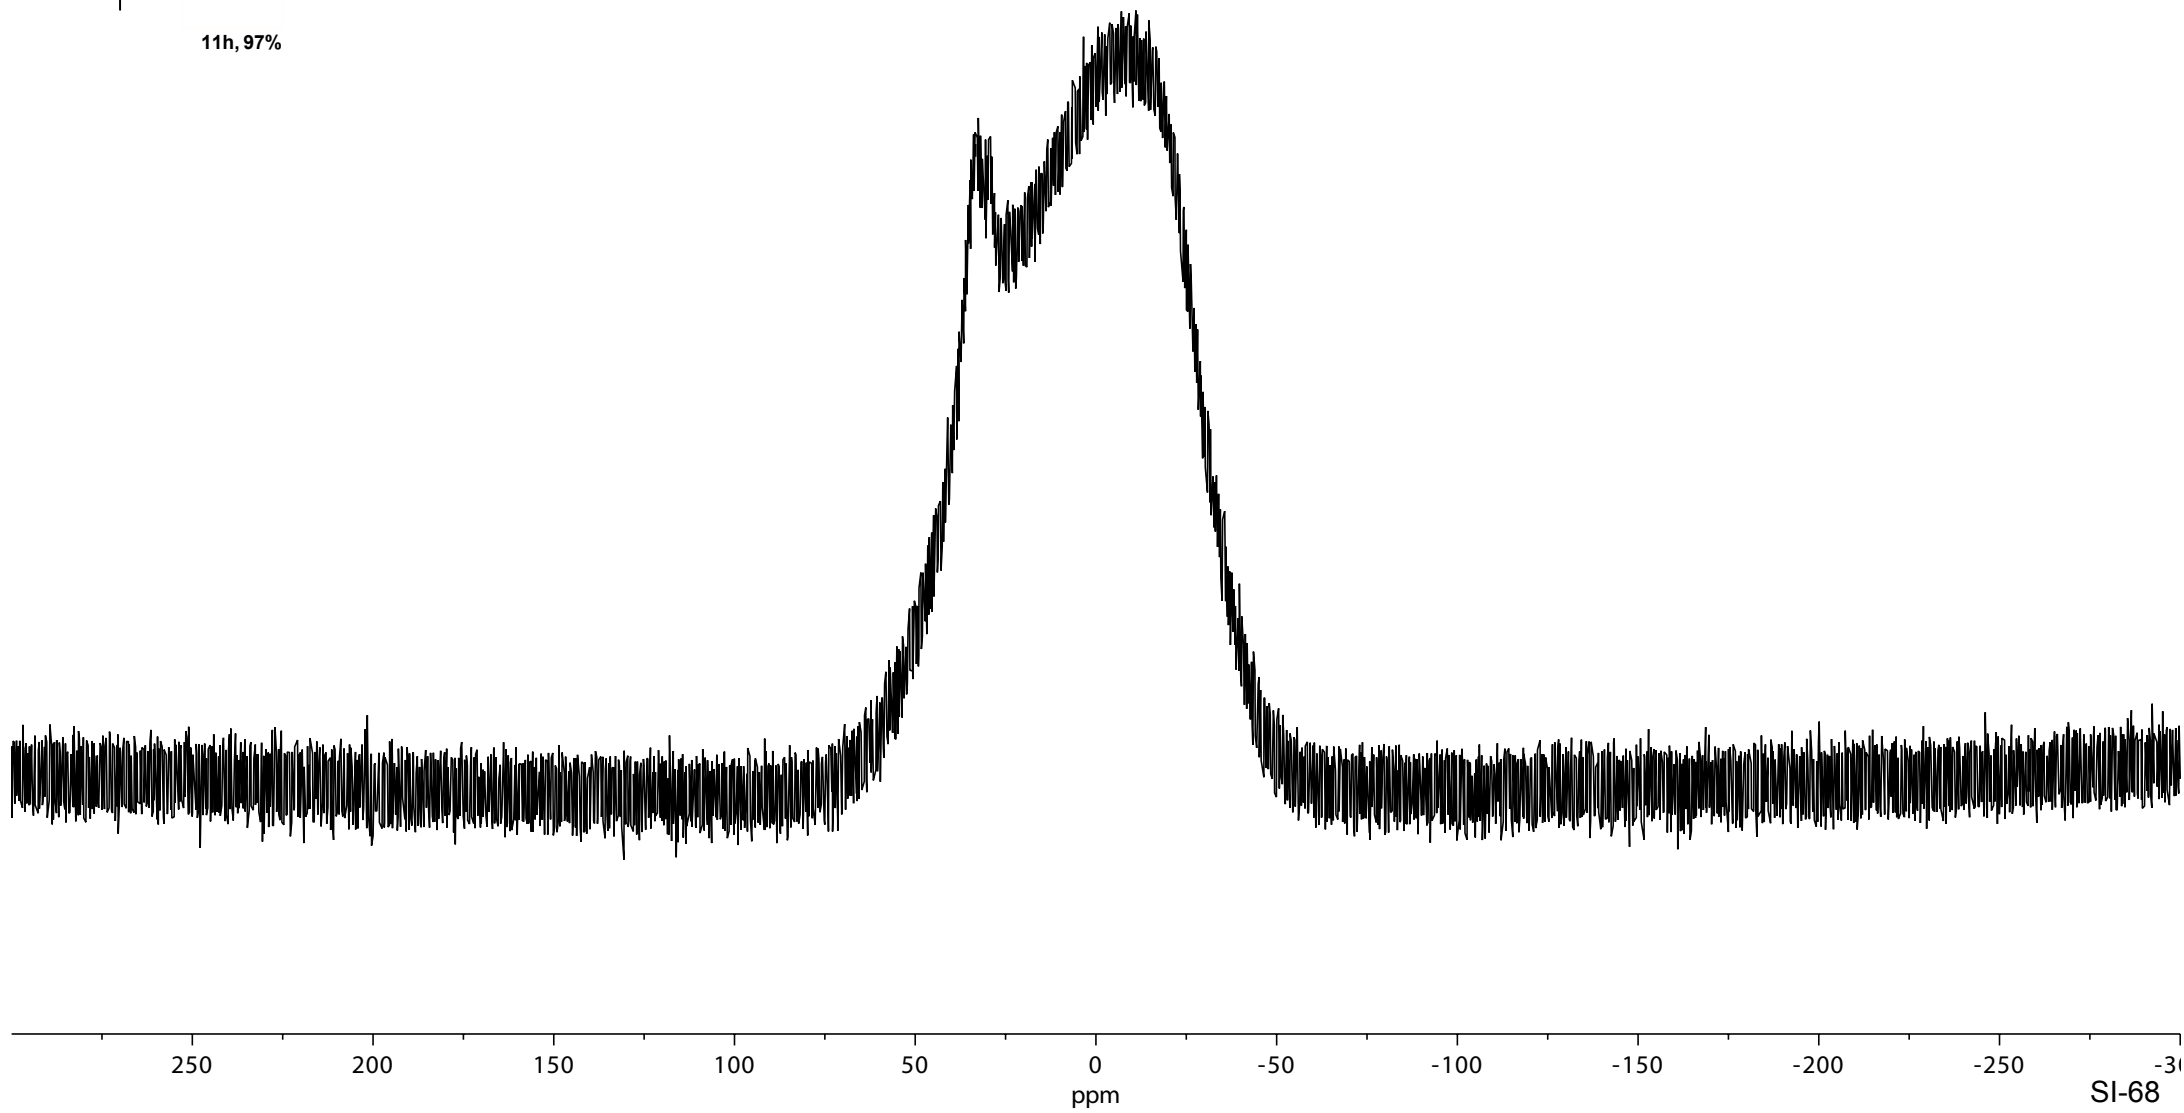

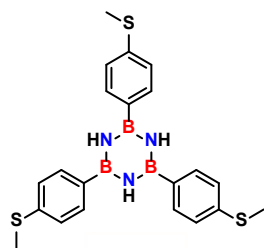

11h, 97%

— 141.03

— 132.37

— 125.80

77.34  
77.02  
76.70

— 15.34

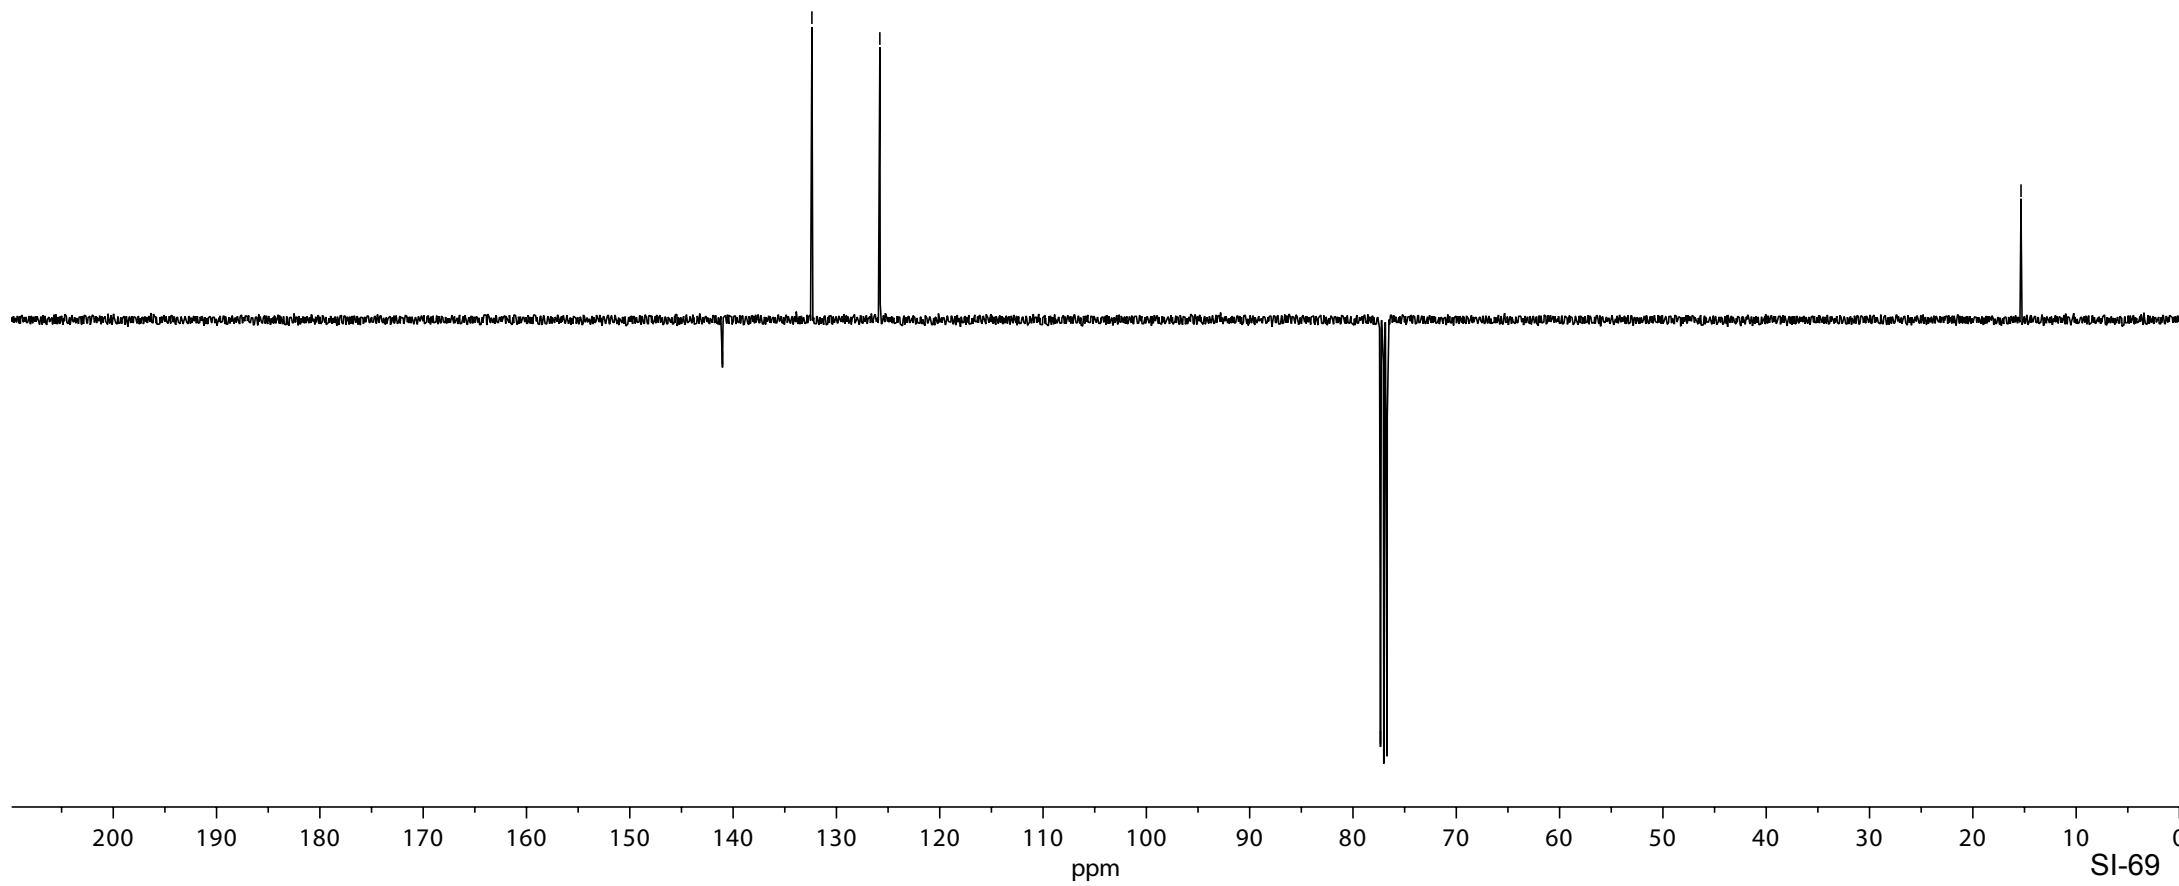

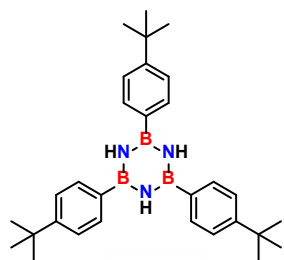

11i, 89%

7.73  
7.71  
7.51  
7.49  
7.26

5.85

1.54  
1.37

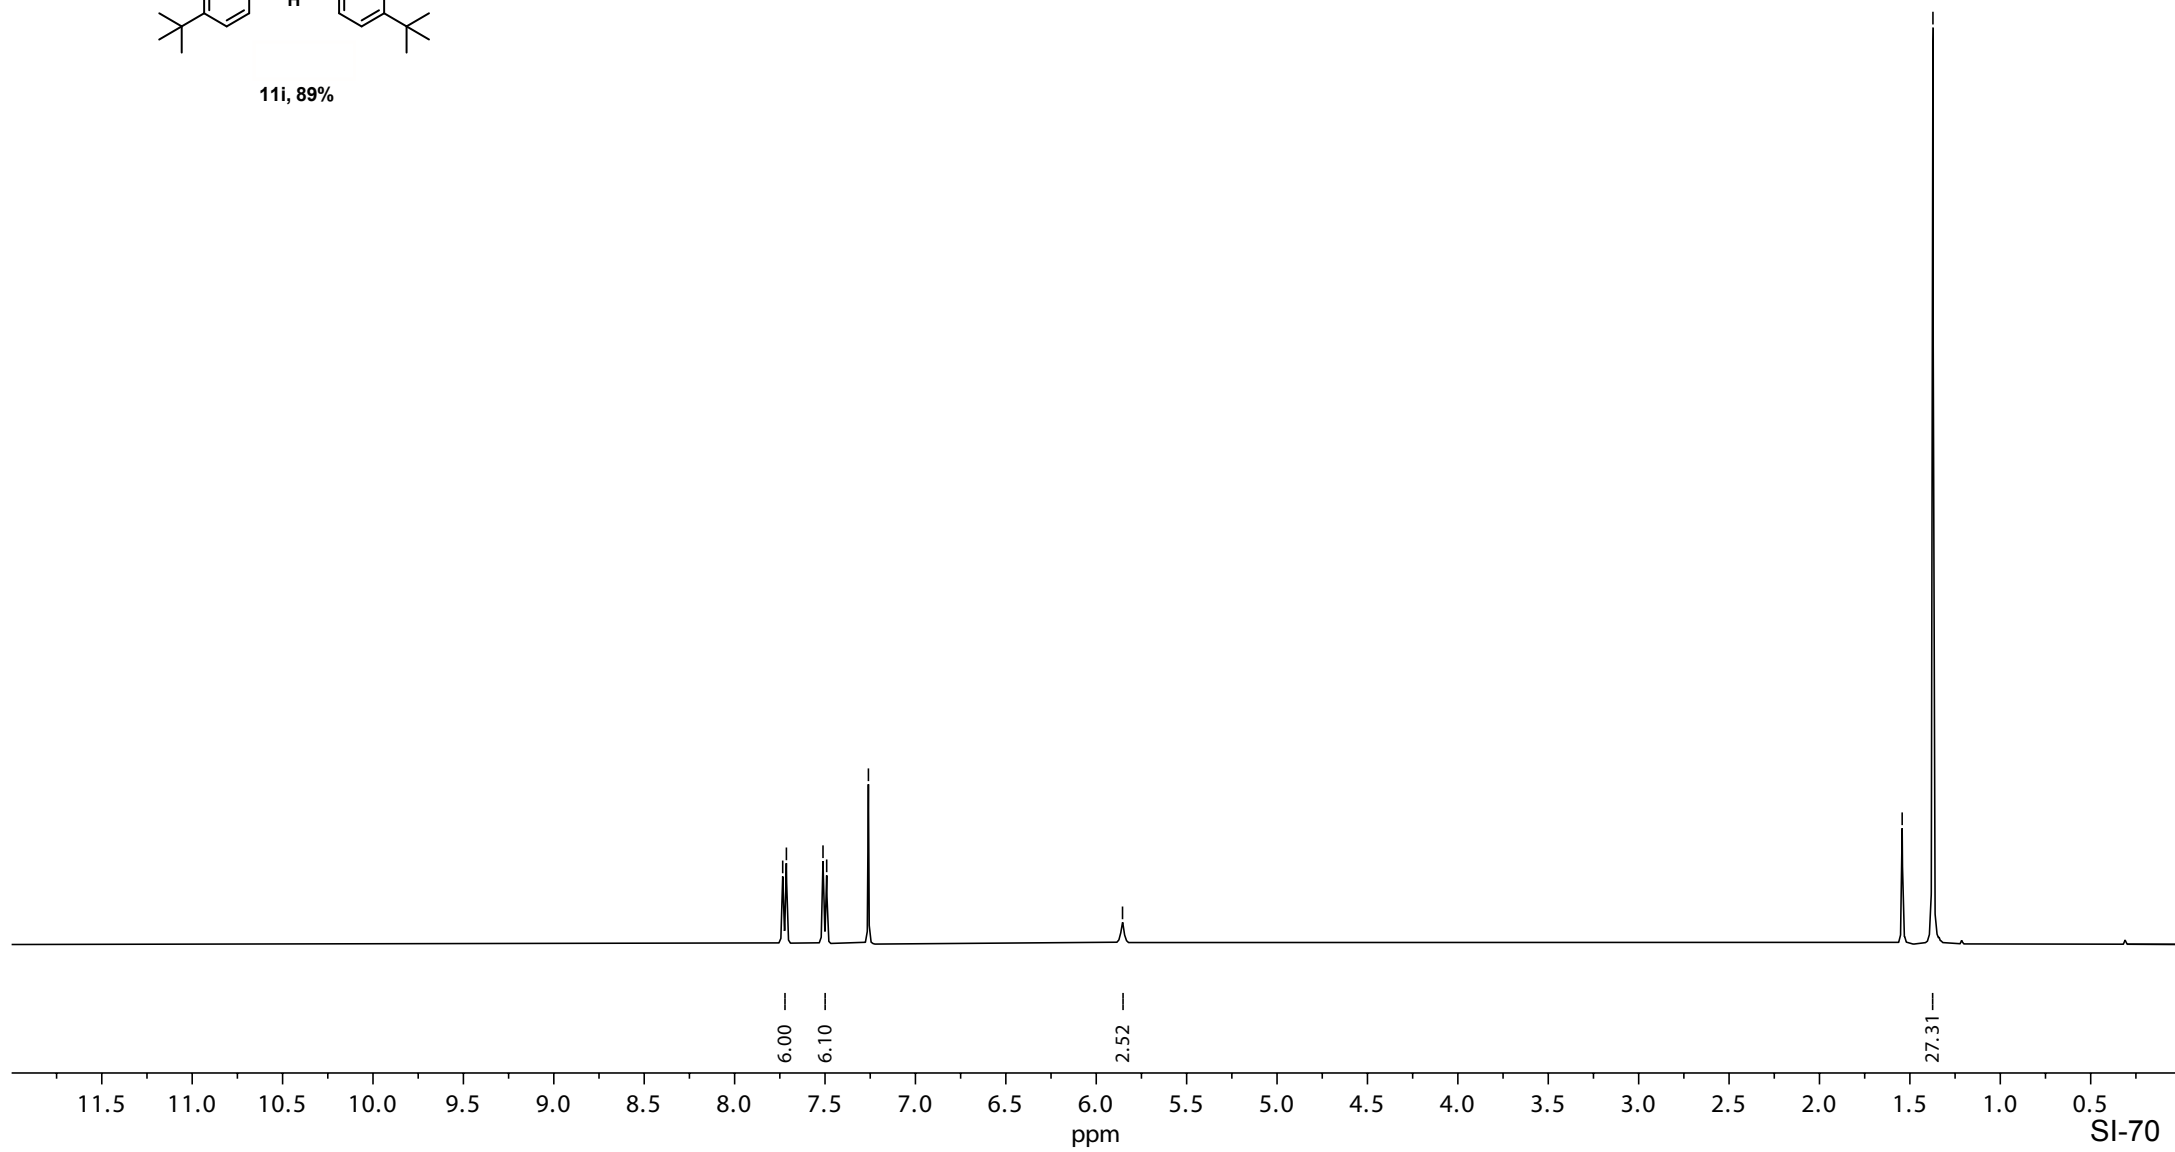

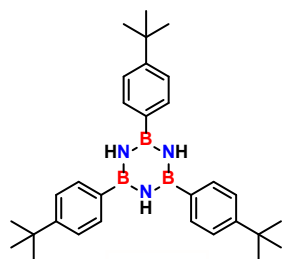

11i, 89%

—33.51

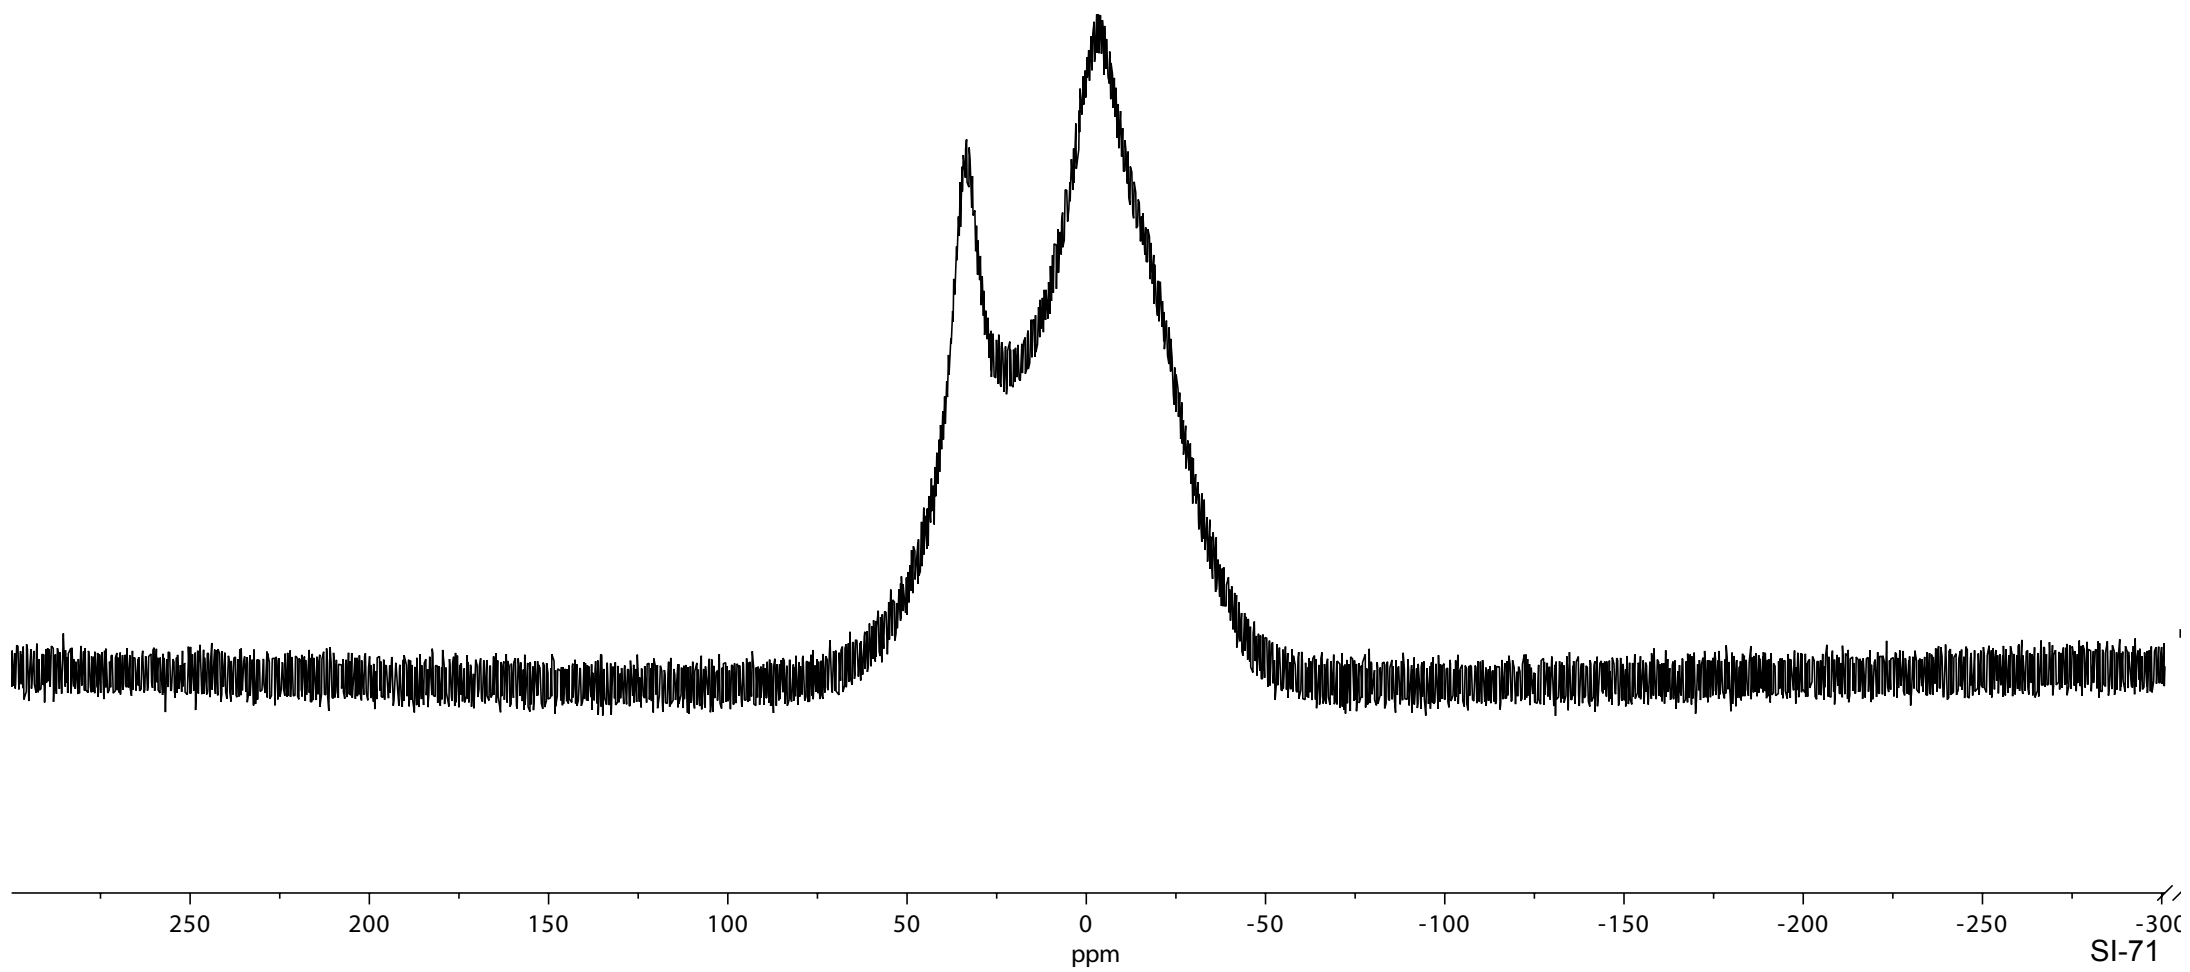

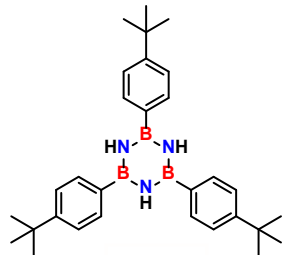

11i, 89%

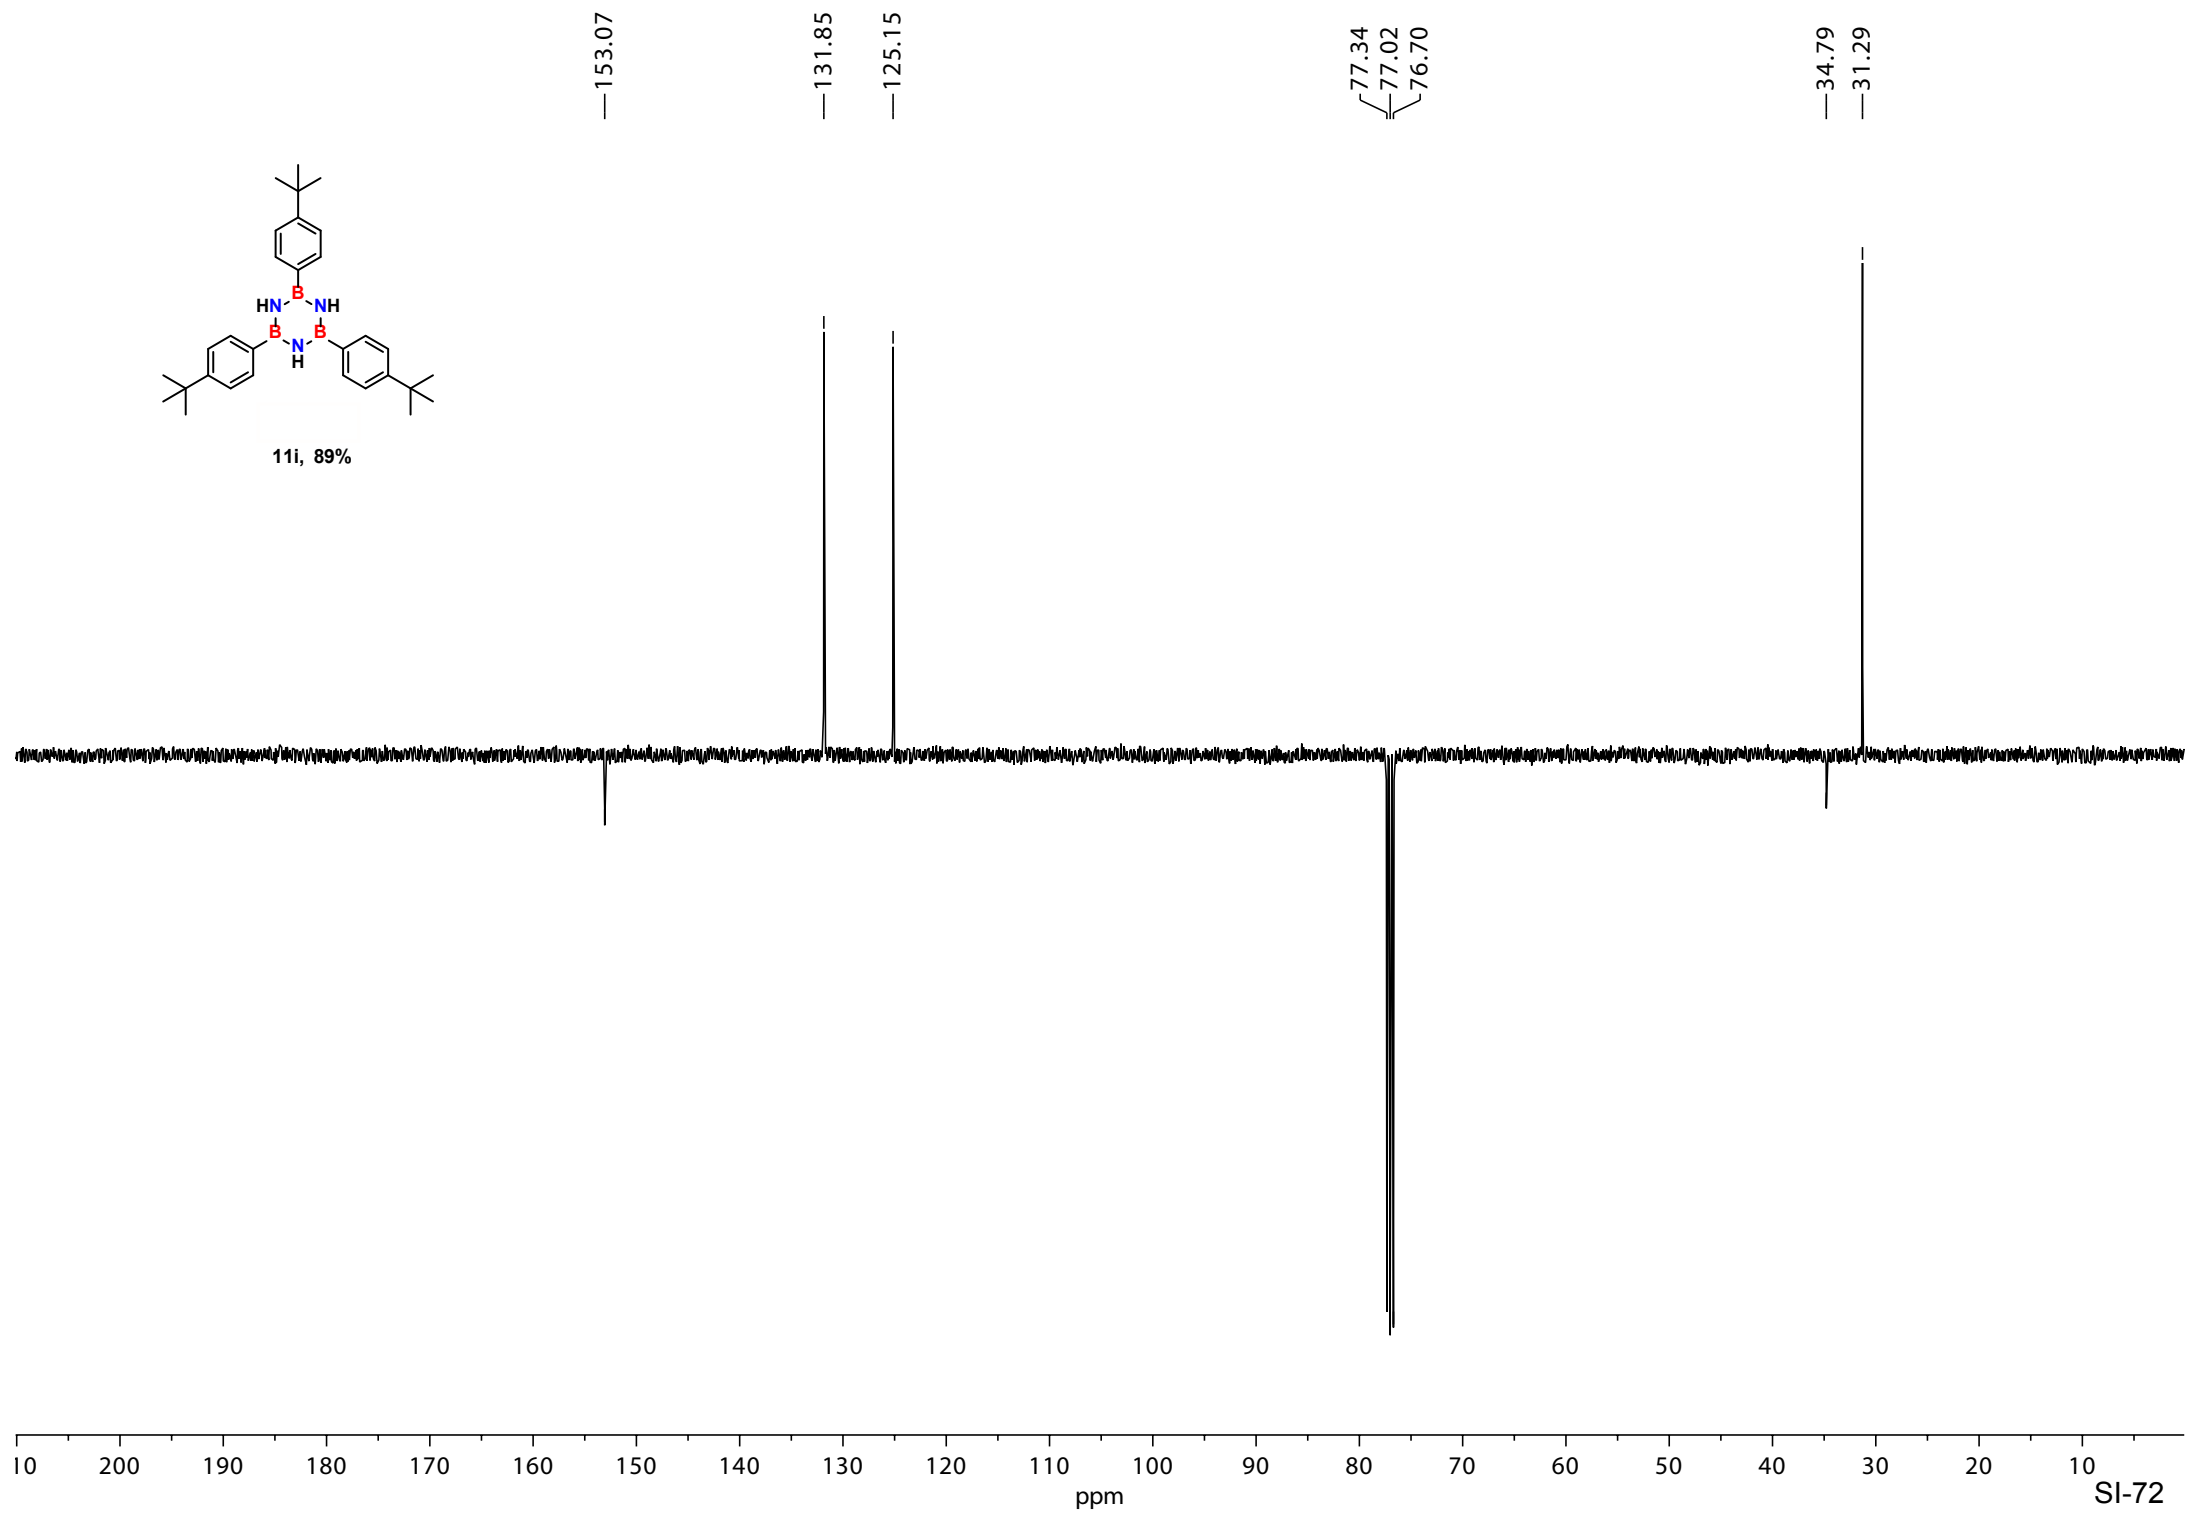

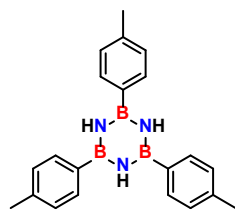

11j, 98%

7.70  
7.68  
7.29  
7.27  
7.26

5.84

2.42

1.54

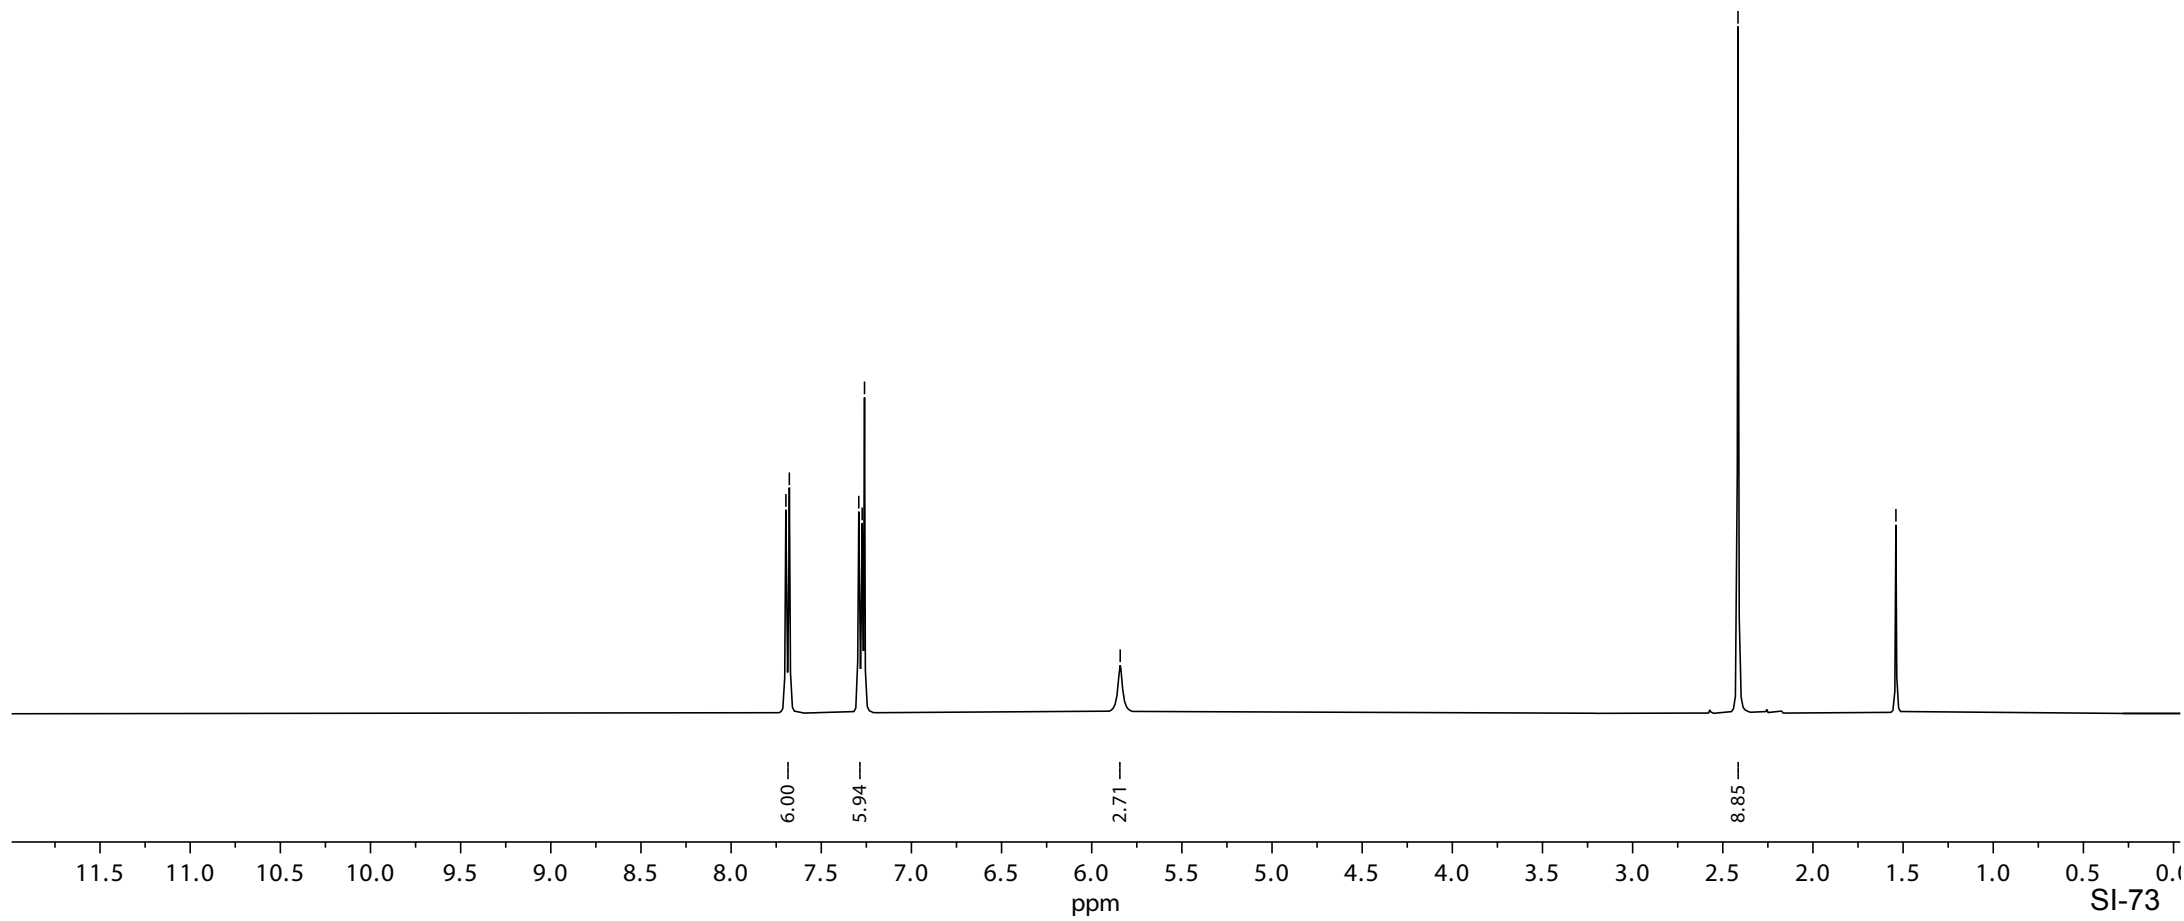

— 33.22

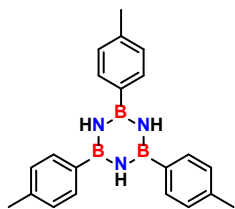

11j, 98%

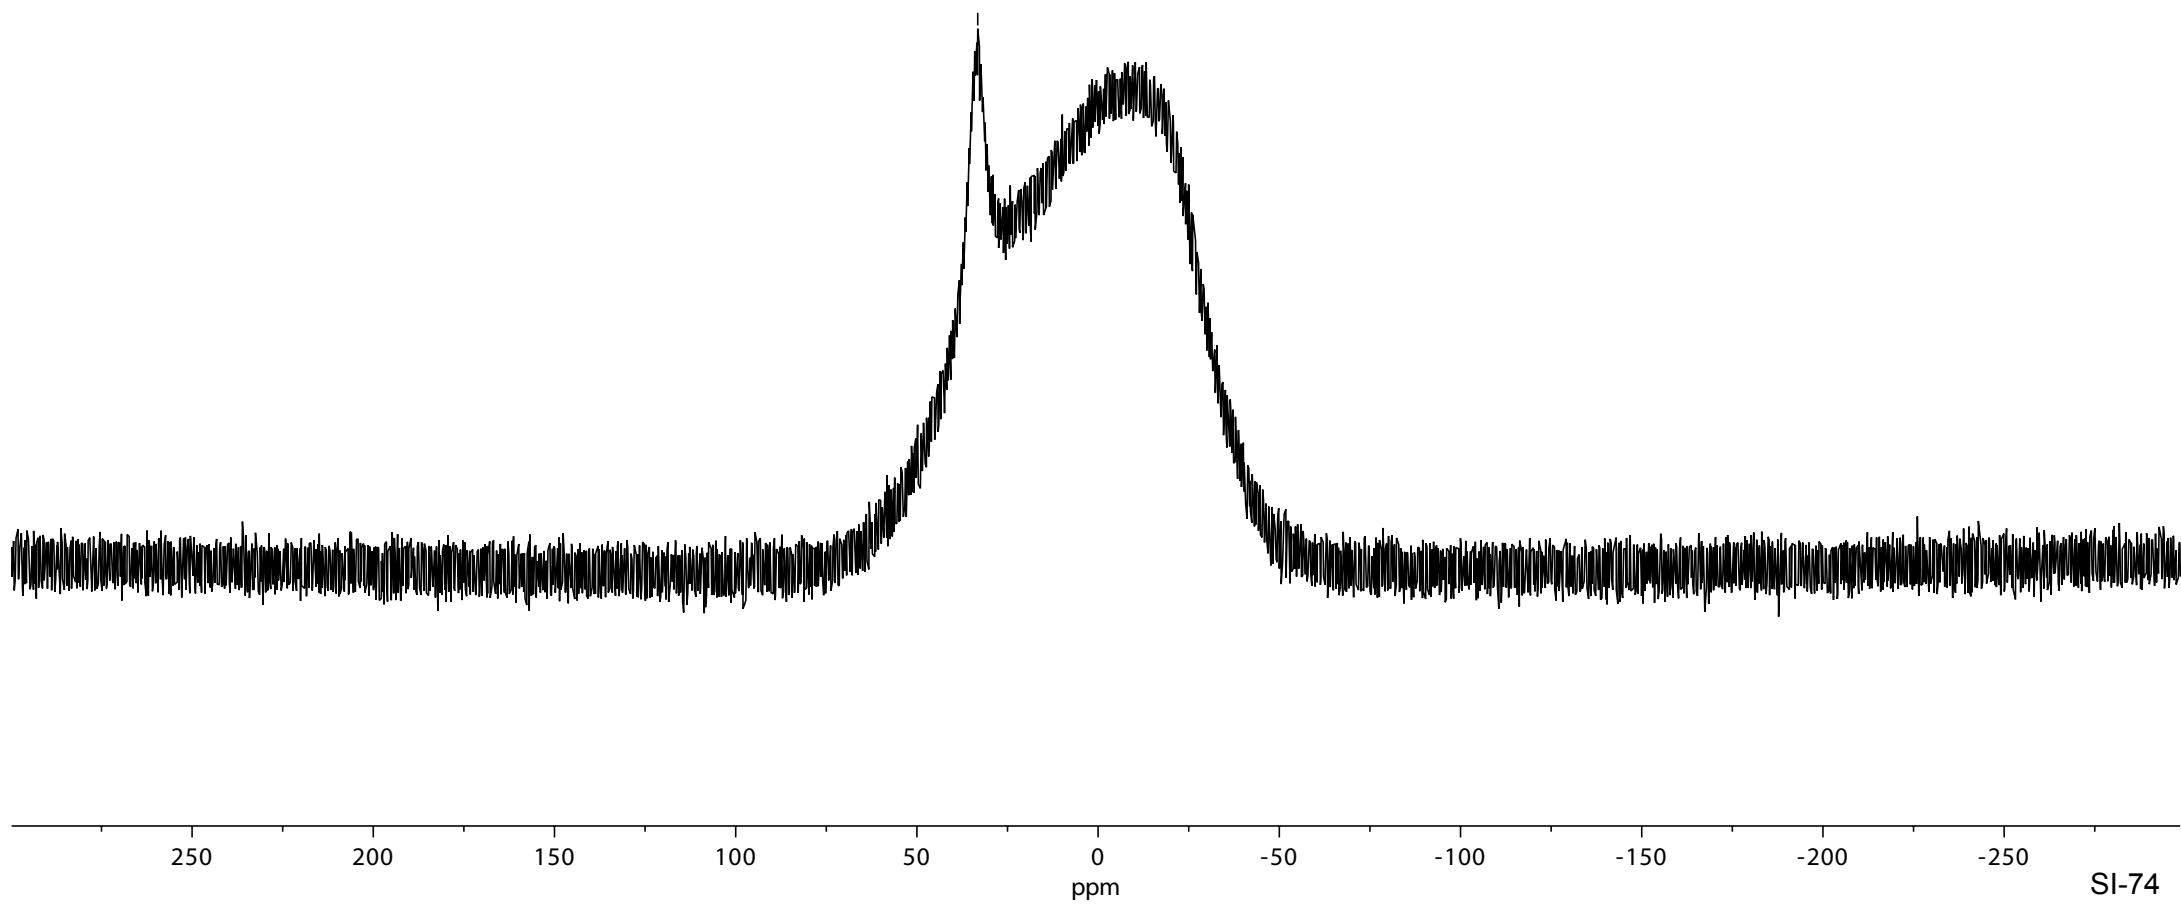

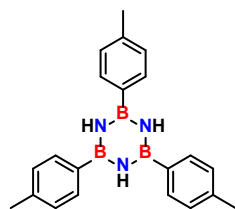

11j, 98%

—139.96

—132.00

—128.97

77.34

77.02

76.70

—21.56

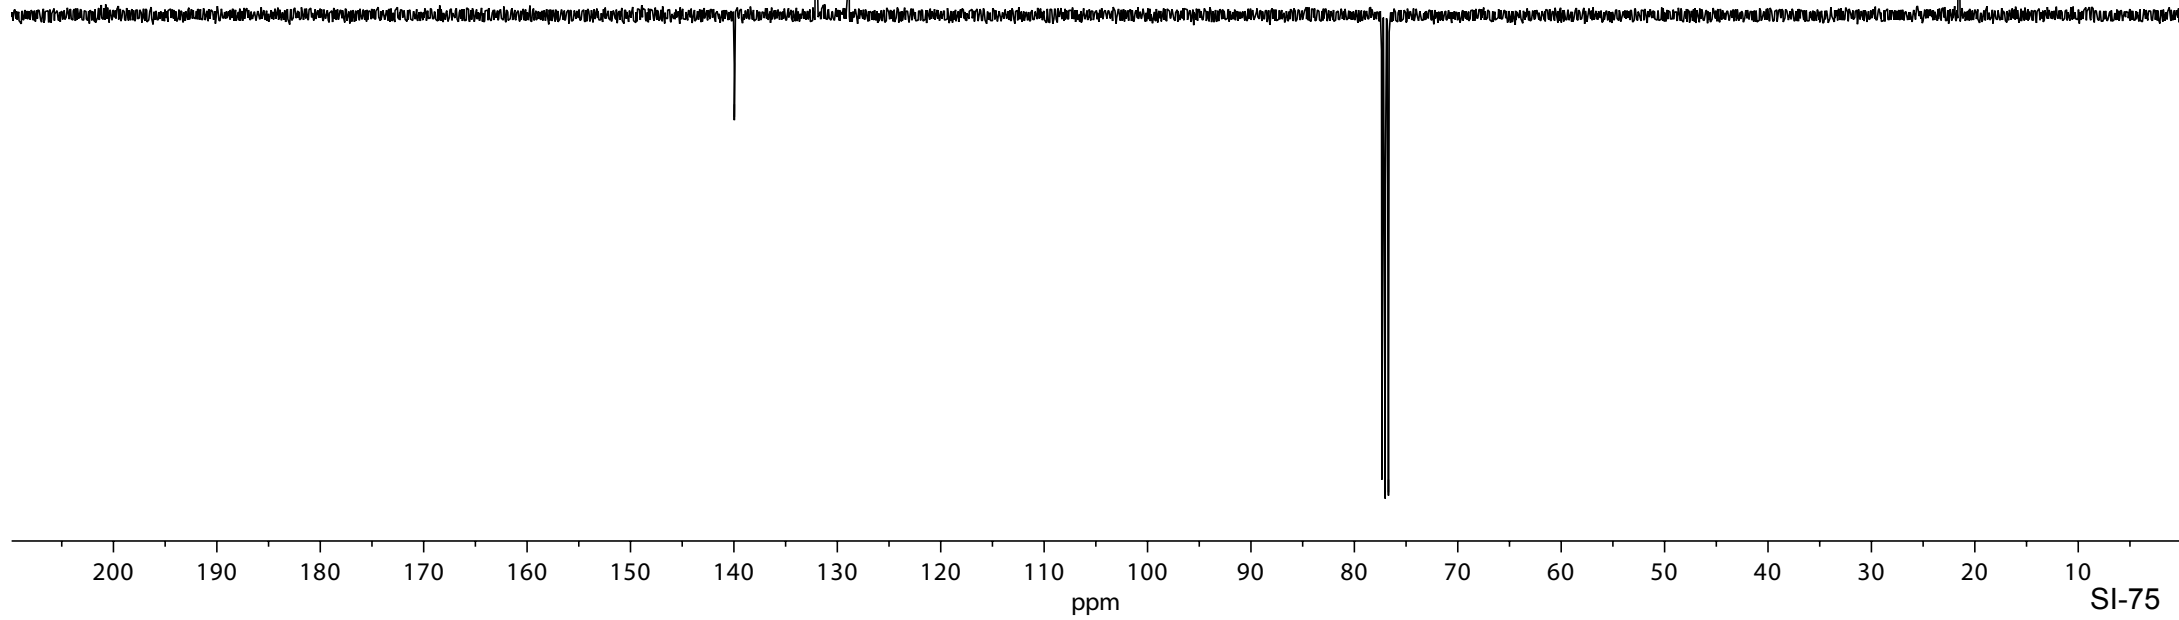

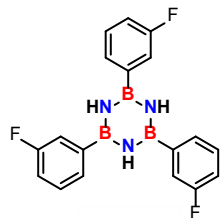

11k, 90%

7.54  
7.52  
7.48  
7.46  
7.46  
7.44  
7.42  
7.42  
7.41  
7.26  
7.20  
7.19  
7.19  
7.19  
7.17  
7.17  
7.15  
7.15  
7.14  
— 5.84

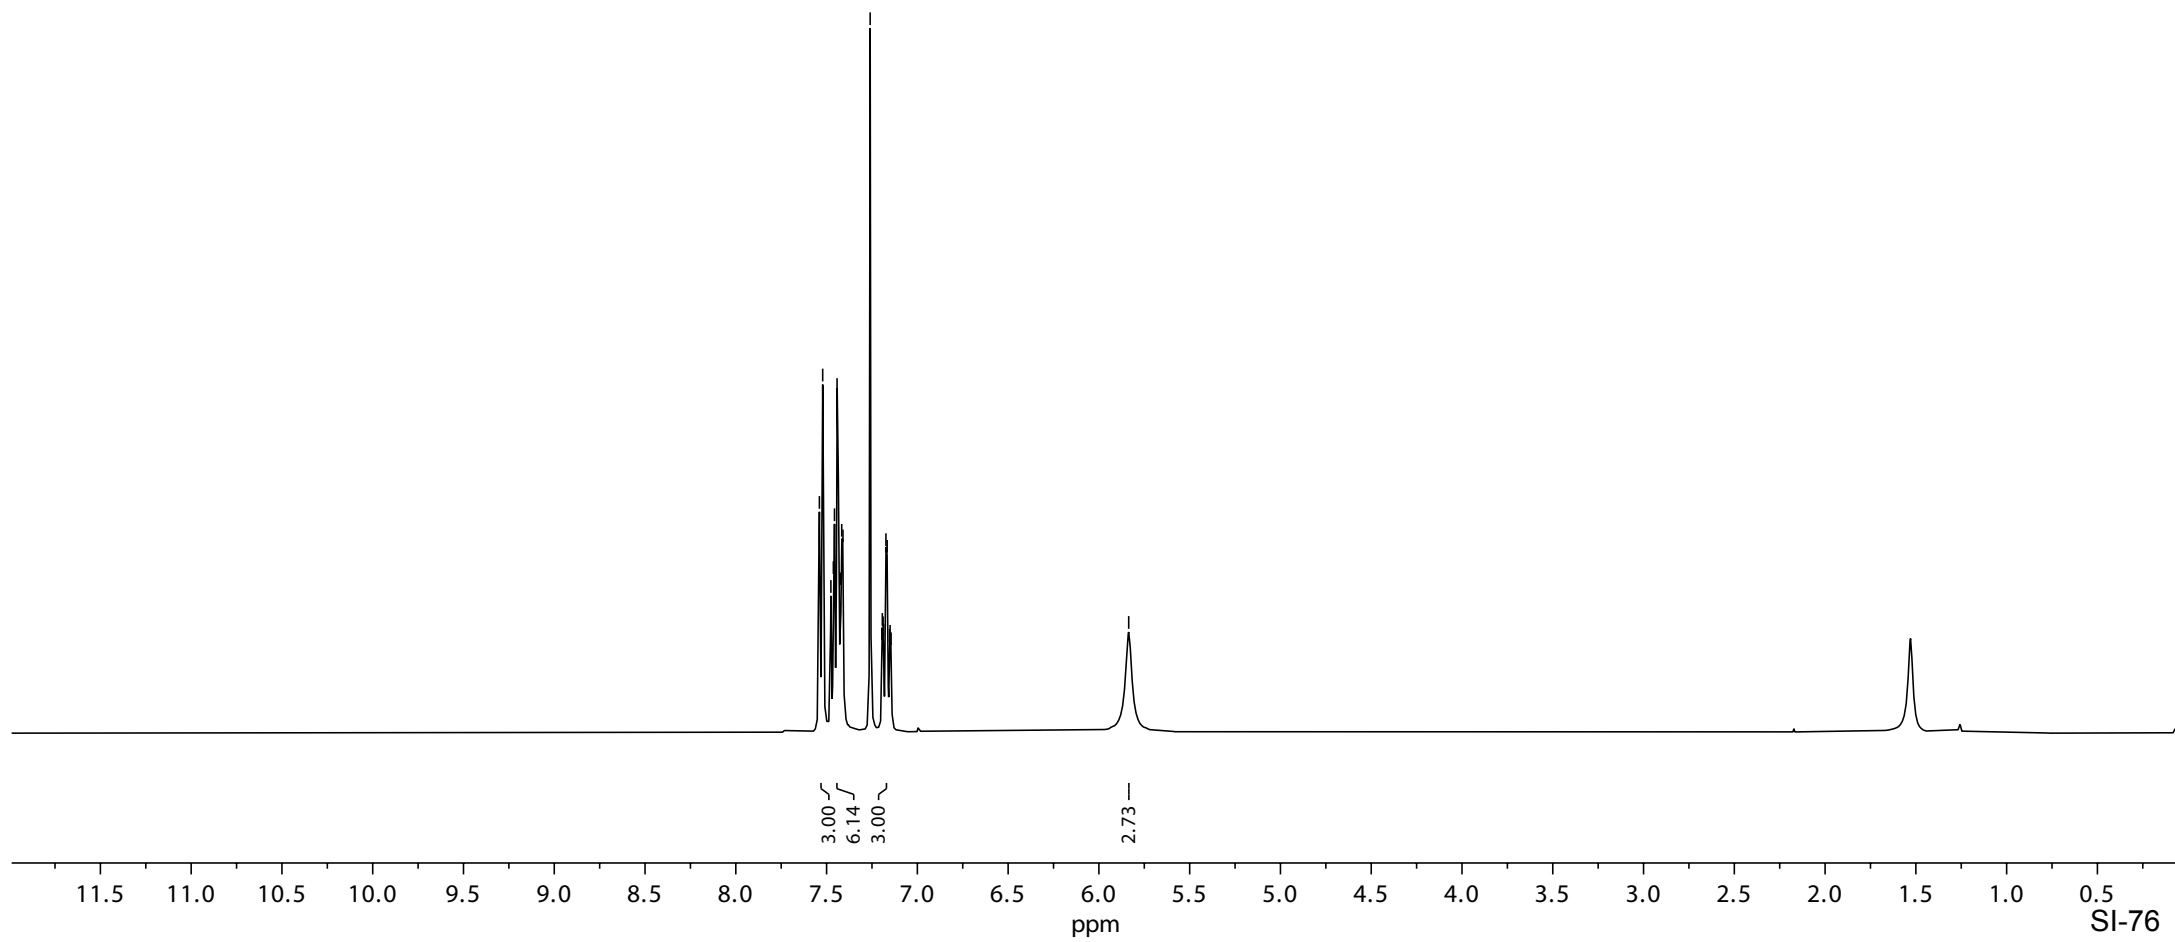

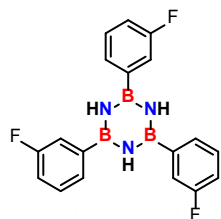

11k, 90%

—33.19

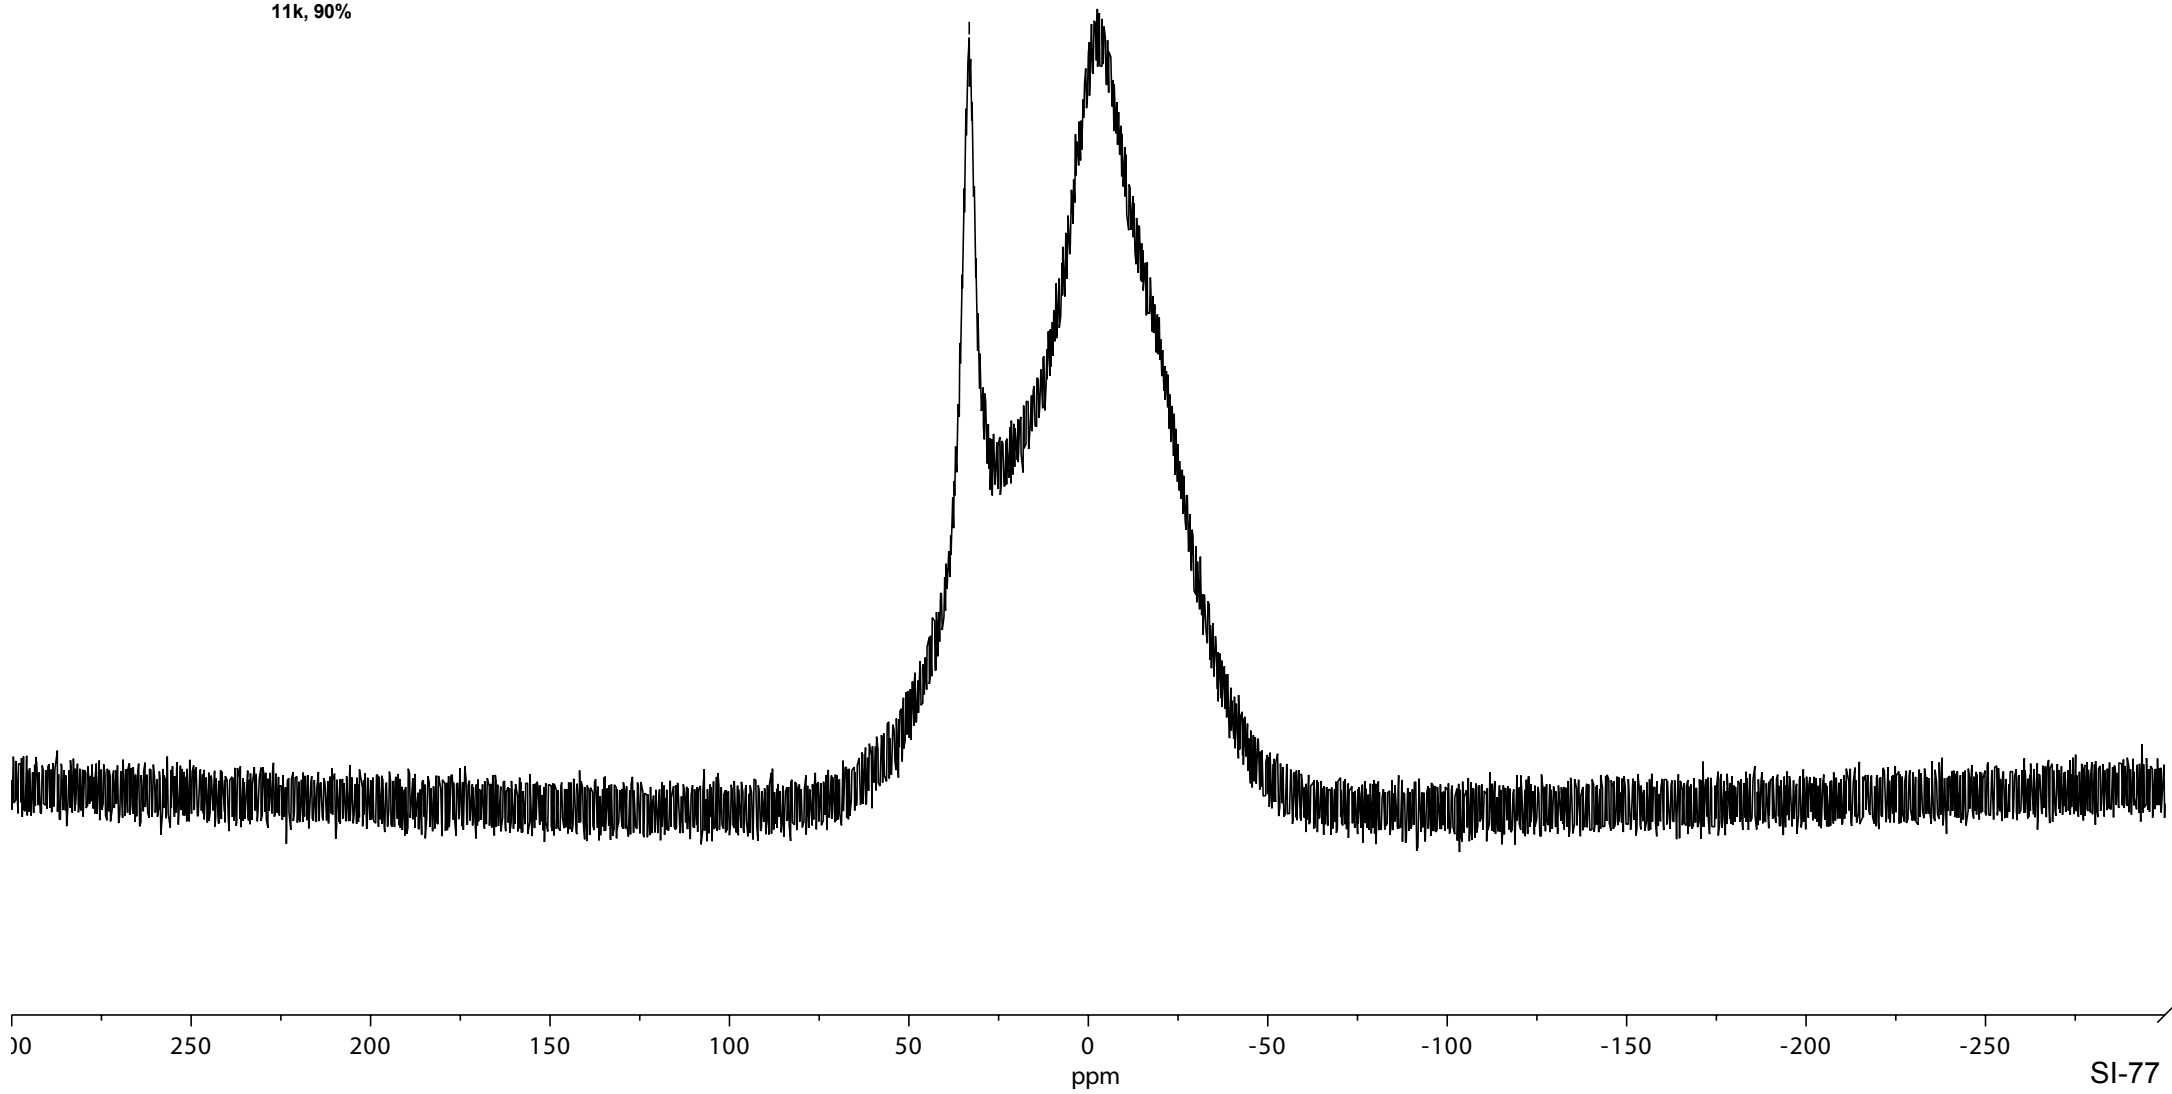

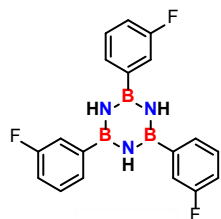

11k, 90%

164.25  
161.79

130.12  
130.04  
127.48  
127.45  
118.43  
118.24  
117.14  
116.93

77.32  
77.01  
76.69

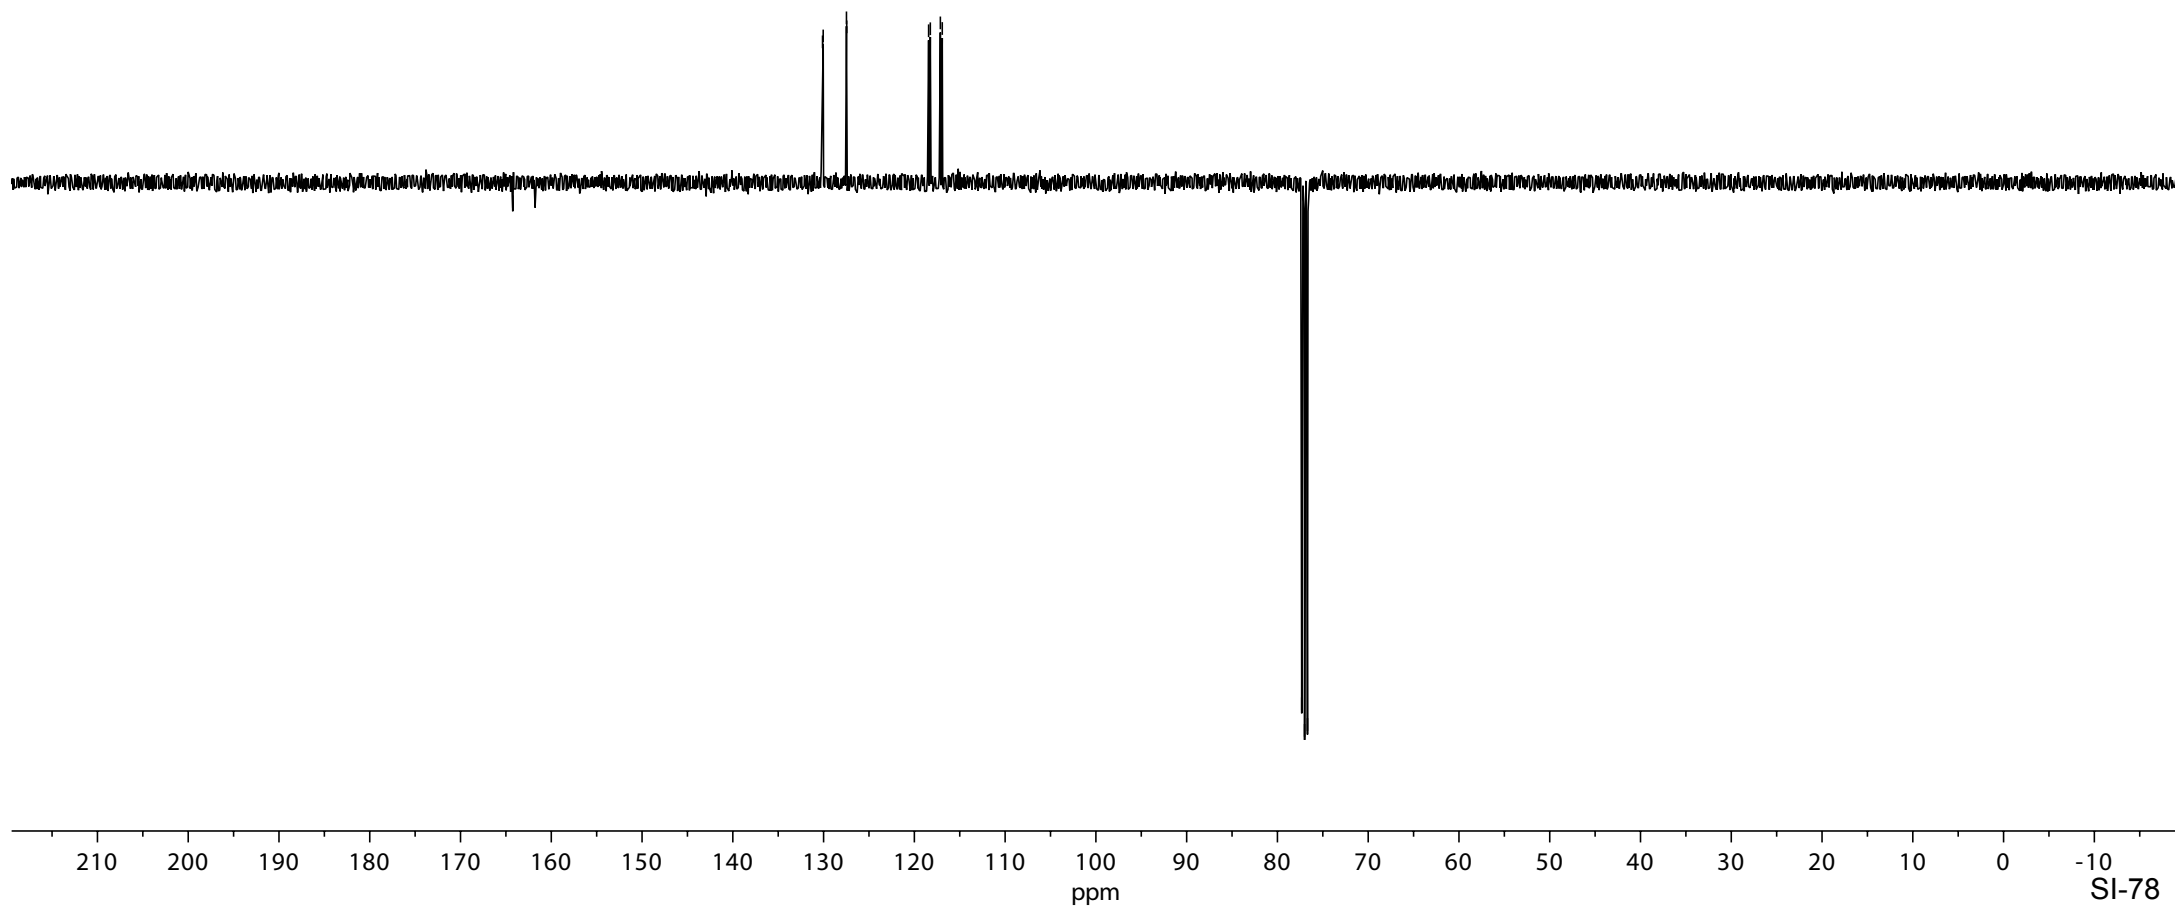

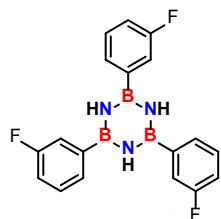

11k, 90%

113.35  
113.37  
113.38  
113.39  
113.40  
113.42

113.35  
113.37  
113.38  
113.39  
113.40  
113.42

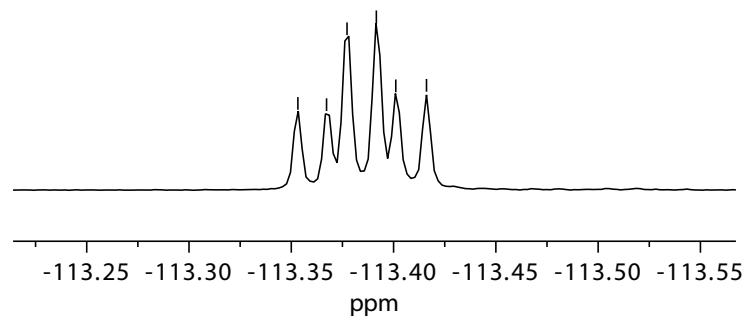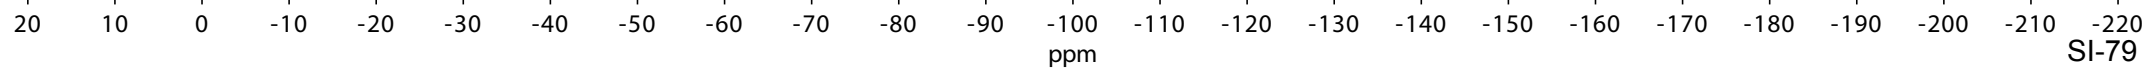

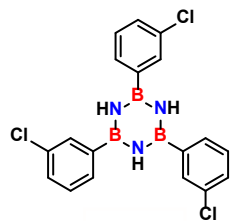

111, 86%

7.71  
7.64  
7.62  
7.48  
7.47  
7.47  
7.46  
7.45  
7.45  
7.43  
7.41  
7.39  
7.26

5.83

1.54

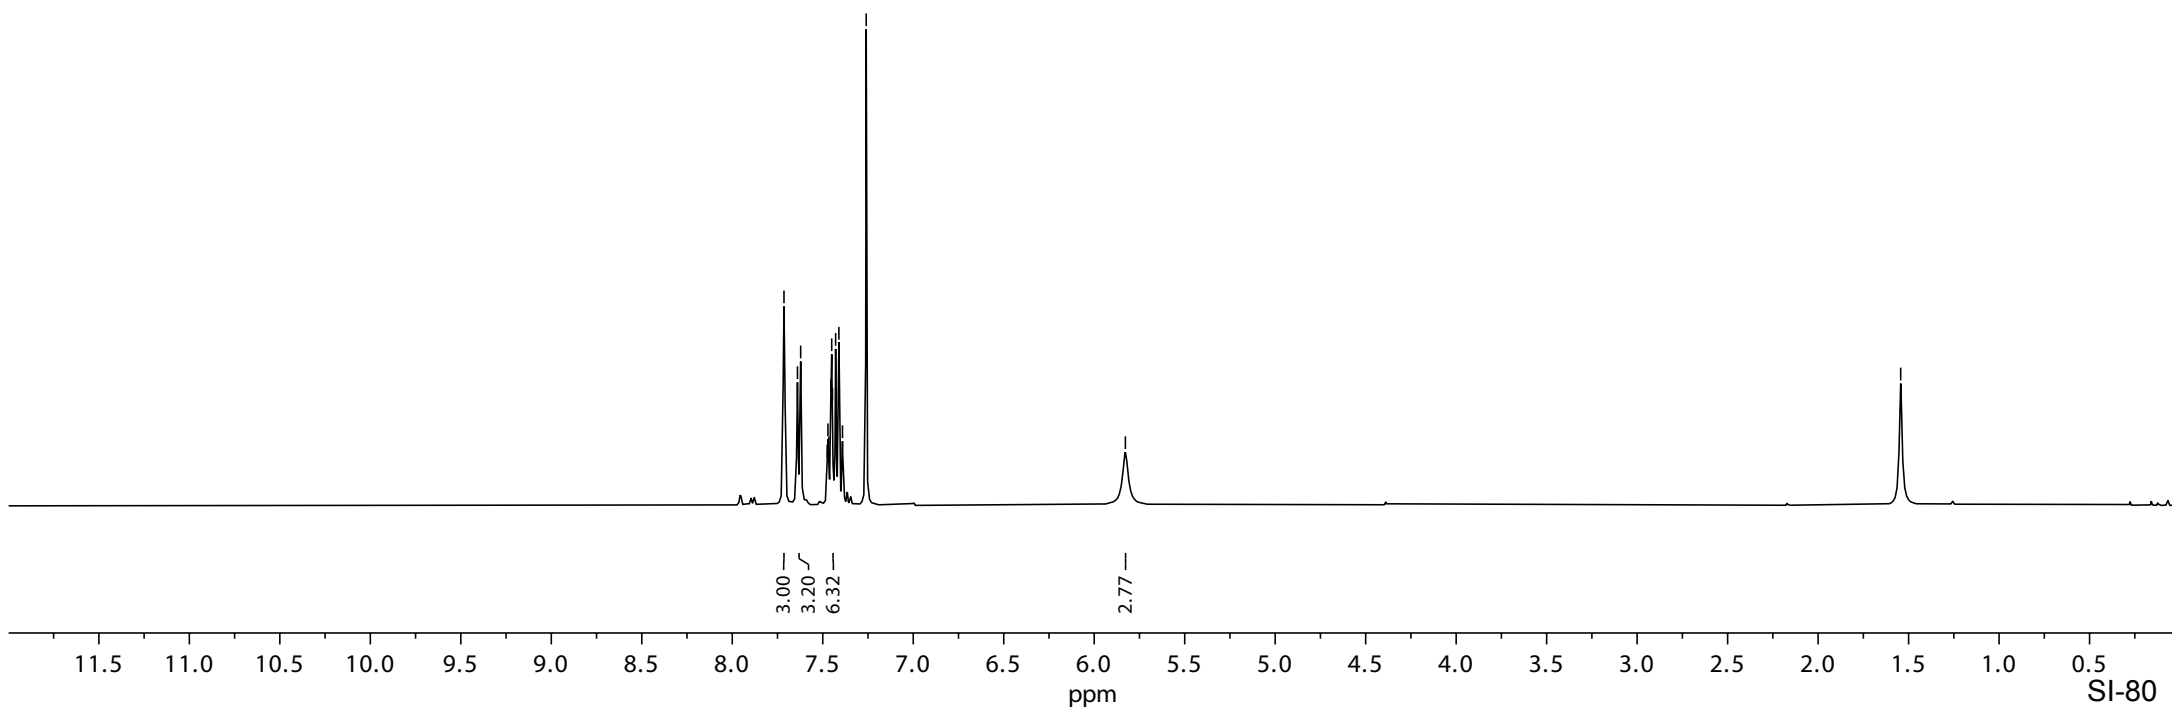

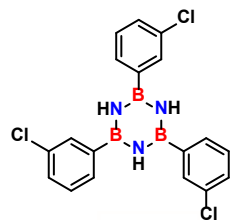

111, 86%

—32.91

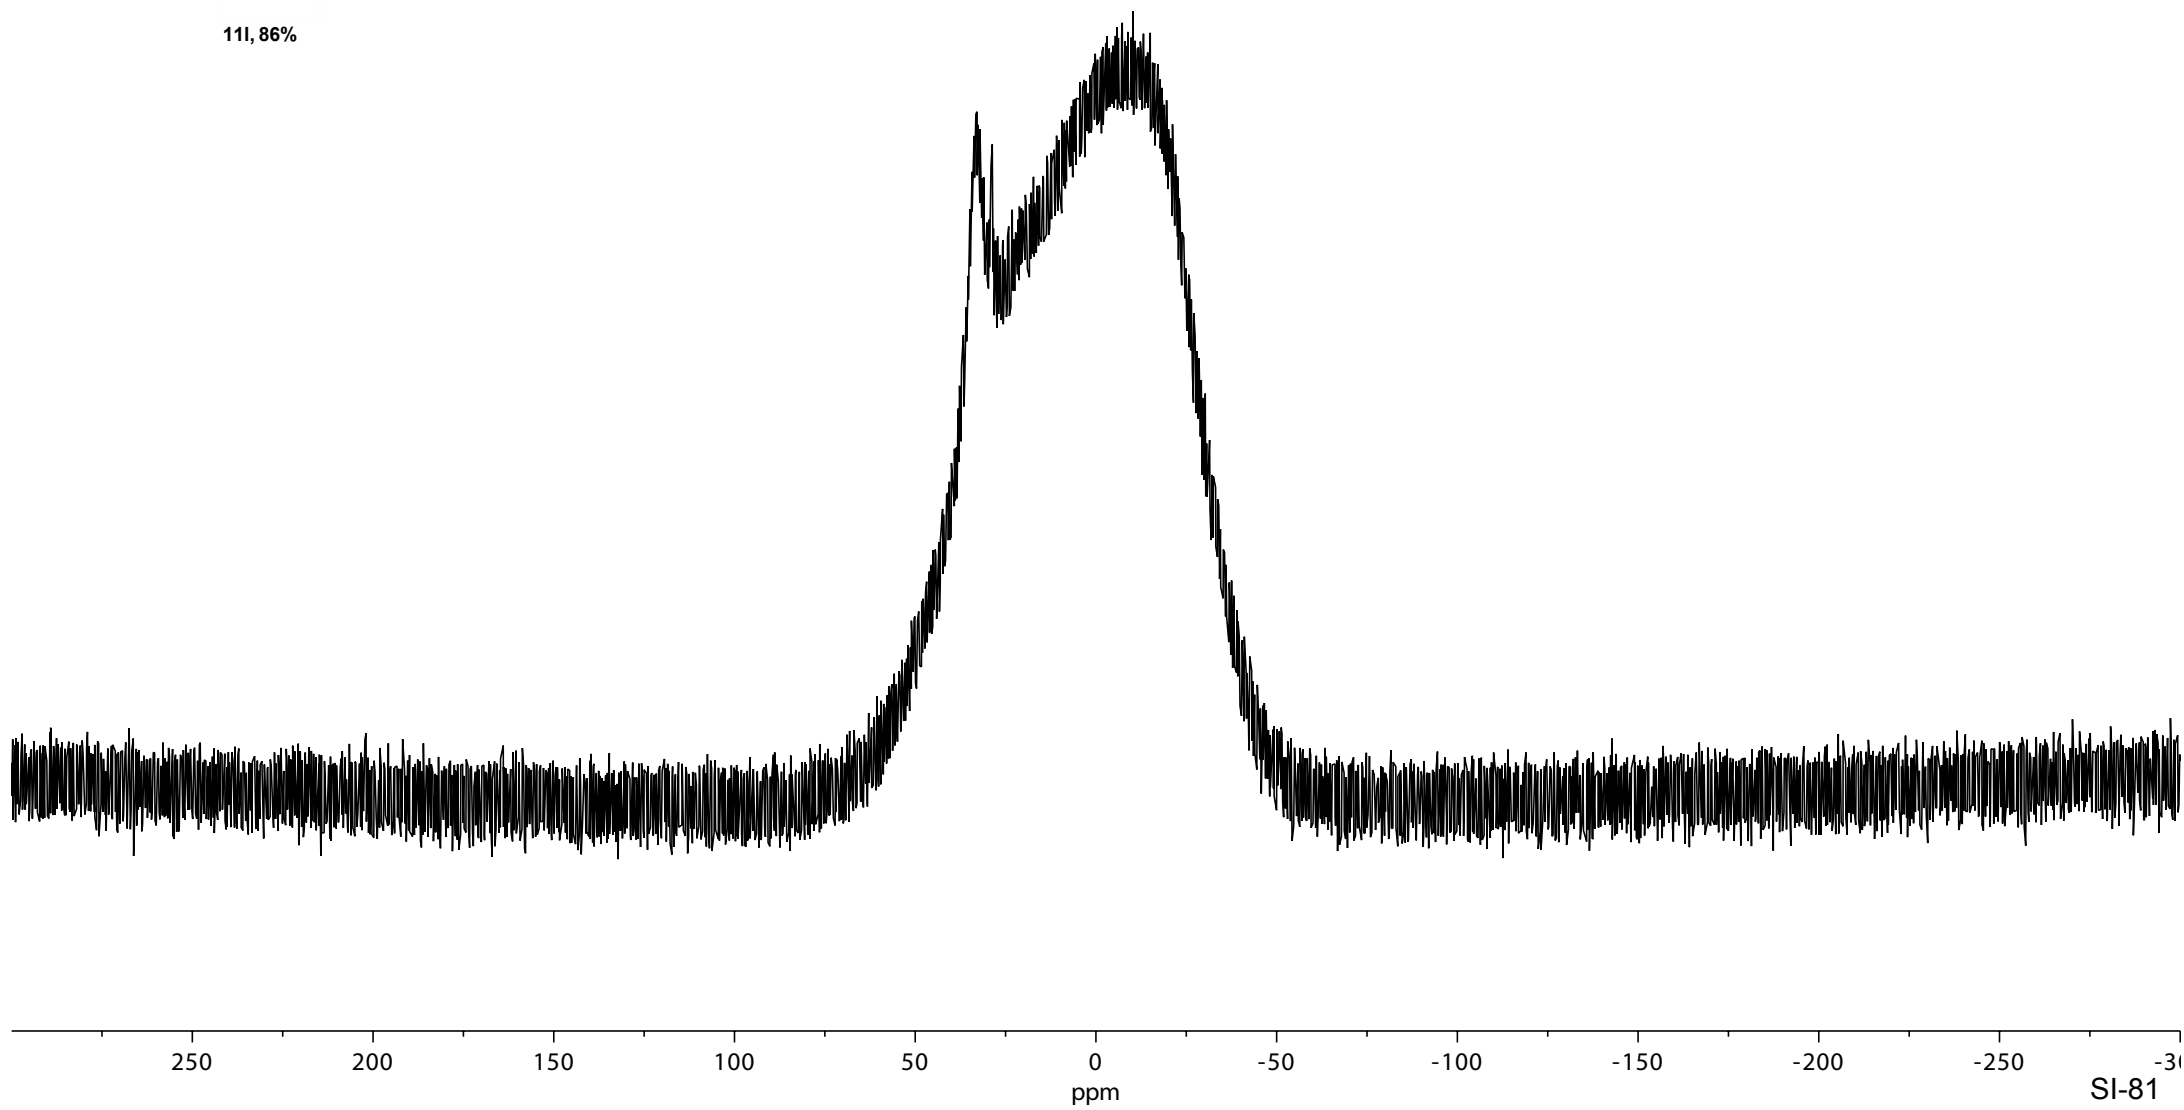

SI-81

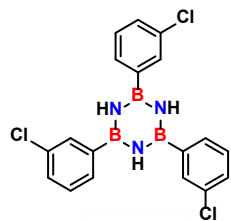

111, 86%

134.65  
131.91  
130.20  
129.93  
129.75

77.32  
77.01  
76.69

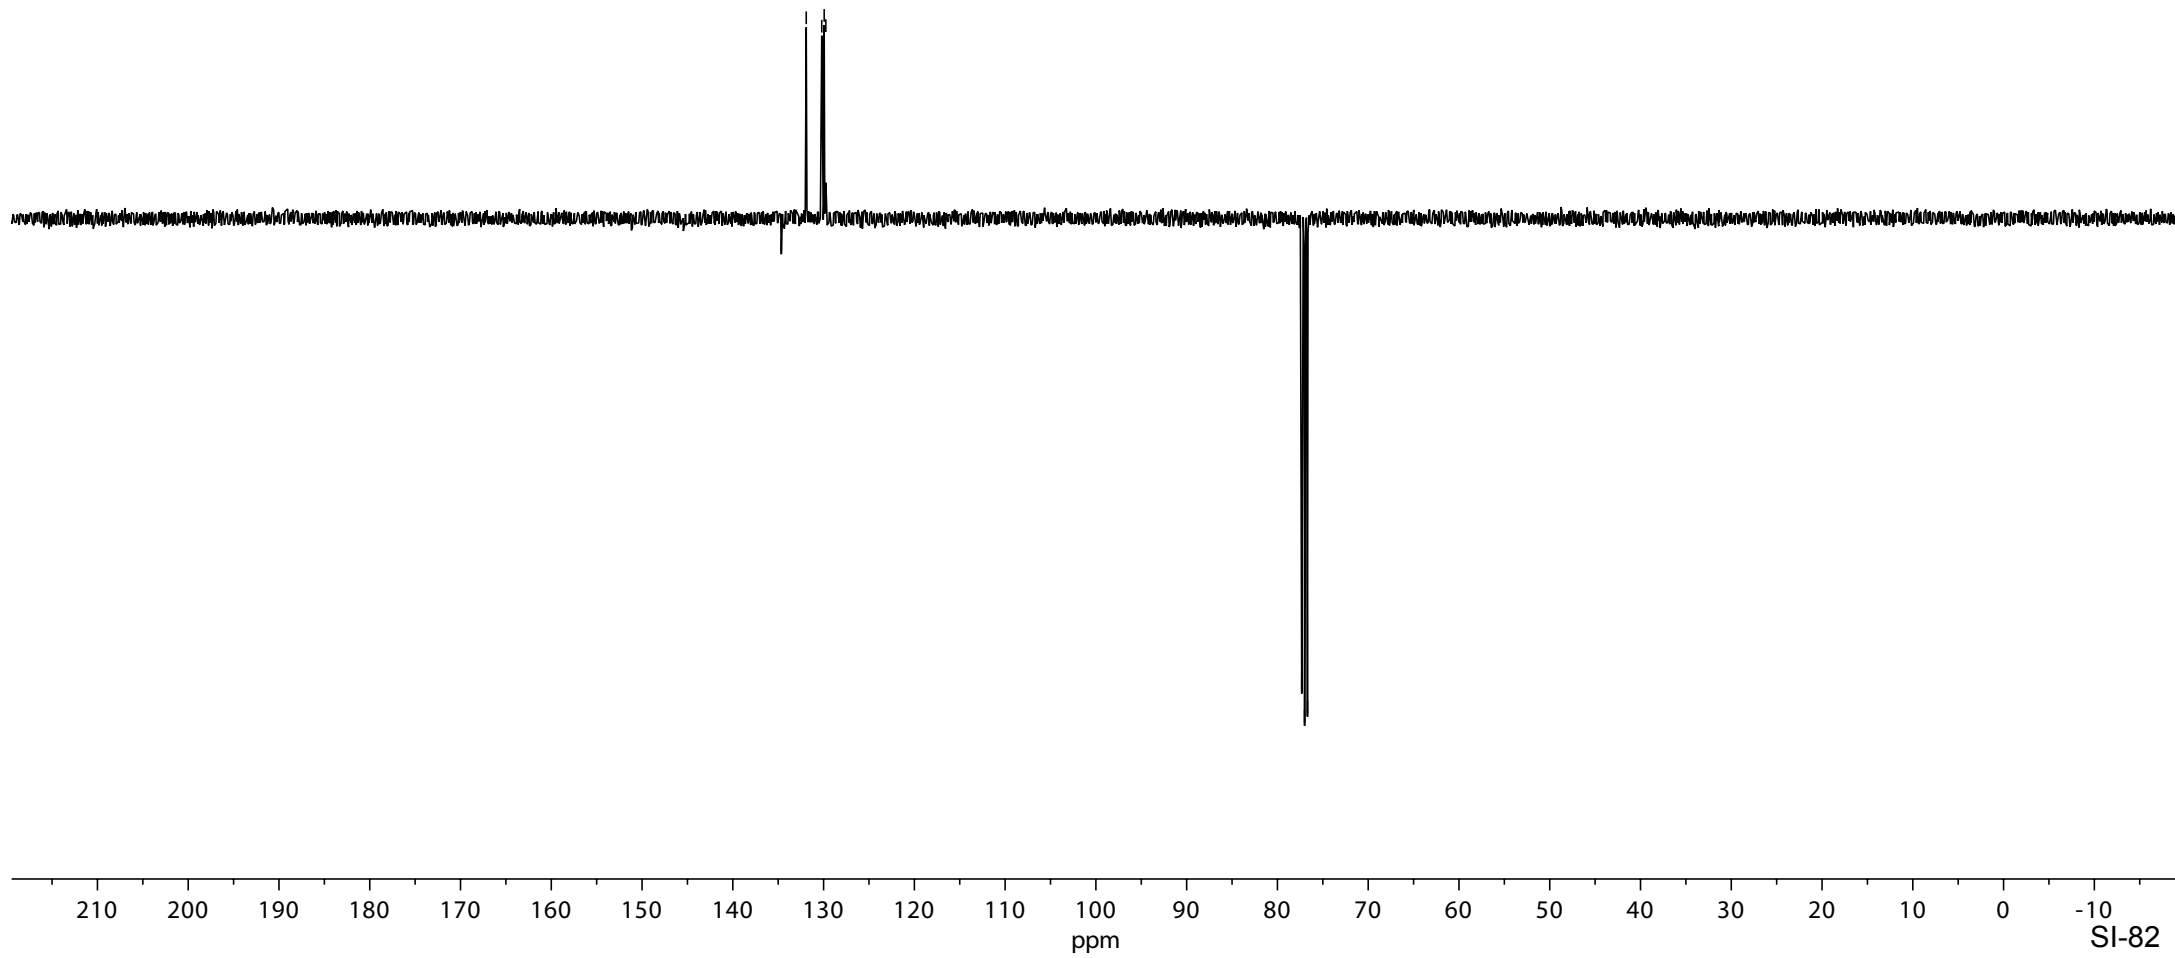

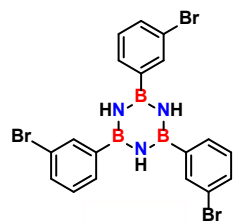

11m, 71%

7.87  
7.68  
7.67  
7.62  
7.62  
7.60  
7.60  
7.37  
7.35  
7.33  
7.26

—5.81

—1.53

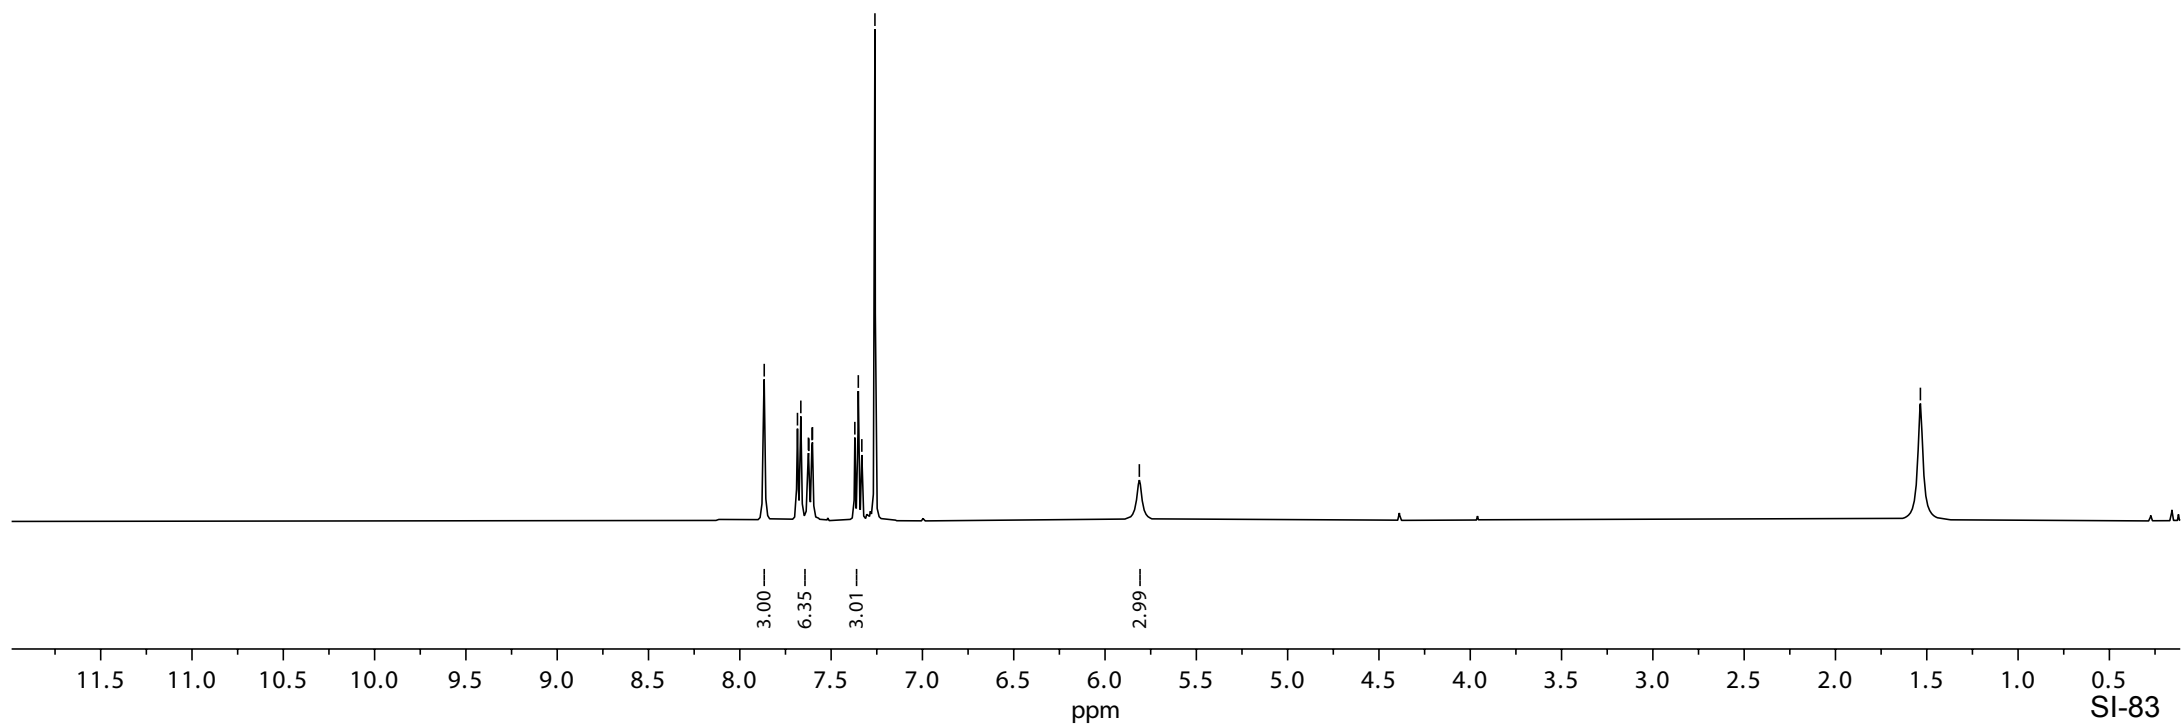

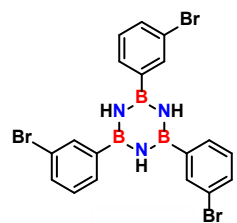

11m, 71%

— 33.03

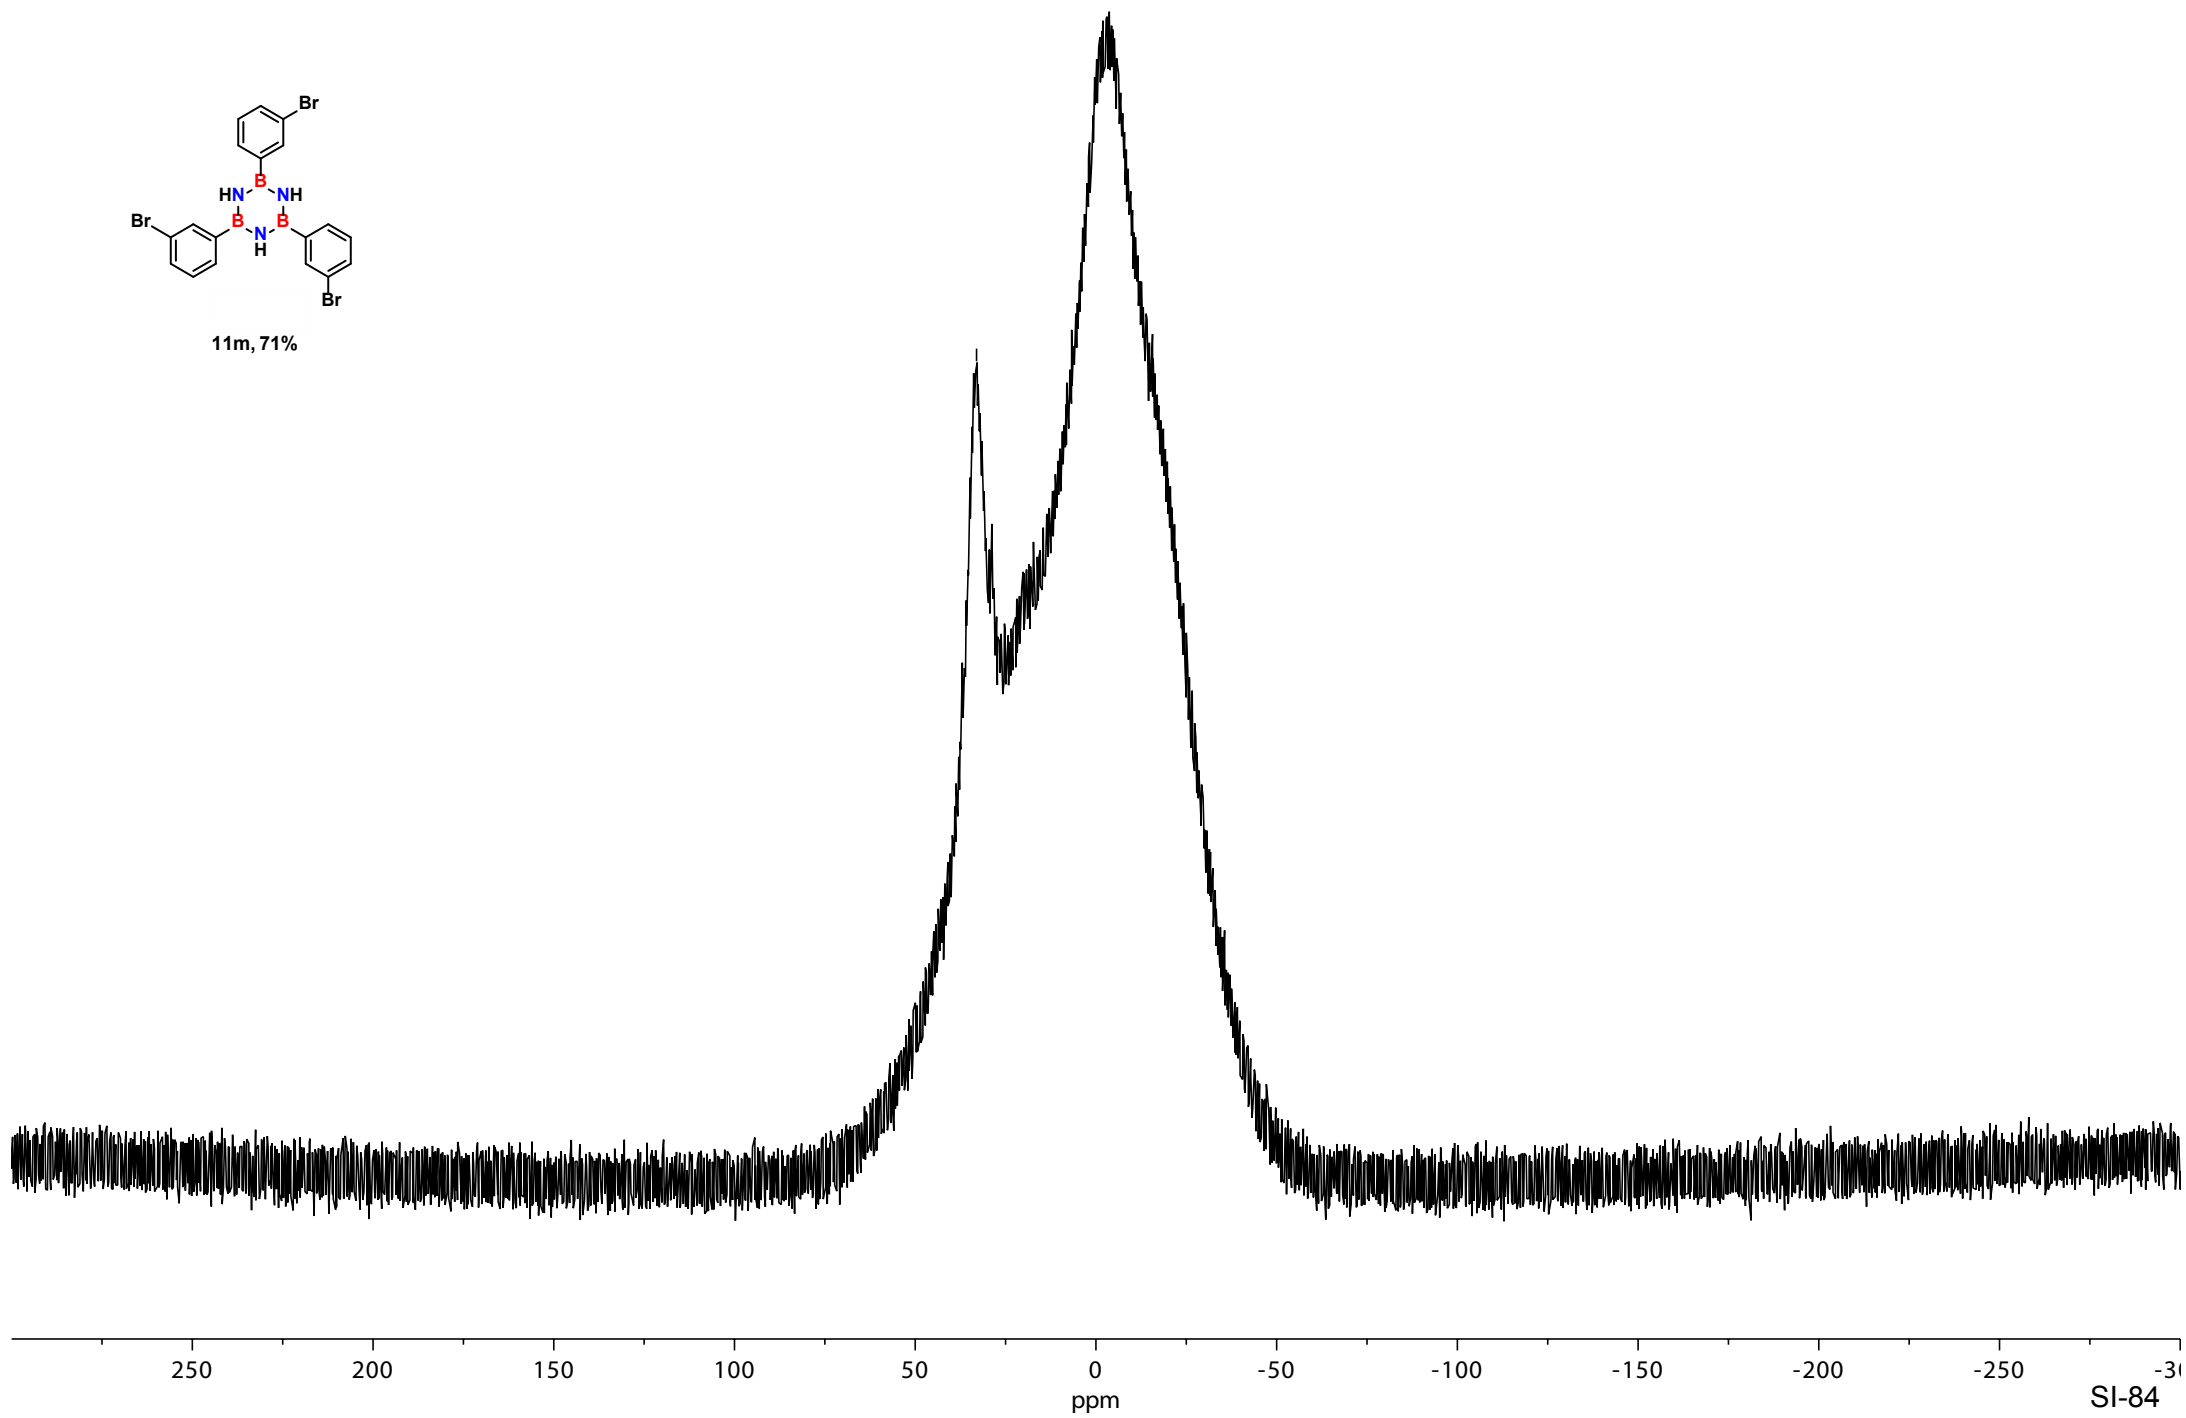

SI-84

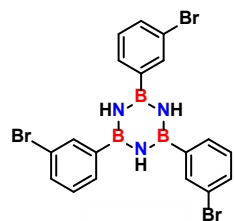

11m, 71%

134.84  
133.13  
130.39  
130.06  
— 123.15

77.34  
77.02  
76.70

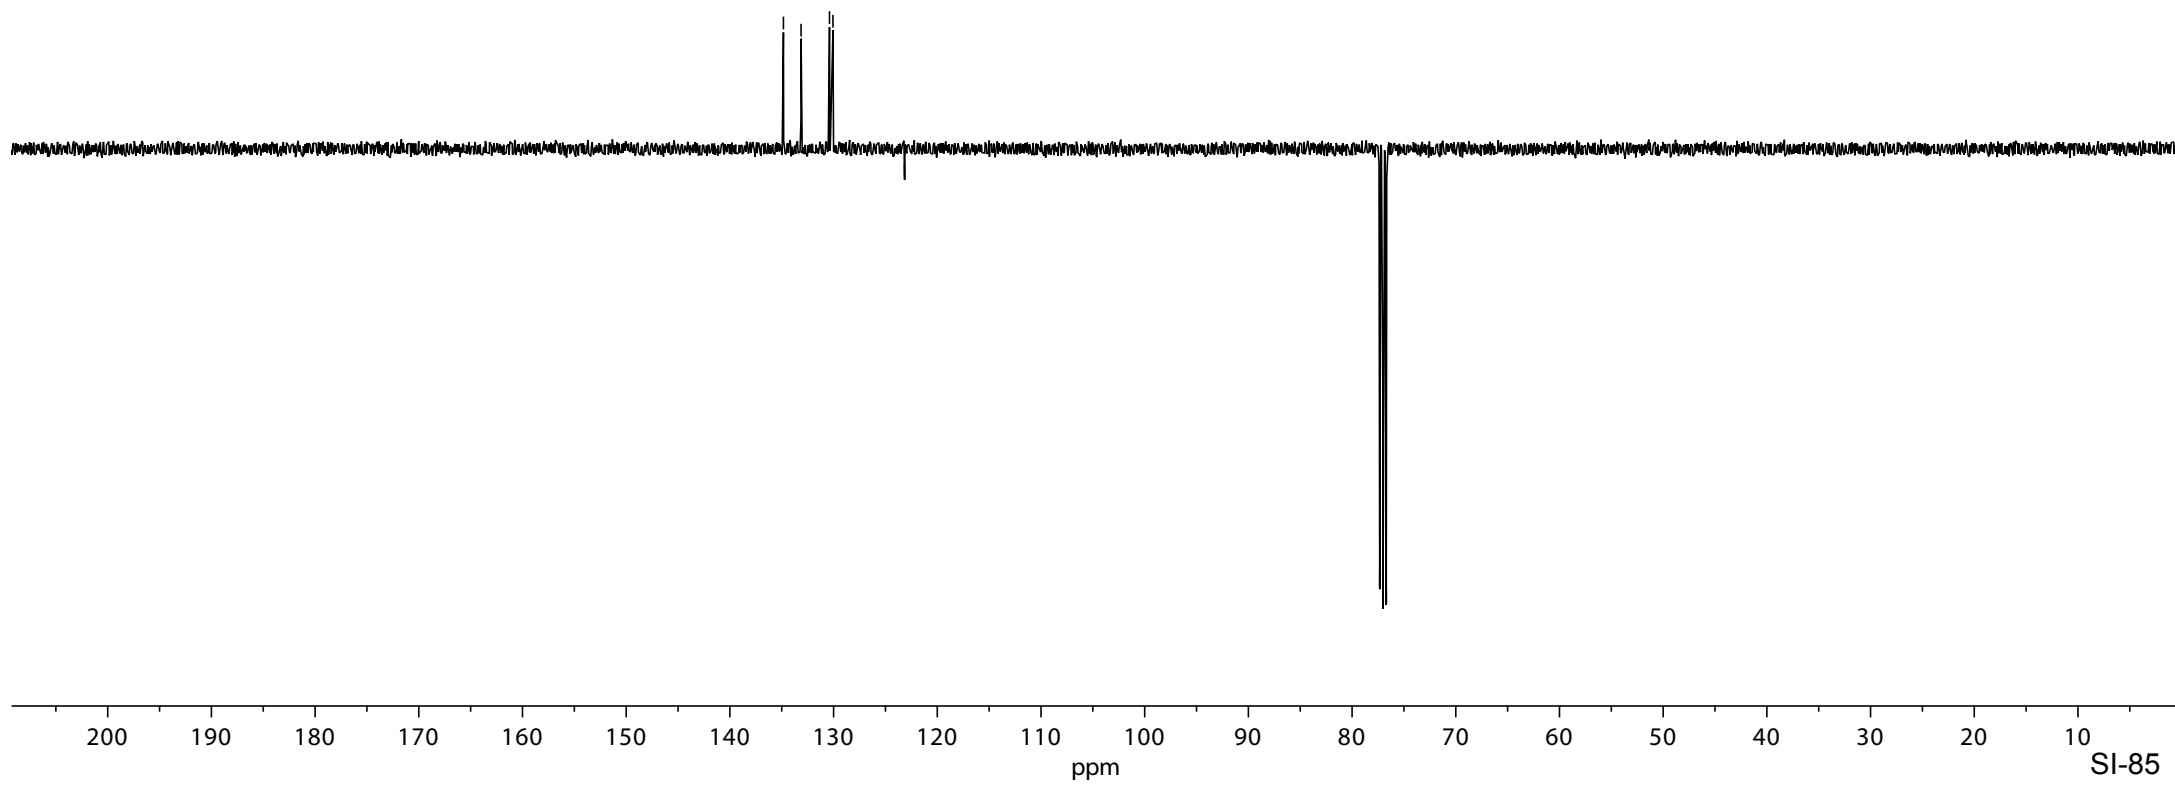

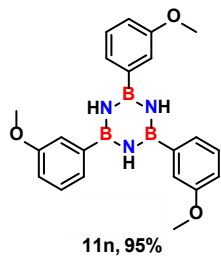

7.42  
7.41  
7.39  
7.36  
7.34  
7.34  
7.34  
7.29  
7.28  
7.28  
7.28  
7.26  
7.03  
7.03  
7.03  
7.02  
7.01  
7.01  
7.01  
7.00  
— 5.85

— 3.88

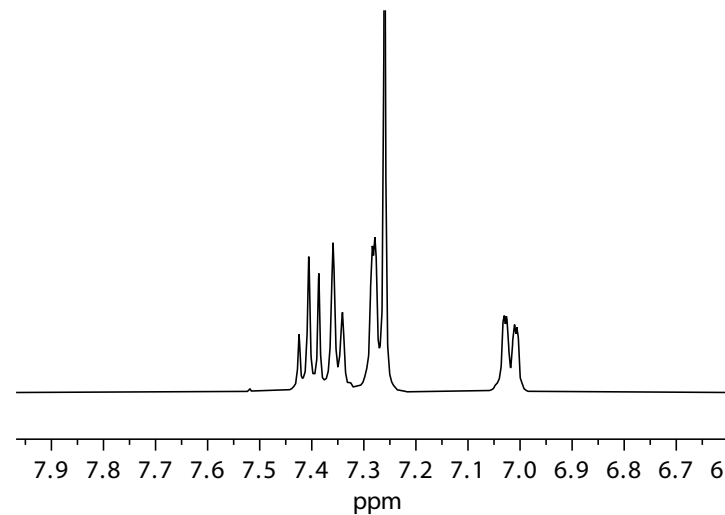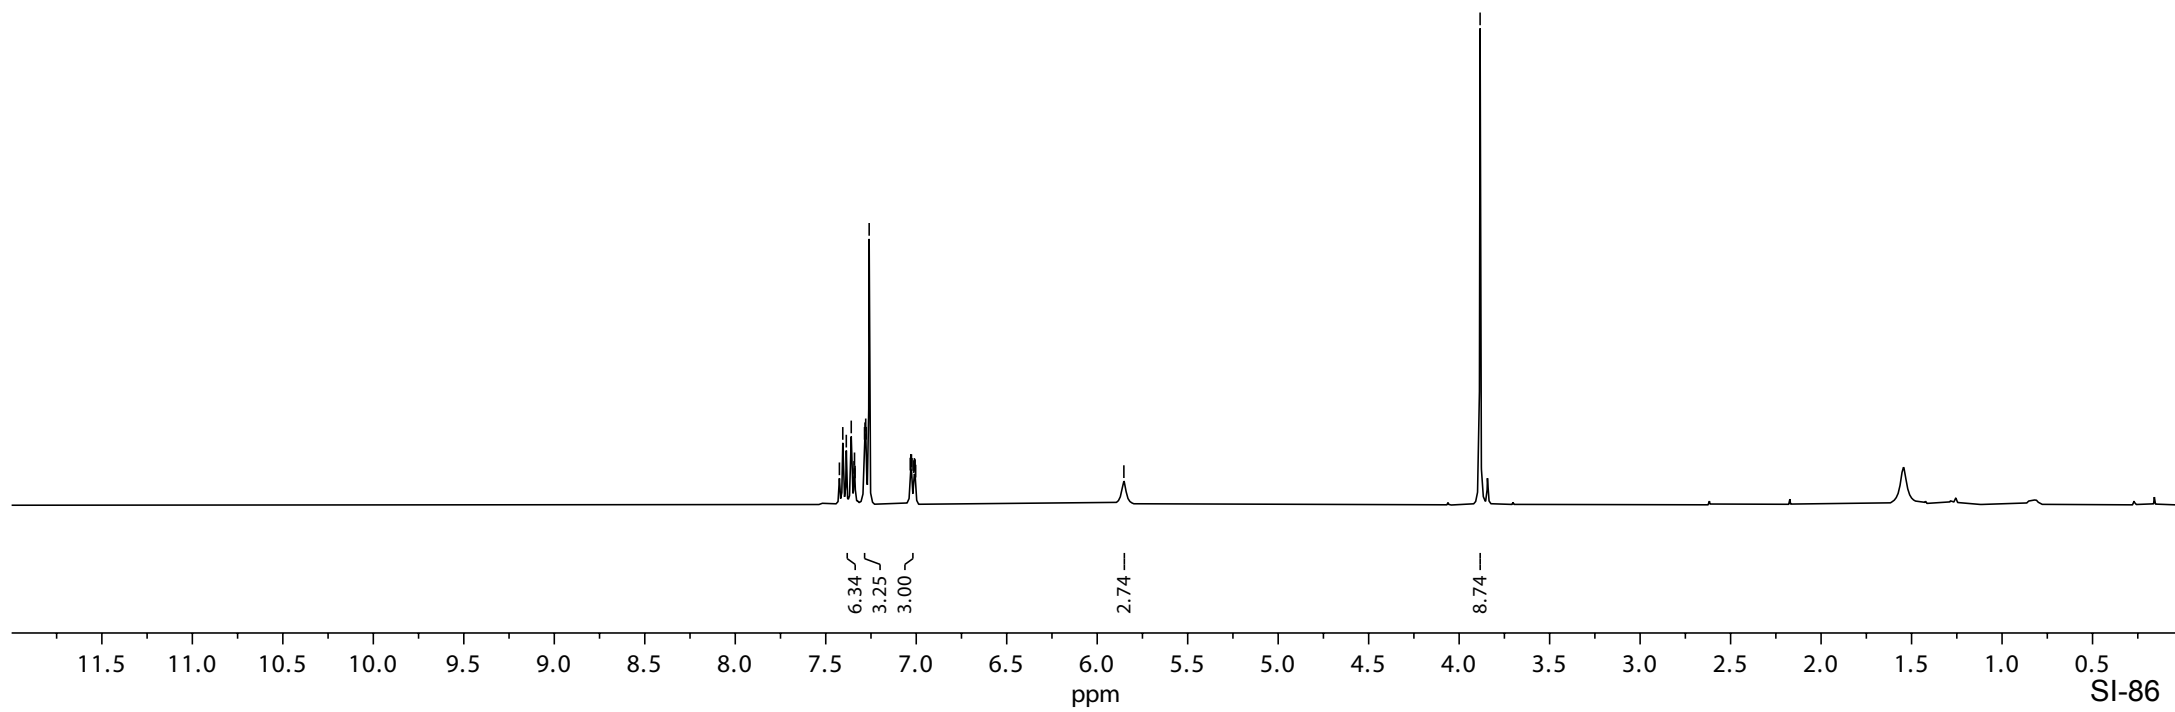

— 33.57

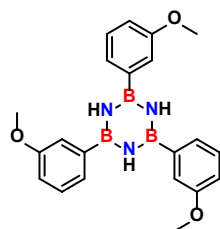

11n, 95%

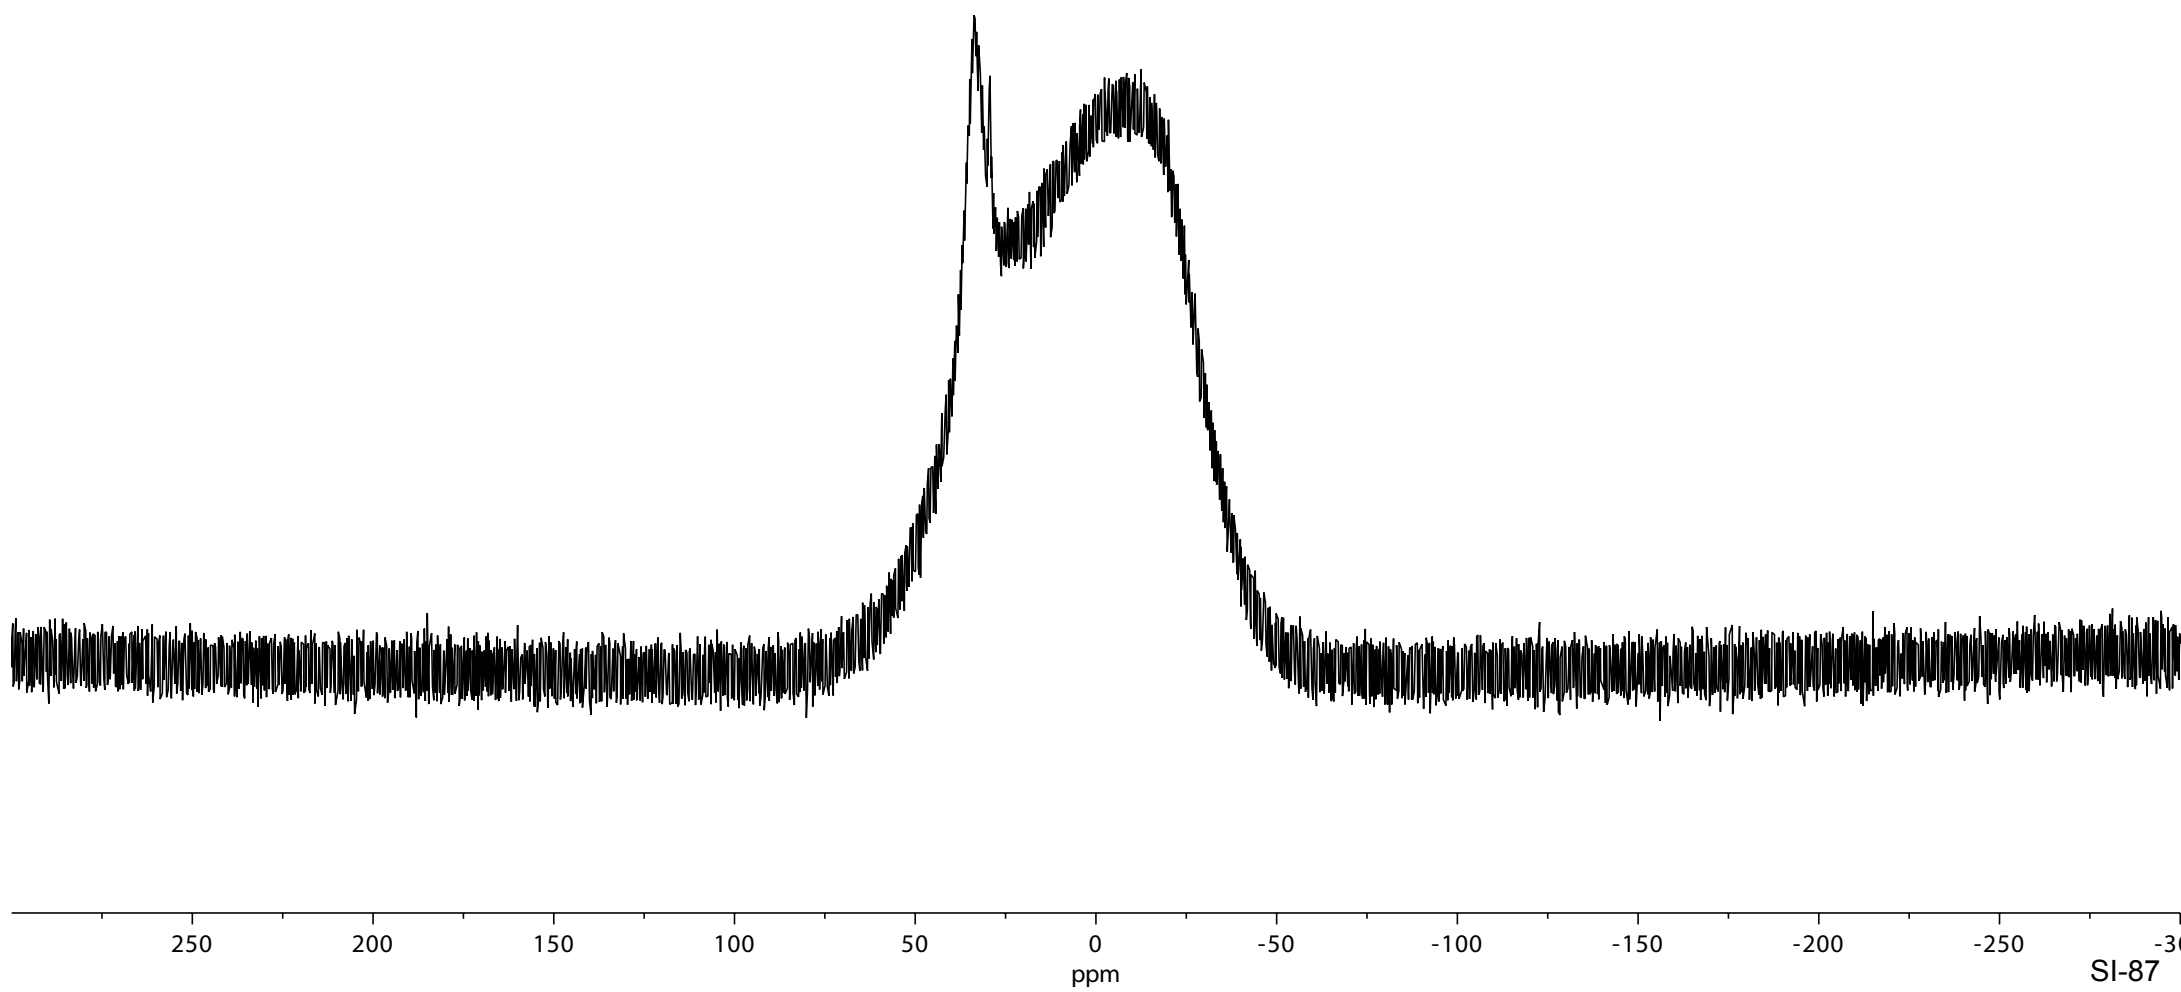

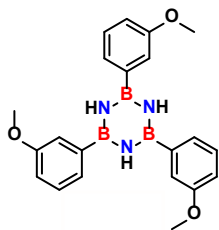

11n, 95%

— 159.46

— 129.46

— 124.26

— 117.52

— 115.15

77.34

77.02

76.70

— 55.29

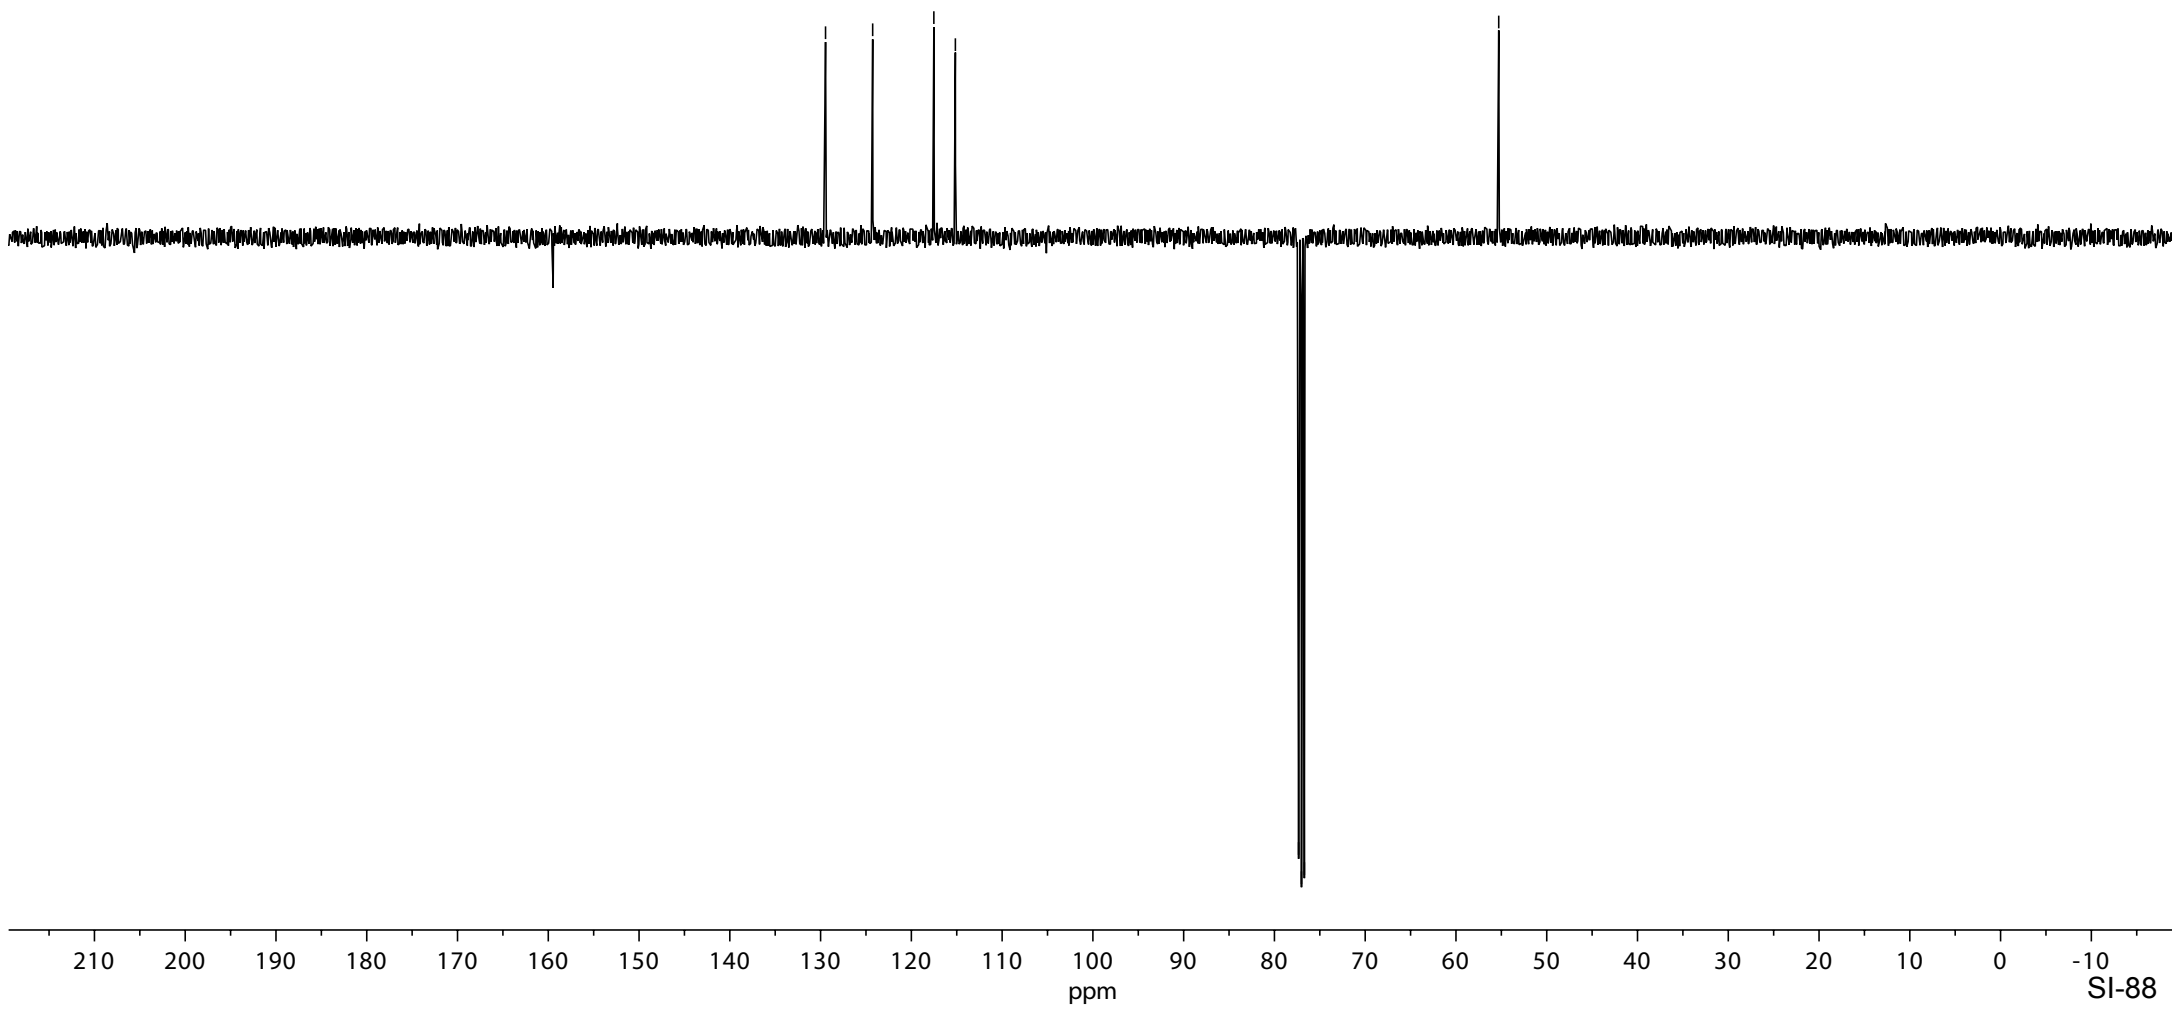

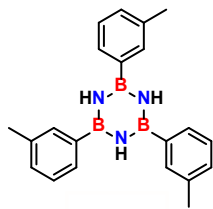

11o, 60%

7.59  
7.39  
7.37  
7.35  
7.31  
7.29  
7.26

5.87

2.45

1.55

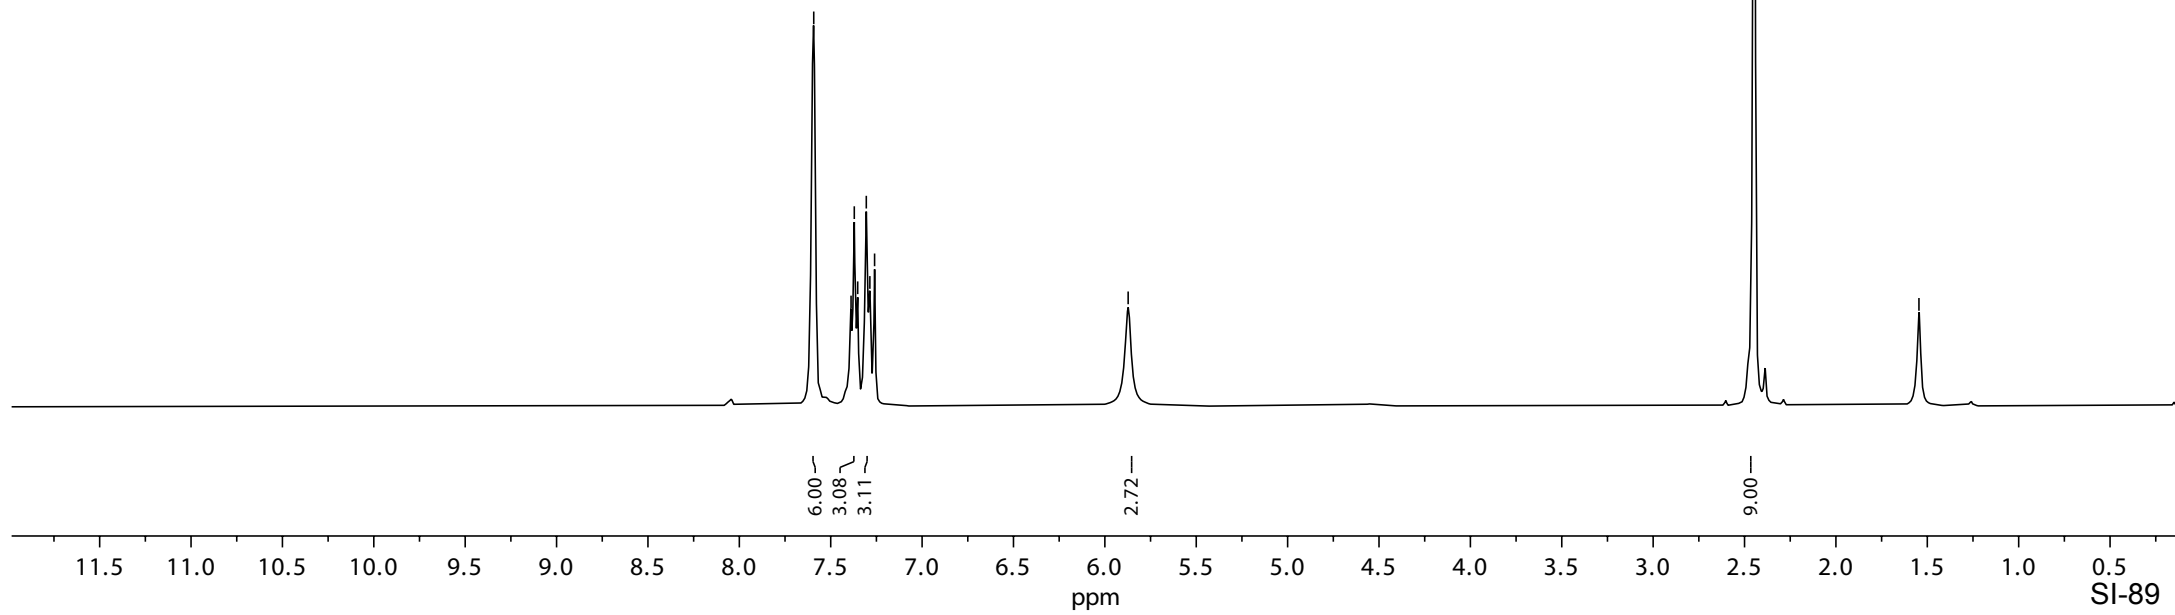

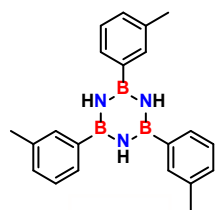

11o, 60%

—33.46

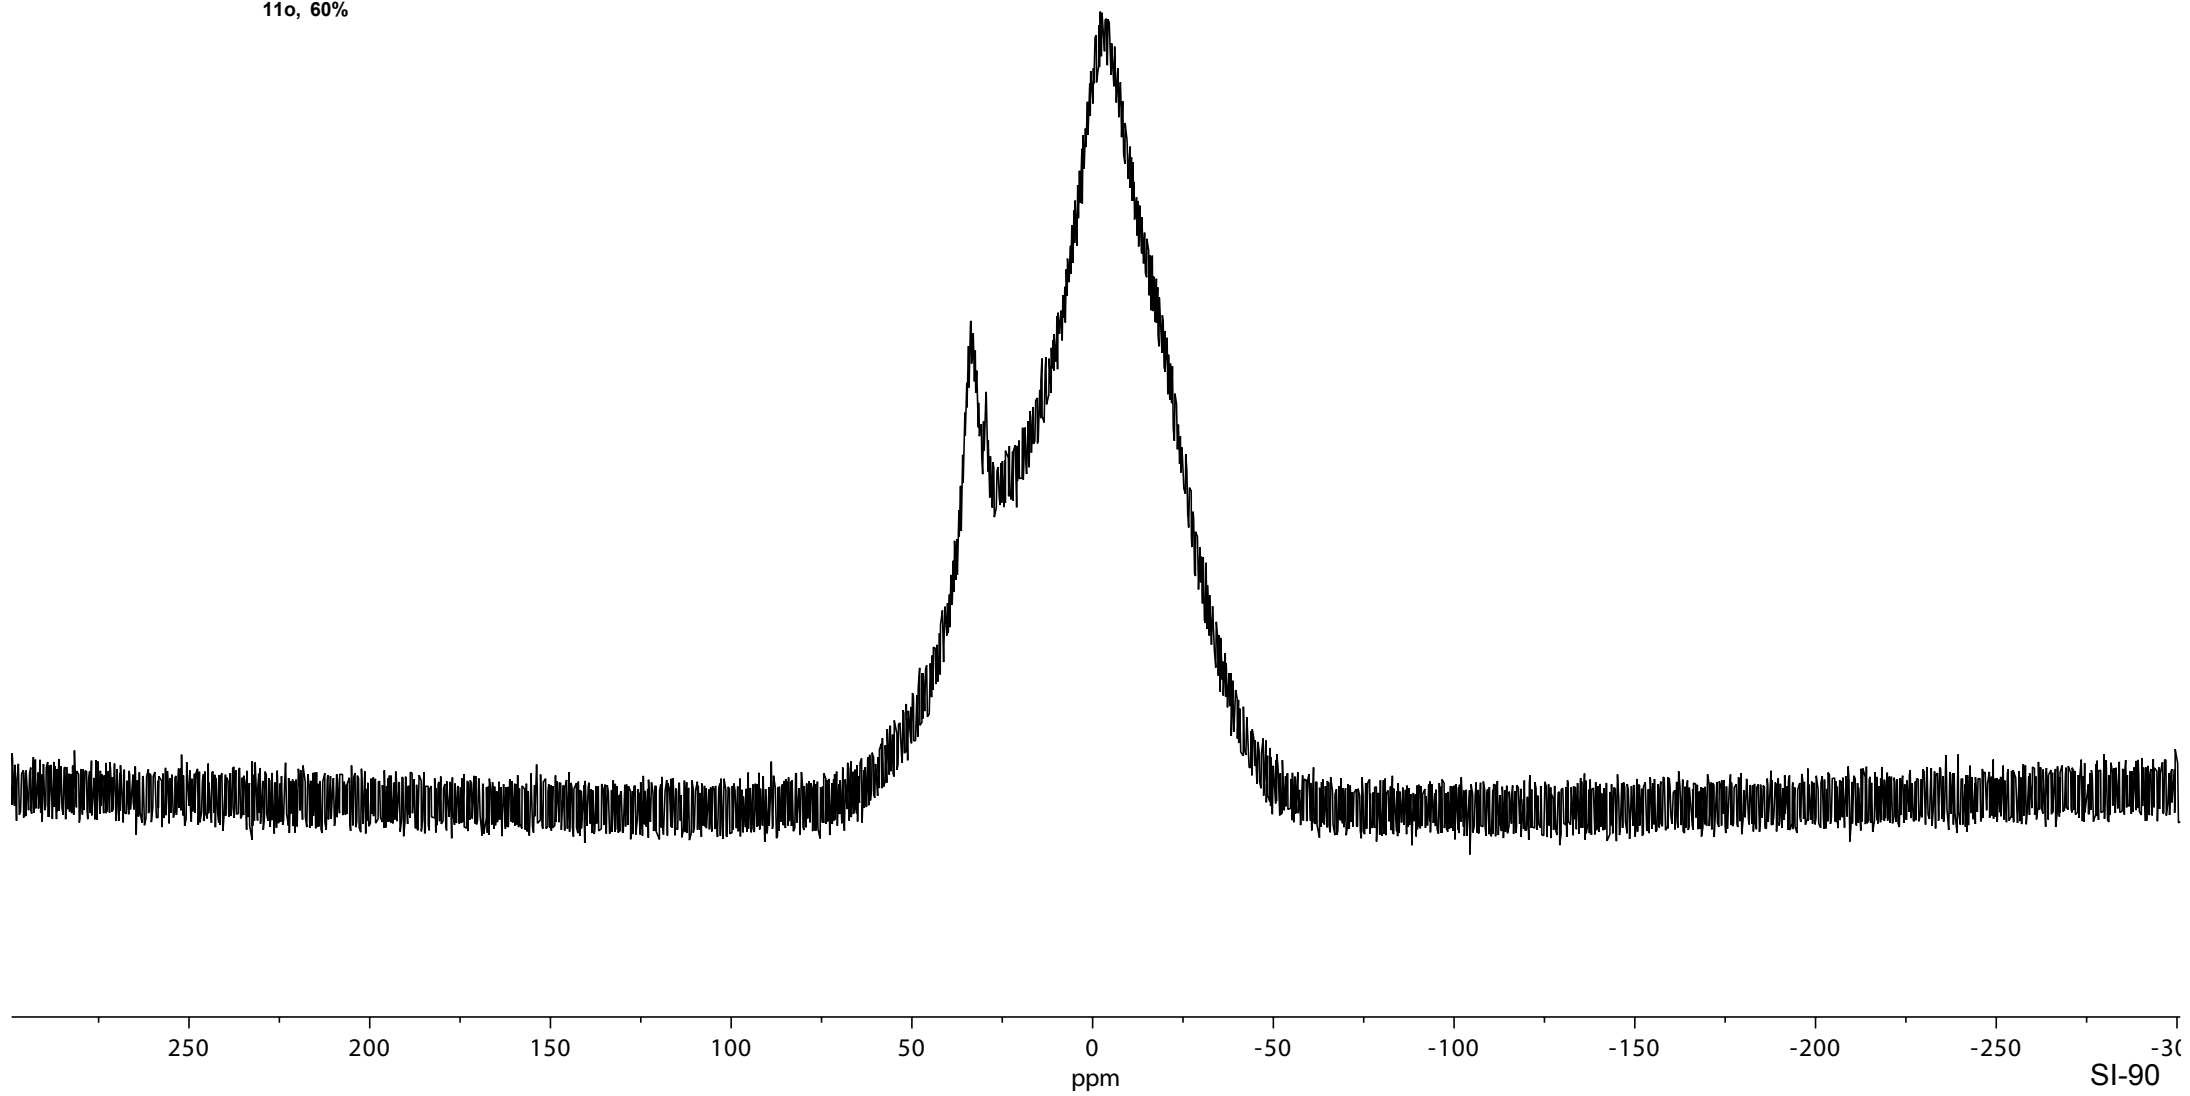

SI-90

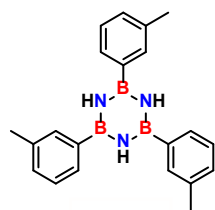

11o, 60%

137.55  
132.70  
130.73  
129.00  
128.14

77.34  
77.02  
76.71

21.59

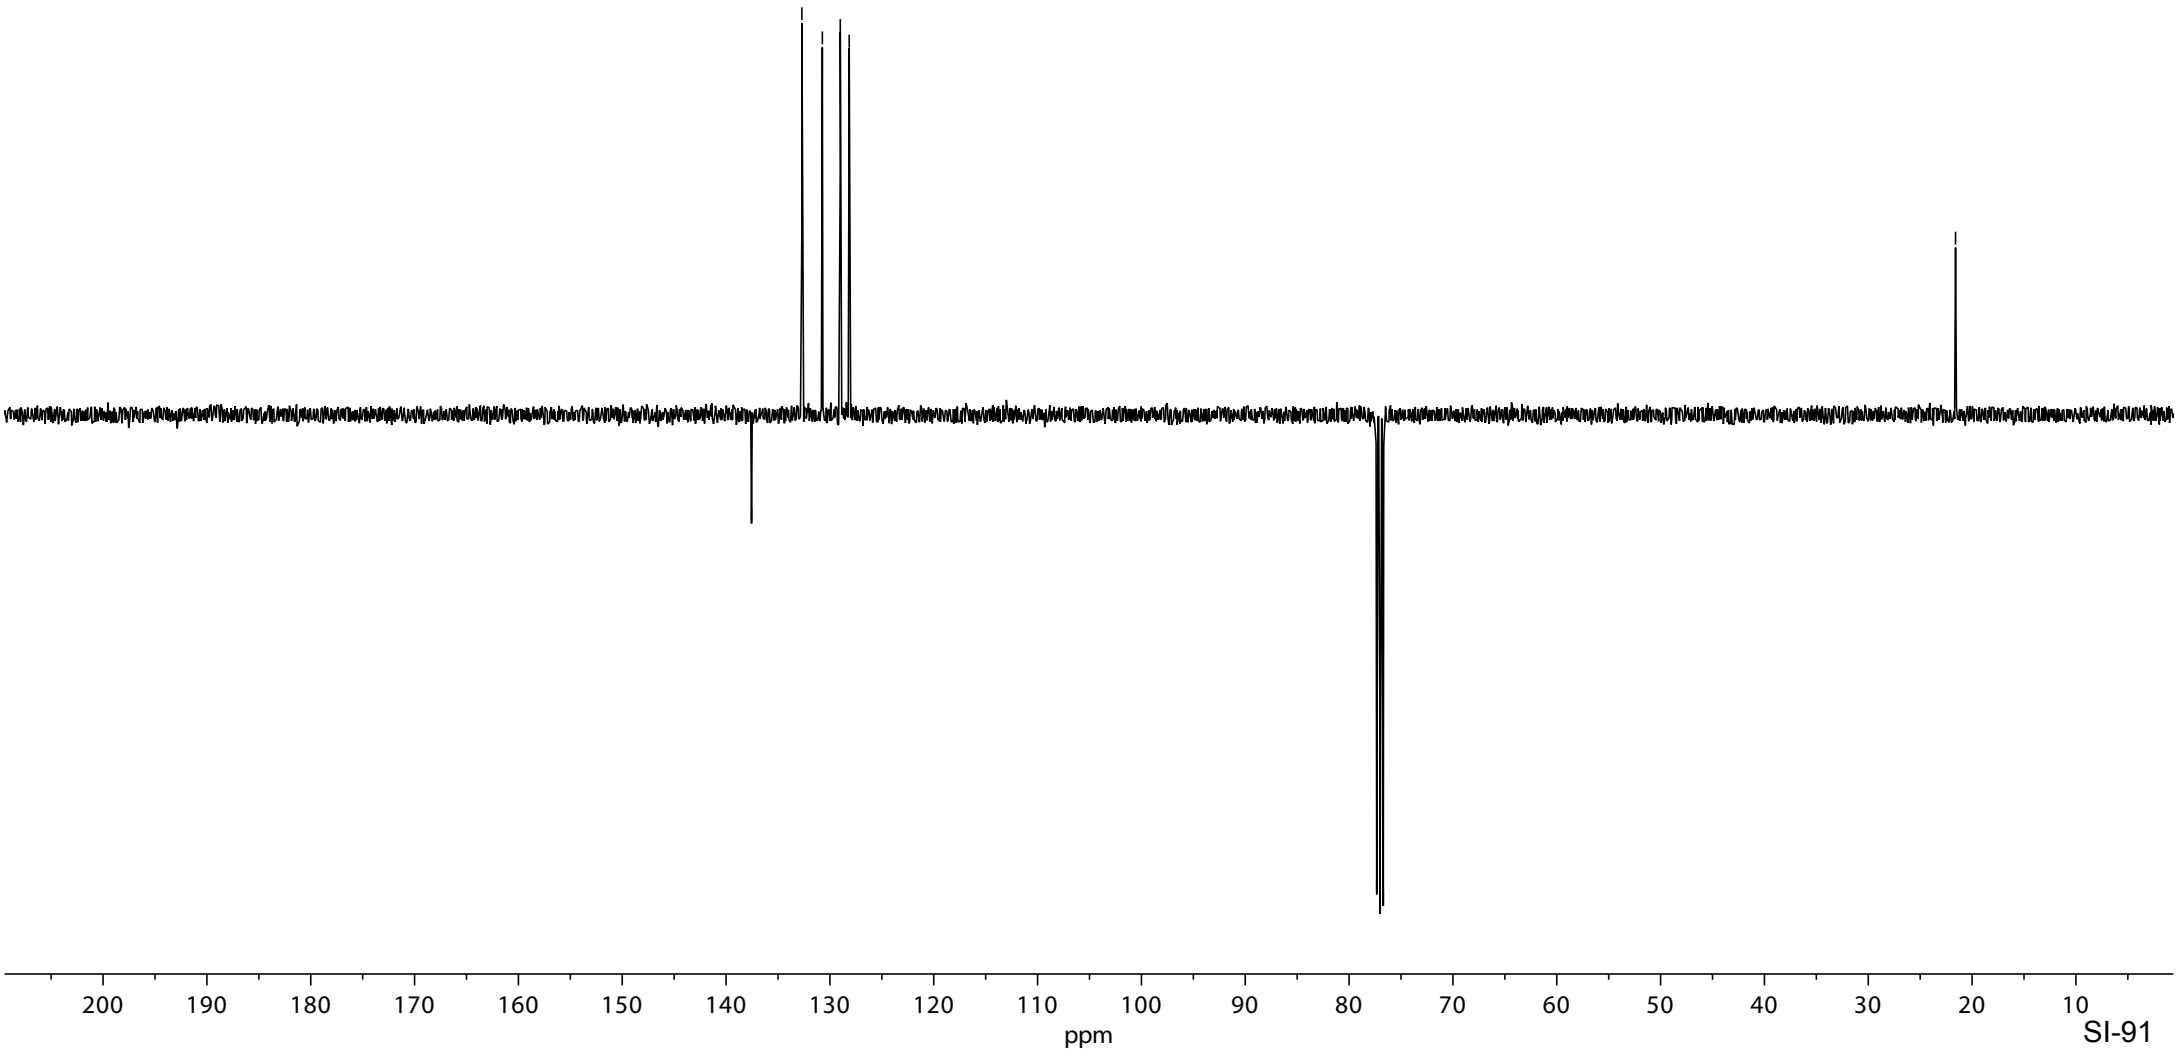



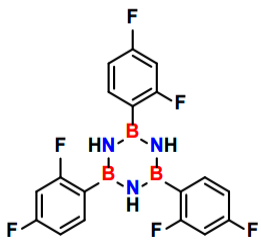

11p, 96%

— 31.69

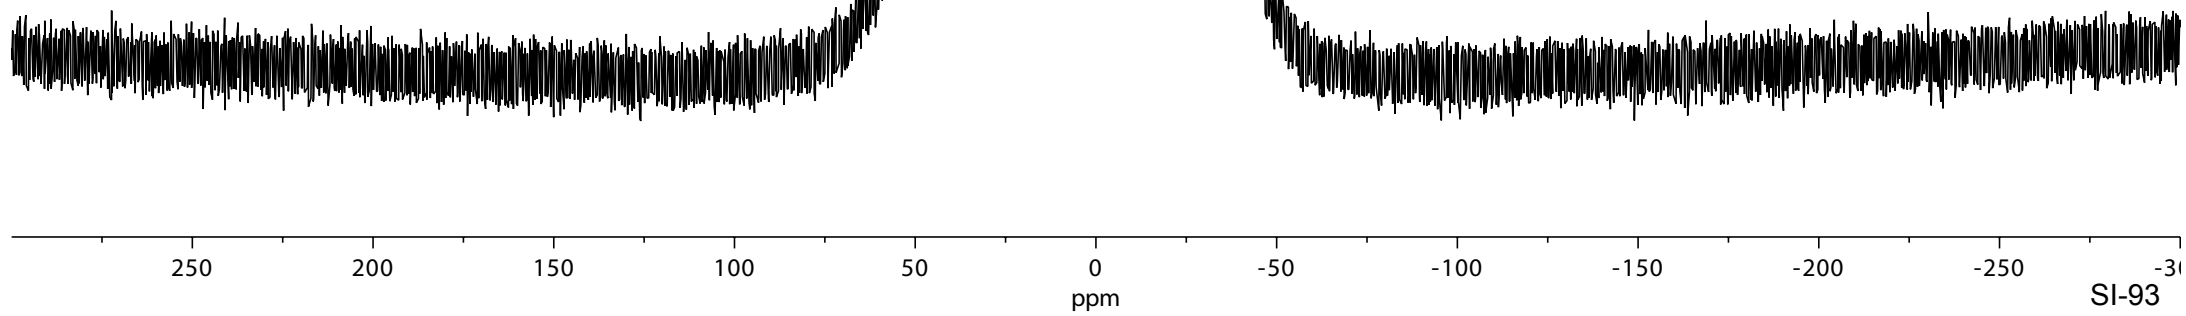

Supplement: d6gc01222a1.pdf [file d6gc01222a1.pdf]
